# Supplementary material for: Stereoselective Synthesis of Tropanes via a 6π‐Electrocyclic Ring‐Opening/ Huisgen [3+2]‐Cycloaddition Cascade of Monocyclopropanated Heterocycles
Source: PubMed Central journal article supplement (PMC7589232; doi:10.1002/anie.202006030), 2020-08-18
Supplement: ANIE-59-18110-s001.pdf [file ANIE-59-18110-s001.pdf]

Supporting Information

**Stereoselective Synthesis of Tropanes via a  $6\pi$ -Electrocyclic Ring-Opening/ Huisgen [3+2]-Cycloaddition Cascade of Monocyclopropanated Heterocycles**

*Carina M. Sonnleitner, Saerom Park, Robert Eckl, Thomas Ertl, and Oliver Reiser\**

anie\_202006030\_sm\_miscellaneous\_information.pdf

## Table of Contents

|                                                      |     |
|------------------------------------------------------|-----|
| 1. General information .....                         | 3   |
| 2. Experimental procedures and analytical data ..... | 4   |
| 2.1. Synthesis of cyclopropanes .....                | 4   |
| 2.2. [3+2]-Cycloaddition reactions .....             | 6   |
| 2.3. Derivatization reactions .....                  | 25  |
| 3. NMR spectra .....                                 | 42  |
| 4. X-Ray structures .....                            | 85  |
| 5. HPLC chromatograms .....                          | 96  |
| 6. References.....                                   | 101 |

## 1. General information

All moisture sensitive reactions were performed in flame-dried glassware under nitrogen atmosphere. Commercially available chemicals were used as purchased. Anhydrous solvents were prepared according to standard procedures. Analytical thin layer chromatography was performed on Silica gel 60 F254 aluminium plates (Merck). Visualization was accomplished using UV-irradiation ( $\lambda = 254$  nm), vanillin/sulfuric acid solution, potassium permanganate solution, bromocresol green or Seebach's stain. Column chromatography was carried out on silica gel Merck Geduran 60 (0.063-0.200 mm) and flash silica gel Merck Geduran Si 60 (0.040-0.063 mm). Furthermore, purification by flash system was performed with silica gel (Merck, 0.040-0.063 mm) on a Reveleris<sup>®</sup> X2 Flash System (Büchi). Melting points were recorded on Stanford Research Systems OptiMelt MPA 100 Automated melting point system. <sup>1</sup>H NMR and <sup>13</sup>C NMR spectra were recorded on Bruker Avance 300 MHz and Bruker Avance 400 MHz spectrometers. Chemical shifts for <sup>1</sup>H NMR were reported as  $\delta$ , parts per million, relative to the signal of CHCl<sub>3</sub> at 7.26 ppm. Chemical shifts for <sup>13</sup>C NMR were reported as  $\delta$ , parts per million, relative to the signal of CHCl<sub>3</sub> at 77.2 ppm and TMS as an internal standard. Coupling constants (*J*) are given in Hertz (Hz). The following notations indicate the multiplicity of the signals: s = singlet, bs = broad singlet, d = doublet, t = triplet, q = quartet, dd = doublet of doublets, dt = doublet of triplets, dq = doublet of quartet, td = triplet of doublets, ddd = doublet of doublet of doublets, ddt = doublet of doublet of triplets, dddd = doublet of doublet of doublet of doublets and m = multiplet. <sup>13</sup>C NMR: (+) = primary/tertiary, (-) = secondary, (q) = quaternary carbon. The assignment resulted from DEPT, COSY, HSQC, HMBC and NOESY experiments. FTIR was carried out on a spectrometer equipped with a Diamon Single Reflection ATR-SYSTEM. The samples were prepared as thin films. Mass spectra were recorded at the Central Analytical Laboratory at the Department of Chemistry of the University of Regensburg on Agilent Technologies 6540 UHD Accurate-Mass Q-TOF LC/MS. Optical rotations [ $\alpha$ ] were determined using Perkin Elmer 241 polarimeter at  $\lambda = 589$  nm (sodium-*d*-line) in a 1.0 dm measuring cell and the specified solvent. X-ray analysis was performed on Agilent Technologies SuperNova and Agilent Technologies GV 1000. Analytical high-performance liquid chromatography (HPLC) was conducted on a Varian 920-LC chromatograph equipped with Diode Array detector. Phenomenex Lux Cellulose-1, Phenomenex Lux Cellulose-2, Chiracel AS-H, Chiracel OJ-H and Chiralpak AS-H served as chiral stationary phase and mixtures of *n*-heptane and *i*-PrOH were used for elution. Microwave irradiation experiments were carried out using an Anton Paar Monowave 300 reactor.

## 2. Experimental procedures and analytical data

Following compounds were synthesized according to literature procedures and spectroscopic data matched well with those reported:

*Tert*-butyl diazoacetate<sup>[1]</sup>, furan-2-carboxylic acid methyl ester<sup>[2]</sup>, 2,2-bis((4*S*)-(-)-4-isopropylloxazoline) propane<sup>[3]</sup>, ethyl 2-diazoacetate<sup>[4]</sup>, 1-tosyl-1*H*-pyrrole<sup>[5]</sup>, *tert*-butyl-1*H*-pyrrole-1-carboxylate<sup>[6]</sup>, ethynyl *p*-tolyl sulfone<sup>[7]</sup>, compounds **4a**<sup>[8]</sup>, (-)-**4a**<sup>[8]</sup>, **4c**<sup>[8]</sup>, (-)-**4c**<sup>[8]</sup>, **4d**<sup>[9]</sup>, **5a**<sup>[10]</sup>, (-)-**5a**<sup>[10]</sup>, **5b**<sup>[10]</sup>.

### 2.1. Synthesis of cyclopropanes

#### 2-(*Tert*-butyl) 6-ethyl (1*S*,5*S*,6*S*)-2-azabicyclo[3.1.0]hex-3-ene-2,6-dicarboxylate (**4b**)

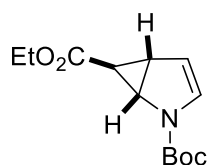

According to literature procedure<sup>[8]</sup>, a flame-dried schlenk flask was charged with Cu(OTf)<sub>2</sub> (482 mg, 1.33 mmol, 0.01 equiv) and dry CH<sub>2</sub>Cl<sub>2</sub> (5 mL) under N<sub>2</sub>-atmosphere. *Tert*-butyl-1*H*-pyrrole-1-carboxylate (22.3 g, 22.3 mL, 133 mmol, 1.0 equiv) was dissolved in dry CH<sub>2</sub>Cl<sub>2</sub> (42 mL) and the Cu(OTf)<sub>2</sub> solution was added at 25 °C. Subsequently, phenylhydrazine (144 mg, 131 μL, 1.33 mmol, 0.01 equiv) was added. Afterwards, ethyl 2-diazoacetate (22.8 g, 9.73 wt%, 200 mmol, 1.5 equiv) in CH<sub>2</sub>Cl<sub>2</sub> was added dropwise to the reaction mixture *via* syringe pump (addition rate: 1 drop/10 s). The reaction mixture was filtered through a plug of basic Al<sub>2</sub>O<sub>3</sub> and washed with CH<sub>2</sub>Cl<sub>2</sub> (800 mL). The solvent was removed under reduced pressure and the crude product was purified by silica gel column chromatography (17% EA:PE) to obtain cyclopropane **4b** (14.0 g, 55.3 mmol, 42%) as a yellow oil. Recrystallization from pentane yielded pure cyclopropane **4b** (10.9 g, 43.1 mmol, 32%) as a colorless solid.

$R_f$  = 0.78 (PE:EA = 2:1; KMnO<sub>4</sub>, vanillin); **m.p.** = 43 °C; <sup>1</sup>H NMR (400 MHz, CDCl<sub>3</sub>): δ = 6.71 – 6.28 (m, 1H), 5.45 – 5.23 (m, 1H), 4.44 – 4.21 (m, 1H), 4.16 – 4.04 (m, 2H), 2.88 – 2.62 (m, 1H), 1.48 (s, 9H), 1.26 – 1.20 (m, 3H), 0.97 – 0.85 (m, 1H) (signal broadening and doubling due to rotamers); <sup>13</sup>C NMR (101 MHz, CDCl<sub>3</sub>): δ = 173.2 (q), 172.9 (q), 151.3 (q), 151.0 (q), 129.8 (+), 129.6 (+), 109.9 (+), 81.7 (q), 60.6 (–), 44.3 (+), 44.1 (+), 32.2 (+), 31.0 (+), 28.3 (+), 23.1 (+), 23.0 (+), 14.3 (+) (signal broadening and doubling due to rotamers); IR  $\tilde{\nu}$  [cm<sup>-1</sup>]: 3097, 3049, 2982, 2940, 2904, 1700, 1588, 1474, 1461, 1398, 1342, 1262, 1249, 1167, 1141, 1044,

1013, 939, 937, 902, 831, 814, 764, 729, 719; **HRMS** (ESI): calcd. for C<sub>13</sub>H<sub>19</sub>NO<sub>4</sub> (M+H)<sup>+</sup>, m/z = 254.1387; found 254.1391.

### Ethyl (1*S*,5*S*,6*S*)-2-tosyl-2-azabicyclo[3.1.0]hex-3-ene-6-carboxylate (**4e**)

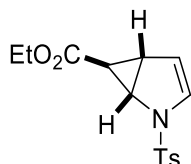

According to literature procedure<sup>[8]</sup>, a flame-dried schlenk flask was charged with Cu(OTf)<sub>2</sub> (361 mg, 998 μmol, 0.01 equiv) and dry CH<sub>2</sub>Cl<sub>2</sub> (10 mL) under N<sub>2</sub>-atmosphere. 1-Tosyl-1*H*-pyrrole (22.1 g, 99.8 mmol, 1.0 equiv) was dissolved in dry CH<sub>2</sub>Cl<sub>2</sub> (60 mL) and the Cu(OTf)<sub>2</sub> solution was added at 25 °C. Subsequently, phenylhydrazine (108 mg, 98 μL, 998 μmol, 0.01 equiv) was added. Afterwards, ethyl 2-diazoacetate (17.1 g, 10.7 wt%, 150 mmol, 1.5 equiv) in CH<sub>2</sub>Cl<sub>2</sub> was added dropwise to the reaction mixture *via* syringe pump (addition rate: 1 drop/10 s). The reaction mixture was filtered through a plug of basic Al<sub>2</sub>O<sub>3</sub> and washed with CH<sub>2</sub>Cl<sub>2</sub> (800 mL). The solvent was removed under reduced pressure and the crude product was purified by silica gel column chromatography (10 → 17% EA:PE) to obtain cyclopropane **4e** (10.5 g, 34.2 mmol, 34%) as a colorless solid.

**R<sub>f</sub>** = 0.36 (PE:EA = 5:1; KMnO<sub>4</sub>, vanillin); **m.p.** = 66 °C; **<sup>1</sup>H NMR** (400 MHz, CDCl<sub>3</sub>): δ = 7.66 (d, *J* = 8.3 Hz, 2H), 7.32 (d, *J* = 8.1 Hz, 2H), 6.33 (d, *J* = 3.9 Hz, 1H), 5.45 (dd, *J* = 3.9, 2.7 Hz, 1H), 4.22 – 3.98 (m, 3H), 2.70 (dt, *J* = 6.1, 2.6 Hz, 1H), 2.44 (s, 3H), 1.24 (t, *J* = 7.1 Hz, 3H), 0.48 – 0.43 (m, 1H); **<sup>13</sup>C NMR** (101 MHz, CDCl<sub>3</sub>): δ = 172.2 (q), 144.5 (q), 133.7 (q), 130.5 (+), 130.1 (+), 127.6 (+), 113.8 (+), 61.0 (-), 45.4 (+), 31.6 (+), 21.8 (+), 21.1 (+), 14.4 (+); **IR**  $\tilde{\nu}$  [cm<sup>-1</sup>]: 3124, 2986, 2907, 1715, 1588, 1495, 1446, 1402, 1379, 1346, 1290, 1163; **HRMS** (ESI): calcd. for C<sub>15</sub>H<sub>17</sub>NO<sub>4</sub>S (M+H)<sup>+</sup>, m/z = 308.0951; found 308.0957.

## 2.2. [3+2]-Cycloaddition reactions

### General procedures for dipolar cycloaddition (GP-1a, GP-1b):

#### General procedure 1a (GP-1a): Conditions I

A microwave vial equipped with a magnetic stirring bar was charged with cyclopropane **4a**, **4b**, **4c**, **4d**, **4e**, **5a**, **5b** (1.0 equiv) and dipolarophile (2.7 equiv). The mixture was stirred for 15-30 min at 150-170 °C under microwave irradiation. The solution was concentrated under reduced pressure and crude product was purified by column chromatography using EA:PE as eluent.

#### General procedure 1b (GP-1b): Conditions II

A microwave vial equipped with a magnetic stirring bar was charged with cyclopropane **4b**, **4c**, **4e**, **5a**, **5b** (1.0 equiv), dipolarophile (1.1-2.7 equiv) and toluene. The mixture was stirred for 0.25-1.5 h at 150-170 °C under microwave irradiation. The solution was concentrated under reduced pressure and crude product was purified by column chromatography using EA:PE as eluent.

### 2,8-Di-*tert*-butyl 6,7-dimethyl (1*S*,2*S*,5*R*)-8-azabicyclo[3.2.1]octa-3,6-diene-2,6,7,8-tetracarboxylate ((+)-**7a**)

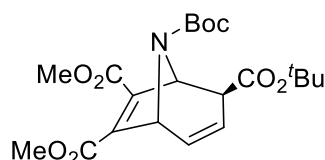

Following GP-1a-Conditions I, (+)-**7a** was prepared from cyclopropane (-)-**4a** (103 mg, 365  $\mu$ mol, 1.0 equiv) and DMAD (140 mg, 120  $\mu$ L, 987  $\mu$ mol, 2.7 equiv). The mixture was heated for 30 min at 150 °C under microwave irradiation. The crude product was purified by flash system (5  $\rightarrow$  13% EA:PE) to afford cycloadduct (+)-**7a** (125 mg, 295  $\mu$ mol, 81%, 99% ee) as a colorless solid.

$R_f$  = 0.58 (PE:EA = 3:1; UV, KMnO<sub>4</sub>); m.p. = 51 °C; HPLC analysis: 99% ee (Phenomenex Lux Cellulose-2, *n*-heptane/*i*-propanol 90:10, 1.0 mL/min, 215 nm):  $t_r$  = 7.82 min;  $[\alpha]_D^{20}$  = +73.2 (c = 1.0 in CHCl<sub>3</sub>); <sup>1</sup>H NMR (300 MHz, CDCl<sub>3</sub>):  $\delta$  = 6.35 (ddd,  $J$  = 9.6, 5.3, 2.1 Hz, 1H), 5.67 (ddd,  $J$  = 9.6, 3.9, 1.8 Hz, 1H), 5.53 (dt,  $J$  = 1.8, 0.9 Hz, 1H), 5.19 – 4.70 (m, 1H), 3.82 (s, 3H), 3.82 (s, 3H), 3.09 (ddd,  $J$  = 3.8, 2.1, 1.0 Hz, 1H), 1.49 (s, 9H), 1.45 (s, 9H) (signal broadening)

due to rotamers);  $^{13}\text{C}$  NMR (101 MHz,  $\text{CDCl}_3$ ):  $\delta$  = 169.0 (q), 163.5 (q), 162.8 (q), 152.6 (q), 148.7 (q), 138.3 (q), 130.6 (+), 124.7 (+), 82.0 (q), 80.9 (q), 62.0 (+), 58.8 (+), 52.57 (+), 52.55 (+), 43.3 (+), 28.3 (+), 28.1 (+) (signal broadening due to rotamers); IR  $\tilde{\nu}$  [ $\text{cm}^{-1}$ ]: 2982, 1707, 1640, 1435, 1312, 1256, 1156, 1081, 1025, 947, 846, 783; HRMS (ESI): calcd. for  $\text{C}_{21}\text{H}_{29}\text{NO}_8$  ( $\text{M}+\text{H}$ ) $^+$ ,  $m/z$  = 424.1966, found 424.1969.

**2,8-Di-*tert*-butyl 6,7-dimethyl (1*S*,2*S*,5*R*)-8-azabicyclo[3.2.1]octa-3,6-diene-2,6,7,8-tetracarboxylate (7a)**

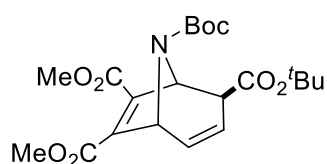

Following GP-1a-Conditions I, **7a** was prepared from cyclopropane **4a** (1.24 g, 4.39 mmol, 1.0 equiv) and DMAD (1.68 g, 1.45 mL, 11.9 mmol, 2.7 equiv). The mixture was heated for 30 min at 150 °C under microwave irradiation. The crude product was purified by flash system (5  $\rightarrow$  13% EA:PE) to afford cycloadduct **7a** (1.54 g, 3.64 mmol, 83%) as a colorless solid.

NMR, m.p. and IR data were identical with those reported for the enantiomer (+)-**7a**.

**2,8-Di-*tert*-butyl 6,7-diethyl (1*S*,2*S*,5*R*)-8-azabicyclo[3.2.1]octa-3,6-diene-2,6,7,8-tetracarboxylate (7b)**

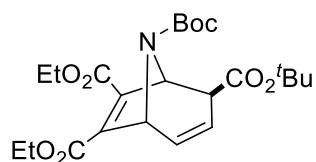

Following GP-1a-Conditions I, **7b** was prepared from cyclopropane **4a** (56.0 mg, 199  $\mu\text{mol}$ , 1.0 equiv) and DEAD (140 mg, 86  $\mu\text{L}$ , 537  $\mu\text{mol}$ , 2.7 equiv). The mixture was heated for 30 min at 150 °C under microwave irradiation. The crude product was purified by flash column chromatography (5  $\rightarrow$  13% EA:PE) to afford cycloadduct **7b** (57.9 mg, 130  $\mu\text{mol}$ , 64%) as a colorless oil.

$R_f$  = 0.30 (PE:EA = 5:1; UV,  $\text{KMnO}_4$ );  $^1\text{H NMR}$  (400 MHz,  $\text{CDCl}_3$ ):  $\delta$  = 6.34 (ddd,  $J$  = 9.6, 5.3, 2.1 Hz, 1H), 5.66 (ddd,  $J$  = 9.6, 3.9, 1.8 Hz, 1H), 5.50 (dt,  $J$  = 1.8, 0.9 Hz, 1H), 5.17 – 4.70 (m, 1H), 4.40 – 4.16 (m, 4H), 3.09 (ddd,  $J$  = 3.4, 2.2, 0.9 Hz, 1H), 1.48 (s, 9H), 1.44 (s, 9H), 1.35 – 1.27 (m, 6H) (signal broadening due to rotamers);  $^{13}\text{C NMR}$  (75 MHz,  $\text{CDCl}_3$ )  $\delta$  = 169.0 (q), 163.1 (q), 162.5 (q), 152.4 (q), 138.1 (q), 135.0 (q), 130.7 (+), 124.6 (+), 81.8 (q), 80.8 (q), 62.0 (+), 61.6 (–), 61.5 (–), 58.6 (+), 43.2 (+), 28.2 (+), 28.0 (+), 14.0 (+) (signal broadening due to rotamers);  $\text{IR } \tilde{\nu}$  [ $\text{cm}^{-1}$ ]: 2982, 2937, 1707, 1640, 1476, 1457, 1392, 1368, 1305, 1252, 1159, 1115, 1077, 1033, 869, 844, 775;  $\text{HRMS}$  (ESI): calcd. for  $\text{C}_{23}\text{H}_{33}\text{NO}_8$  ( $\text{M}+\text{H}$ ) $^+$ ,  $m/z$  = 452.2279, found 452.2281.

**8-(*Tert*-butyl) 2-ethyl 6,7-dimethyl (1*S*,2*S*,5*R*)-8-azabicyclo[3.2.1]octa-3,6-diene-2,6,7,8-tetracarboxylate (7c)**

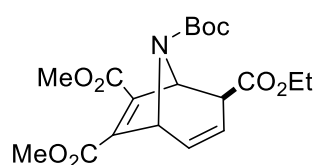

Following GP-1a-Conditions I, **7c** was prepared from cyclopropane **4b** (1.02 g, 4.03 mmol, 1.0 equiv) and DMAD (1.55 g, 1.33 mL, 10.9 mmol, 2.7 equiv). The mixture was heated for 30 min at 150 °C under microwave irradiation. The crude product was purified by flash system (6 → 15% EA:PE) to afford cycloadduct **7c** (1.15 g, 2.91 mmol, 72%) as a yellowish oil.

$R_f$  = 0.62 (PE:EA = 2:1;  $\text{KMnO}_4$ );  $^1\text{H NMR}$  (300 MHz,  $\text{CDCl}_3$ ):  $\delta$  = 6.38 (ddd,  $J$  = 9.7, 5.2, 2.1 Hz, 1H), 5.69 (ddd,  $J$  = 9.6, 3.7, 1.8 Hz, 1H), 5.55 – 5.42 (m, 1H), 5.13 – 4.72 (m, 1H), 4.26 – 4.15 (m, 2H), 3.81 (s, 3H), 3.80 (s, 3H), 3.14 (ddd,  $J$  = 3.5, 2.2, 0.9 Hz, 1H), 1.42 (s, 9H), 1.28 (t,  $J$  = 7.1 Hz, 3H) (signal broadening due to rotamers);  $^{13}\text{C NMR}$  (101 MHz,  $\text{CDCl}_3$ ):  $\delta$  = 169.9 (q), 163.2 (q), 162.6 (q), 152.3 (q), 149.0 (q), 137.8 (q), 131.1 (+), 124.1 (+), 80.9 (q), 61.7 (+), 61.5 (–), 58.4 (+), 52.5 (+), 42.2 (+), 28.1 (+), 14.1 (+) (signal broadening due to rotamers);  $\text{IR } \tilde{\nu}$  [ $\text{cm}^{-1}$ ]: 2982, 1703, 1640, 1435, 1390, 1249, 1163, 1118, 1077, 1028, 947, 887, 857, 760;  $\text{HRMS}$  (ESI): calcd. for  $\text{C}_{19}\text{H}_{25}\text{NO}_8$  ( $\text{M}+\text{H}$ ) $^+$ ,  $m/z$  = 418.1472; found 418.1474.



**8-(*Tert*-butyl) 2,6,7-trimethyl (1*S*,2*S*,5*R*)-8-azabicyclo[3.2.1]octa-3,6-diene-2,6,7,8-tetracarboxylate (7d)**

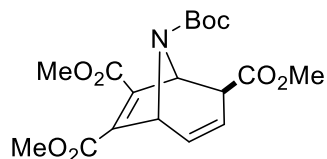

Following GP-1a-Conditions I, **7d** was prepared from cyclopropane **4c** (1.00 g, 4.18 mmol, 1.0 equiv) and DMAD (1.60 g, 1.38 mL, 11.3 mmol, 2.7 equiv). The mixture was heated for 30 min at 150 °C under microwave irradiation. The crude product was purified by flash system (6 → 20% EA:PE) to afford cycloadduct **7d** (1.18 g, 3.09 mmol, 74%) as a yellowish oil.

$R_f$  = 0.56 (PE:EA = 2:1; UV,  $\text{KMnO}_4$ );  $^1\text{H NMR}$  (400 MHz,  $\text{CDCl}_3$ ):  $\delta$  = 6.37 (ddd,  $J$  = 10.1, 5.3, 2.0 Hz, 1H), 5.66 (ddd,  $J$  = 9.7, 3.8, 1.8 Hz, 1H), 5.47 – 5.41 (m, 1H), 5.11 – 4.71 (m, 1H), 3.79 (s, 3H), 3.78 (s, 3H), 3.73 (s, 3H), 3.22 – 3.05 (m, 1H), 1.40 (s, 9H) (signal broadening due to rotamers);  $^{13}\text{C NMR}$  (101 MHz,  $\text{CDCl}_3$ ):  $\delta$  = 170.5 (q), 163.1 (q), 162.6 (q), 152.2 (q), 148.6 (q), 137.6 (q), 131.3 (+), 124.0 (+), 81.0 (q), 61.8 (+), 58.3 (+), 52.5 (+), 42.0 (+), 28.2 (+) (signal broadening due to rotamers);  $\text{IR } \tilde{\nu}$  [ $\text{cm}^{-1}$ ]: 2956, 1700, 1640, 2435, 1435, 1394, 1312, 1249, 1163, 1118, 1077, 1025, 947, 857, 760;  $\text{HRMS}$  (ESI): calcd. for  $\text{C}_{18}\text{H}_{23}\text{NO}_8$  ( $\text{M}+\text{NH}_4$ ) $^+$ ,  $m/z$  = 399.1762, found 399.1762.

**2-Ethyl 6,7-dimethyl (1*S*,2*S*,5*R*)-8-tosyl-8-azabicyclo[3.2.1]octa-3,6-diene-2,6,7-tricarboxylate (7e)**

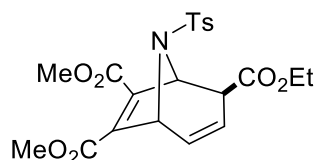

Following GP-1a-Conditions I, **7e** was prepared from cyclopropane **4e** (102 mg, 332  $\mu\text{mol}$ , 1.0 equiv) and DMAD (127 mg, 110  $\mu\text{L}$ , 896  $\mu\text{mol}$ , 2.7 equiv). The mixture was heated for 15 min at 170 °C under microwave irradiation. The crude product was purified by flash system (16 → 41% EA:PE) to afford cycloadduct **7e** (105 mg, 234  $\mu\text{mol}$ , 70%) as a colorless oil.

$R_f$  = 0.43 (PE:EA = 2:1; UV,  $\text{KMnO}_4$ );  $^1\text{H NMR}$  (400 MHz,  $\text{CDCl}_3$ ):  $\delta$  = 7.64 – 7.60 (m, 2H), 7.24 (d,  $J$  = 8.0 Hz, 2H), 6.35 (ddd,  $J$  = 9.5, 5.8, 2.1 Hz, 1H), 5.71 (ddd,  $J$  = 9.5, 4.0, 1.6 Hz, 1H), 5.44 – 5.40 (m, 1H), 4.85 (dd,  $J$  = 5.8, 1.1 Hz, 1H), 4.26 – 4.14 (m, 2H), 3.69 (s, 3H), 3.68 (s,

3H), 3.16 (ddd,  $J = 3.7, 2.1, 1.0$  Hz, 1H), 2.38 (s, 3H), 1.29 (t,  $J = 7.1$  Hz, 3H);  $^{13}\text{C NMR}$  (101 MHz,  $\text{CDCl}_3$ ):  $\delta = 169.0$  (q), 162.6 (q), 161.8 (q), 147.8 (q), 144.2 (q), 135.4 (q), 134.3 (q), 130.2 (+), 129.9 (+), 128.0 (+), 124.4 (+), 64.5 (+), 61.9 (–), 61.5 (+), 52.41 (+), 52.36 (+), 43.5 (+), 21.6 (+), 14.1 (+);  $\text{IR } \tilde{\nu}$  [ $\text{cm}^{-1}$ ]: 2982, 2956, 2931, 2856, 1711, 1644, 1599, 1439, 1349, 1287, 1245, 1163, 1126, 1088, 1022, 1021, 965, 936, 857, 816, 782, 753, 706, 690; **HRMS** (ESI): calcd. for  $\text{C}_{21}\text{H}_{23}\text{NO}_8\text{S}$  ( $\text{M}+\text{H}$ ) $^+$ ,  $m/z = 450.1217$ , found 450.1211.

### Triethyl (1*S*,2*S*,5*R*)-8-tosyl-8-azabicyclo[3.2.1]octa-3,6-diene-2,6,7-tricarboxylate (**7f**)

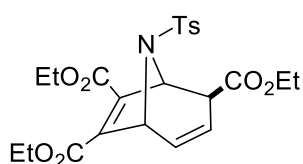

Following GP-1b-Conditions II, **7f** was prepared from cyclopropane **4e** (123 mg, 400  $\mu\text{mol}$ , 1.0 equiv) and diethyl acetylenedicarboxylate (200  $\mu\text{L}$ , 212 mg, 1.25 mmol, 3.0 equiv) in toluene (0.4 mL). The mixture was heated for 30 min at 150  $^\circ\text{C}$  under microwave irradiation. The crude product was purified by flash system (5  $\rightarrow$  13% EA:PE) to afford cycloadduct **7f** (115 mg, 240  $\mu\text{mol}$ , 61%) as a colorless oil.

$R_f = 0.38$  (PE:EA = 2:1; UV;  $\text{KMnO}_4$ );  $^1\text{H NMR}$  (300 MHz,  $\text{CDCl}_3$ ):  $\delta = 7.66 - 7.57$  (m, 2H), 7.22 (d,  $J = 8.0$  Hz, 2H), 6.35 (ddd,  $J = 9.5, 5.8, 2.1$  Hz, 1H), 5.71 (ddd,  $J = 9.5, 3.9, 1.6$  Hz, 1H), 5.41 (q,  $J = 1.3$  Hz, 1H), 4.83 (dd,  $J = 5.8, 1.1$  Hz, 1H), 4.27 – 4.06 (m, 6H), 3.16 (ddd,  $J = 3.5, 2.2, 1.1$  Hz, 1H), 2.36 (s, 3H), 1.29 (t,  $J = 7.1$  Hz, 3H), 1.24 – 1.18 (m, 6H);  $^{13}\text{C NMR}$  (75 MHz,  $\text{CDCl}_3$ ):  $\delta = 170.0$  (q), 162.3 (q), 161.4 (q), 147.4 (q), 143.9 (q), 135.2 (q), 134.3 (q), 130.2 (+), 129.9 (+), 127.9 (+), 124.3 (+), 64.6 (+), 61.9 (–), 61.54 (+), 61.47 (–), 61.4 (–), 43.5 (+), 21.6 (+), 14.1 (+), 14.0 (+);  $\text{IR } \tilde{\nu}$  [ $\text{cm}^{-1}$ ]: 2982, 2933, 2908, 1711, 1640, 1599, 1447, 1446, 1394, 1370, 1353, 1286, 1241, 1163, 1091, 1081, 1036, 965, 938, 910, 855, 816, 735, 705, 687; **HRMS** (ESI): calcd. for  $\text{C}_{23}\text{H}_{27}\text{NO}_8\text{S}$  ( $\text{M}+\text{Na}$ ) $^+$ ,  $m/z = 500.1349$ ; found 500.1350.

**8-(*Tert*-butyl) 6,7-dimethyl (1*R*,4*S*,5*S*)-4-(hydroxymethyl)-8-azabicyclo[3.2.1]octa-2,6-diene-6,7,8-tricarboxylate (7g)**

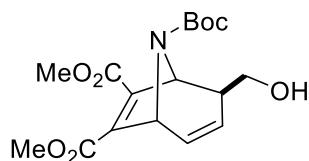

Following GP-1a-Conditions I, **7g** was prepared from cyclopropane **4d** (96.0 mg, 454  $\mu\text{mol}$ , 1.0 equiv) and DMAD (174 mg, 150  $\mu\text{L}$ , 1.23 mmol, 2.7 equiv). The mixture was heated for 30 min at 100  $^{\circ}\text{C}$  under microwave irradiation. The crude product was purified by flash system (3  $\rightarrow$  40% EA:PE) to afford cycloadduct **7g** (120 mg, 340  $\mu\text{mol}$ , 75%) as a colorless oil.

$R_f$  = 0.31 (PE:EA = 1:1;  $\text{KMnO}_4$ );  $^1\text{H NMR}$  (300 MHz,  $\text{CDCl}_3$ ):  $\delta$  = 6.33 (ddd,  $J$  = 9.7, 5.1, 1.9 Hz, 1H), 5.46 (ddd,  $J$  = 9.6, 3.6, 1.8 Hz, 1H), 5.18 – 5.07 (m, 1H), 4.97 – 4.74 (m, 1H), 3.82 (s, 3H), 3.81 (s, 3H), 3.71 – 3.58 (m, 1H), 2.53 – 2.33 (m, 2H), 1.46 (s, 9H) (signal broadening due to rotamers);  $^{13}\text{C NMR}$  (101 MHz,  $\text{CDCl}_3$ ):  $\delta$  = 163.3 (q), 162.7 (q), 152.3 (q), 147.3 (q), 138.1 (q), 131.0 (+), 127.5 (+), 81.1 (q), 63.6 (–), 60.4 (+), 58.4 (+), 52.5 (+), 52.4 (+), 40.4 (+), 28.3 (+) (signal broadening due to rotamers); IR  $\tilde{\nu}$  [ $\text{cm}^{-1}$ ]: 3437, 2978, 1700, 1640, 1431, 1367, 1327, 1260, 1163, 1118, 1077, 1033, 943, 861, 757, 731; HRMS (ESI): calcd. for  $\text{C}_{17}\text{H}_{23}\text{NO}_7$  ( $\text{M}+\text{H}$ ) $^+$ ,  $m/z$  = 354.1547; found 354.1547.

**Ethyl (3*aS*,4*S*,5*S*,8*R*,8*aR*)-1,3-dioxo-9-tosyl-3,3*a*,4,5,8,8*a*-hexahydro-1*H*-4,8-epiminocyclohepta[*c*]furan-5-carboxylate (7h)**

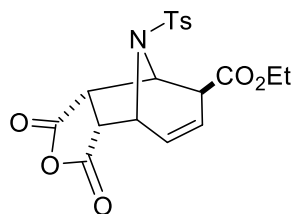

Following GP-1b-Conditions II, **7h** was prepared from cyclopropane **4e** (307 mg, 1.00 mmol, 1.0 equiv) and maleic anhydride (108 mg, 1.10 mmol, 1.1 equiv) in toluene (2 mL). The mixture was heated for 1 h at 150  $^{\circ}\text{C}$  under microwave irradiation. The crude mixture was filtered through a short plug of silica gel and the solvent was removed under reduced pressure to afford the desired cycloaddition product **7h** (320 mg, 789  $\mu\text{mol}$ , 79%) as a colorless solid.

$R_f$  = 0.10 (PE:EA = 3:1, UV); **m.p.** = 155  $^{\circ}\text{C}$ ;  $^1\text{H NMR}$  (300 MHz,  $\text{CDCl}_3$ ):  $\delta$  = 7.77 – 7.70 (m,

2H), 7.36 – 7.28 (m, 2H), 6.13 (ddd,  $J = 9.6, 5.8, 1.8$  Hz, 1H), 5.94 (ddd,  $J = 9.6, 4.5, 1.4$  Hz, 1H), 5.14 (dq,  $J = 8.4, 1.6$  Hz, 1H), 4.82 (ddd,  $J = 7.2, 5.9, 1.6$  Hz, 1H), 4.18 (dd,  $J = 10.0, 8.4$  Hz, 1H), 4.10 – 3.90 (m, 2H), 3.83 (dq,  $J = 10.8, 7.1$  Hz, 1H), 3.49 (dt,  $J = 4.5, 1.8$  Hz, 1H), 2.44 (s, 3H), 1.13 (t,  $J = 7.1$  Hz, 3H);  $^{13}\text{C NMR}$  (75 MHz,  $\text{CDCl}_3$ ):  $\delta = 169.6$  (q), 168.8 (q), 167.5 (q), 145.0 (q), 134.9 (q), 129.9 (+), 128.5 (+), 128.1 (+), 126.3 (+), 61.7 (–), 58.7 (+), 56.02 (+), 55.99 (+), 50.4 (+), 45.1 (+), 21.7 (+), 13.9 (+); **IR**  $\tilde{\nu}$  [ $\text{cm}^{-1}$ ]: 2989, 1864, 1774, 1722, 1595, 1446, 1368, 1325, 1308, 1259, 1242, 1221, 1208, 1185, 1156, 1088, 1021, 1006, 987, 917, 902, 857, 813, 763, 719, 667; **HRMS** (ESI): calcd. for  $\text{C}_{19}\text{H}_{19}\text{NO}_7\text{S}$  ( $\text{M}+\text{H}$ ) $^+$ ,  $m/z = 406.0955$ ; found 406.0955.

**Ethyl (3a*S*,4*R*,5*S*,8*R*,8a*R*)-1,3-dioxo-2-phenyl-9-tosyl-1,2,3,3a,4,5,8,8a-octahydro-4,8-epiminocyclohepta[*c*]pyrrole-5-carboxylate (7i)**

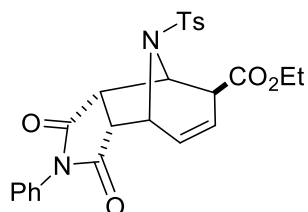

Following GP-1b-Conditions II, **7i** was prepared from cyclopropane **4e** (154 mg, 501  $\mu\text{mol}$ , 1.0 equiv) and *N*-phenylmaleimide (95.4 mg, 551  $\mu\text{mol}$ , 1.1 equiv) in toluene (0.5 mL). The mixture was heated for 30 min at 150  $^\circ\text{C}$  under microwave irradiation. The crude product was purified by flash column chromatography (33% EA:PE) to afford cycloadduct **7i** (154 mg, 320  $\mu\text{mol}$ , 64%) as a colorless solid.

$R_f = 0.29$  (PE:EA = 2:1; UV); **m.p.** = 71  $^\circ\text{C}$ ;  $^1\text{H NMR}$  (300 MHz,  $\text{CDCl}_3$ ):  $\delta = 7.83 - 7.74$  (m, 2H), 7.52 – 7.36 (m, 3H), 7.36 – 7.29 (m, 2H), 7.19 – 7.09 (m, 2H), 6.13 (ddd,  $J = 9.7, 5.8, 1.8$  Hz, 1H), 5.95 (ddd,  $J = 9.6, 4.4, 1.4$  Hz, 1H), 5.19 (dq,  $J = 8.3, 1.5$  Hz, 1H), 4.97 – 4.79 (m, 1H), 4.11 – 3.78 (m, 4H), 3.53 (dt,  $J = 4.3, 1.7$  Hz, 1H), 2.44 (s, 3H), 1.15 (t,  $J = 7.1$  Hz, 3H);  $^{13}\text{C NMR}$  (75 MHz,  $\text{CDCl}_3$ ):  $\delta = 174.7$  (q), 173.2 (q), 169.3 (q), 144.6 (q), 135.6 (q), 131.3 (q), 129.8 (+), 129.3 (+), 129.1 (+), 128.6 (+), 128.0 (+), 126.3 (+), 125.7 (+), 61.6 (–), 58.3 (+), 56.0 (+), 54.4 (+), 49.5 (+), 45.1 (+), 21.7 (+), 14.0 (+); **IR**  $\tilde{\nu}$  [ $\text{cm}^{-1}$ ]: 2982, 1707, 1595, 1498, 1457, 1579, 1353, 1327, 1304, 1185, 1156, 1088, 1049, 1029, 932, 906, 862, 817, 735, 717, 691, 664; **HRMS** (ESI): calcd. for  $\text{C}_{25}\text{H}_{24}\text{N}_2\text{O}_6\text{S}$  ( $\text{M}+\text{H}$ ) $^+$ ,  $m/z = 481.1428$ ; found 481.1432.

**8-(*Tert*-butyl) 2-ethyl (1*R*,2*S*,5*R*,6*S*,7*S*)-6,7-dicyano-8-azabicyclo[3.2.1]oct-3-ene-2,8-dicarboxylate (*major 7j*)**

**8-(*Tert*-butyl) 2-ethyl (1*R*,2*S*,5*R*,6*R*,7*R*)-6,7-dicyano-8-azabicyclo[3.2.1]oct-3-ene-2,8-dicarboxylate (*minor 7j*)**

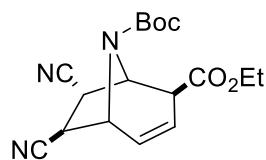

*major 7j*

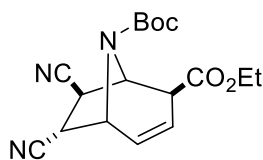

*minor 7j*

Following GP-1b-Conditions II, **7j** was prepared from cyclopropane **4b** (102 mg, 403  $\mu$ mol, 1.0 equiv) and fumaronitrile (85.0 mg, 1.09 mmol, 2.7 equiv) in toluene (0.3 mL). The mixture was heated for 1 h at 150  $^{\circ}$ C under microwave irradiation. The crude product (diastereomeric ratio of *dr* 4.5:1) was purified by flash system (12  $\rightarrow$  19% EA:PE) to afford *major 7j* (25.4 mg, 76.7  $\mu$ mol, 19%) and inseparable mixture of *major* and *minor 7j* (81.2 mg, 245  $\mu$ mol, 61%, *dr* 3.2:1) both as a colorless oil.

$R_f$  = 0.45 (PE:EA = 3:1;  $\text{KMnO}_4$ );  $^1\text{H NMR}$  (400 MHz,  $\text{CDCl}_3$ ):  $\delta$  (*major 7j*) = 6.20 (ddd,  $J$  = 9.8, 5.5, 1.9 Hz, 1H), 5.96 (ddd,  $J$  = 9.6, 4.3, 1.5 Hz, 1H), 5.50 – 5.30 (m, 1H), 5.01 – 4.69 (m, 1H), 4.32 – 4.10 (m, 2H), 3.65 (dd,  $J$  = 7.8, 3.6 Hz, 1H), 3.46 (dt,  $J$  = 4.5, 1.5 Hz, 1H), 3.34 (d,  $J$  = 3.6 Hz, 1H), 1.46 (s, 9H), 1.29 (t,  $J$  = 7.2 Hz, 3H) (signal broadening due to rotamers);  $^{13}\text{C NMR}$  (101 MHz,  $\text{CDCl}_3$ ):  $\delta$  (*major 7j*) = 169.3 (q), 152.2 (q), 129.8 (+), 125.1 (+), 118.0 (q), 117.2 (q), 82.6 (q), 62.0 (–), 57.1 (+), 55.9 (+), 45.1 (+), 41.4 (+), 37.1 (+), 28.1 (+), 14.2 (+) (signal broadening due to rotamers); *major 7j*: IR  $\tilde{\nu}$  [ $\text{cm}^{-1}$ ]: 2982, 2937, 2248, 1707, 1476, 1394, 1372, 1334, 1260, 1163, 1118, 1085, 1036, 977, 910, 760, 723; HRMS (ESI): calcd. for  $\text{C}_{17}\text{H}_{21}\text{N}_3\text{O}_4$  ( $\text{M}+\text{Na}$ ) $^+$ ,  $m/z$  = 354.1424; found 354.1424 (*major 7j*  $t_r$  = 2.424–2.474 min);  $^1\text{H NMR}$  (400 MHz,  $\text{CDCl}_3$ ):  $\delta$  (*minor 7j*) = 6.26 (dddd,  $J$  = 9.8, 5.5, 2.1, 0.9 Hz, 1H), 5.98 – 5.91 (m, 1H)\*, 5.28 – 5.24 (m, 1H), 4.96 – 4.75 (m, 1H)\*, 4.25 – 4.13 (m, 2H)\*, 3.29 (dd,  $J$  = 7.0, 5.6 Hz, 1H), 3.18 (dd,  $J$  = 7.0, 1.4 Hz, 1H), 3.08 (dt,  $J$  = 3.8, 1.6 Hz, 1H), 1.44 (s, 9H)\*, 1.29 – 1.25 (m, 3H)\* (signal broadening due to rotamers);  $^{13}\text{C NMR}$  (101 MHz,  $\text{CDCl}_3$ ):  $\delta$  (*minor 7j*) = 168.8 (q), 152.4 (q), 129.0 (+), 125.0 (+), 118.2 (q), 116.2 (q), 82.5 (q), 61.9 (–), 59.7 (+), 54.4 (+), 48.8 (+), 42.0 (+), 38.3 (+), 28.0 (+)\*, 14.1 (+)\* (signal broadening due to rotamers; \*these signals are overlapping with major diastereomer); HRMS (ESI): calcd. for  $\text{C}_{17}\text{H}_{21}\text{N}_3\text{O}_4$  ( $\text{M}+\text{Na}$ ) $^+$ ,  $m/z$  = 354.1424; found 354.1423 (*minor 7j*  $t_r$  = 2.483–2.520 min).

**Ethyl (1*R*,2*S*,5*R*,6*R*,7*S*)-6,7-dicyano-8-tosyl-8-azabicyclo[3.2.1]oct-3-ene-2-carboxylate (7k)**

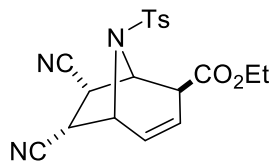

Following GP-1b-Conditions II, **7k** was prepared from cyclopropane **4e** (144 mg, 469  $\mu\text{mol}$ , 1.0 equiv) and maleonitrile (98.8 mg, 1.26 mmol, 2.7 equiv) in toluene (0.3 mL). The mixture was heated for 30 min at 150  $^{\circ}\text{C}$  under microwave irradiation. The crude product was purified by flash system (5  $\rightarrow$  21% EA:PE) to afford *endo* **7k** (110 mg, 285  $\mu\text{mol}$ , 61%) as a colorless solid.

$R_f$  = 0.52 (PE:EA = 3:2; UV,  $\text{KMnO}_4$ ); **m.p.** = 174  $^{\circ}\text{C}$ ;  $^1\text{H NMR}$  (400 MHz,  $\text{CDCl}_3$ ):  $\delta$  = 7.77 – 7.65 (m, 2H), 7.40 – 7.27 (m, 2H), 6.28 (ddd,  $J$  = 9.6, 5.9, 1.9 Hz, 1H), 6.05 (ddd,  $J$  = 9.6, 4.5, 1.4 Hz, 1H), 5.12 (dq,  $J$  = 7.5, 1.5 Hz, 1H), 4.73 (td,  $J$  = 5.7, 1.5 Hz, 1H), 3.97 (ddd,  $J$  = 13.6, 10.8, 7.3 Hz, 2H), 3.84 (dq,  $J$  = 10.8, 7.1 Hz, 1H), 3.75 (dd,  $J$  = 10.9, 5.5 Hz, 1H), 3.61 (dd,  $J$  = 4.2, 2.0 Hz, 1H), 2.44 (s, 3H), 1.13 (t,  $J$  = 7.1 Hz, 3H);  $^{13}\text{C NMR}$  (101 MHz,  $\text{CDCl}_3$ ):  $\delta$  = 168.6 (q), 145.3 (q), 134.7 (q), 129.9 (+), 128.7 (+), 128.0 (+), 125.5 (+), 115.9 (q), 115.0 (q), 61.8 (–), 58.8 (+), 56.3 (+), 46.5 (+), 40.7 (+), 35.3 (+), 21.7 (+), 13.9 (+); **IR**  $\tilde{\nu}$  [ $\text{cm}^{-1}$ ]: 2960, 2248, 1730, 1595, 1446, 1327, 1293, 1208, 1159, 1088, 1029, 980, 939, 898, 816, 760, 708, 664; **HRMS** (ESI): calcd. for  $\text{C}_{19}\text{H}_{19}\text{N}_3\text{O}_4\text{S}$  ( $\text{M}+\text{Na}$ ) $^+$ ,  $m/z$  = 408.0988; found 408.0987.

**8-(*Tert*-butyl) 2-methyl (1*R*,2*S*,5*R*,6*R*,7*S*)-6,7-dicyano-8-azabicyclo[3.2.1]oct-3-ene-2,8-dicarboxylate (*endo* (–)-7I)**

**8-(*Tert*-butyl) 2-methyl (1*R*,2*S*,5*R*,6*S*,7*R*)-6,7-dicyano-8-azabicyclo[3.2.1]oct-3-ene-2,8-dicarboxylate (*exo* (–)-7I)**

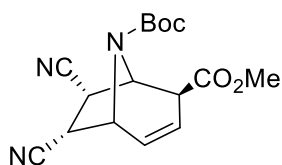

*endo* (–)-7I

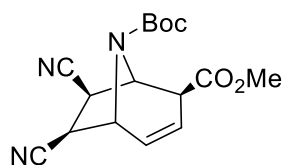

*exo* (–)-7I

Following GP-1b-Conditions II, (–)-**7I** was prepared from cyclopropane (–)-**4c** (150 mg, 627  $\mu\text{mol}$ , 1.0 equiv) and maleonitrile (132 mg, 1.69 mmol, 2.7 equiv) in toluene (0.3 mL). The

mixture was heated for 15 min at 150 °C under microwave irradiation. The crude product (diastereomeric ratio of *dr* 1:1) was purified by flash system (4 → 20% EA:PE) to afford *endo* (–)-**7I** (74.8 mg, 236 μmol, 38%, 99% *ee*) as a colorless solid and *exo* (–)-**7I** (66.1 mg, 208 μmol, 33%, 98% *ee*) as a colorless oil.

**endo** (–)-**7I**:  $R_f$  = 0.52 (PE:EA = 3:2; KMNO<sub>4</sub>); **m.p.** = 153 °C; **HPLC analysis**: 99% *ee* (Chiralcel OJ-H, *n*-heptane/*i*-propanol 70:30, 0.5 mL/min, 215 nm):  $t_r$  = 31.61 min;  $[\alpha]_D^{20}$  = -132.3 (c = 1.0 in CHCl<sub>3</sub>); **<sup>1</sup>H NMR** (400 MHz, CDCl<sub>3</sub>): δ = 6.31 (ddd, *J* = 9.8, 5.4, 1.9 Hz, 1H), 6.07 (ddd, *J* = 9.8, 4.3, 1.5 Hz, 1H), 5.22 (dq, *J* = 7.6, 1.3 Hz, 1H), 4.79 (t, *J* = 5.6 Hz, 1H), 3.78 (dd, *J* = 10.9, 7.7 Hz, 1H), 3.75 (s, 3H), 3.55 (dt, *J* = 4.4, 1.5 Hz, 1H), 3.42 (dd, *J* = 10.8, 5.6 Hz, 1H), 1.42 (s, 9H); **<sup>13</sup>C NMR** (101 MHz, CDCl<sub>3</sub>): δ = 169.9 (q), 152.0 (q), 129.2 (+), 125.5 (+), 116.0 (q), 115.2 (q), 82.3 (q), 56.0 (+), 53.7 (+), 52.7 (+), 45.1 (+), 39.6 (+), 35.4 (+), 28.1 (+) (signal broadening due to rotamers); **IR**  $\tilde{\nu}$  [cm<sup>-1</sup>]: 2978, 2251, 1737, 1700, 1394, 1342, 1260, 1163, 1118, 731; **HRMS** (ESI): calcd. for C<sub>16</sub>H<sub>19</sub>N<sub>3</sub>O<sub>4</sub> (M+Na)<sup>+</sup>, *m/z* = 340.1268; found 340.1271.

**exo** (–)-**7I**:  $R_f$  = 0.29 (PE:EA = 3:2; KMNO<sub>4</sub>); **HPLC analysis**: 98% *ee* (Phenomenex Lux Cellulose-1, *n*-heptane/*i*-propanol 70:30, 0.5 mL/min, 215 nm):  $t_r$  (*major*) = 42.56 min,  $t_r$  (*minor*) = 24.21 min;  $[\alpha]_D^{20}$  = -60.0 (c = 1.0 in CHCl<sub>3</sub>); **<sup>1</sup>H NMR** (300 MHz, CDCl<sub>3</sub>): δ = 6.23 – 6.08 (m, 1H), 5.82 (dd, *J* = 9.6, 4.1 Hz, 1H), 5.42 – 5.23 (m, 1H), 5.16 – 4.77 (m, 1H), 3.74 (s, 3H), 3.54 (d, *J* = 8.5 Hz, 1H), 3.36 (d, *J* = 8.3 Hz, 1H), 3.12 – 3.01 (m, 1H), 1.47 (s, 9H) (signal doubling and broadening due to rotamers); **<sup>13</sup>C NMR** (101 MHz, CDCl<sub>3</sub>): δ = 169.3 (q), 152.1 (q), 129.9 (+), 124.2 (+), 123.9 (+), 117.2 (q), 116.6 (q), 82.3 (q), 59.4 (+), 58.6 (+), 57.4 (+), 56.4 (+), 52.7 (+), 48.6 (+), 48.3 (+), 41.4 (+), 38.4 (+), 37.5 (+), 28.0 (+) (signal doubling and broadening due to rotamers); **IR**  $\tilde{\nu}$  [cm<sup>-1</sup>]: 2960, 2930, 2244, 1733, 1670, 1394, 1338, 1238, 1156, 1118, 1066; **HRMS** (ESI): calcd. for C<sub>16</sub>H<sub>19</sub>N<sub>3</sub>O<sub>4</sub> (M+Na)<sup>+</sup>, *m/z* = 340.1268; found 340.1268.

**8-(*Tert*-butyl) 2-methyl (1*R*,2*S*,5*R*,6*R*,7*S*)-6,7-dicyano-8-azabicyclo[3.2.1]oct-3-ene-2,8-dicarboxylate (*endo* **7I**)**

**8-(*Tert*-butyl) 2-methyl (1*R*,2*S*,5*R*,6*S*,7*R*)-6,7-dicyano-8-azabicyclo[3.2.1]oct-3-ene-2,8-dicarboxylate (*exo* **7I**)**

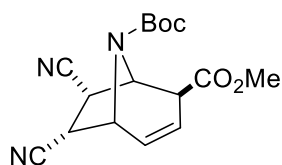

*endo* **7I**

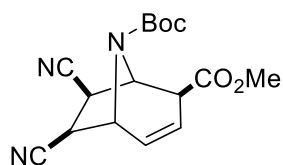

*exo* **7I**

Following GP-1b-Conditions II, **7I** was prepared from cyclopropane **4c** (158 mg, 660  $\mu$ mol, 1.0 equiv) and maleonitrile (139 mg, 1.78 mmol, 2.7 equiv) in toluene (0.3 mL). The mixture was heated for 15 min at 150 °C under microwave irradiation. The crude product (diastereomeric ratio of *dr* 1:1) was purified by flash system (4  $\rightarrow$  20% EA:PE) to afford *endo* **7I** (76.4 mg, 241  $\mu$ mol, 36%) as a colorless solid and *exo* **7I** (70.0 mg, 221  $\mu$ mol, 33%) as a colorless oil.

NMR, m.p. and IR data were identical with those reported for the enantiomers (–)-**7I**.

**Ethyl (1*S*,2*S*,5*R*)-7,8-ditosyl-8-azabicyclo[3.2.1]octa-3,6-diene-2-carboxylate (*major* **7m**)**

**Ethyl (1*S*,2*S*,5*R*)-6,8-ditosyl-8-azabicyclo[3.2.1]octa-3,6-diene-2-carboxylate (*minor* **7m**)**

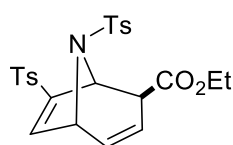

*major* **7m**

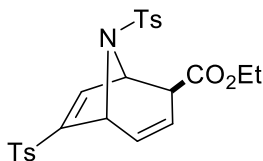

*minor* **7m**

Following GP-1b-Conditions II, **7m** was prepared from cyclopropane **4e** (252 mg, 818  $\mu$ mol, 1.0 equiv) and tosylacetylene (399 mg, 2.21 mmol, 2.7 equiv) in toluene (0.3 mL). The mixture was heated for 30 min at 150 °C under microwave irradiation. The crude product (diastereomeric ratio of *dr* 4.0:1) was purified by flash system (17  $\rightarrow$  25% EA:PE) to afford *major* **7m** (30.0 mg, 61.5  $\mu$ mol, 8%) as a colorless solid and mixture of *major* and *minor* **7m** (62.3 mg, 128  $\mu$ mol, 16%, *dr* 1.7:1) as a colorless oil.



$R_f = 0.46$  (PE:EA = 2:1;  $\text{KMnO}_4$ ); **m.p.** = 49 °C;  $^1\text{H NMR}$  (400 MHz,  $\text{CDCl}_3$ ):  $\delta$  (*major 7m*) = 7.64 (d,  $J = 8.3$  Hz, 2H), 7.44 (d,  $J = 8.3$  Hz, 2H), 7.37 (d,  $J = 8.1$  Hz, 2H), 7.15 (d,  $J = 8.1$  Hz, 2H), 6.89 (d,  $J = 2.3$  Hz, 1H), 6.23 (ddd,  $J = 9.5, 5.7, 2.1$  Hz, 1H), 5.71 (ddd,  $J = 9.5, 4.0, 1.6$  Hz, 1H), 5.35 (bs, 1H), 4.73 (dd,  $J = 5.8, 2.3$  Hz, 1H), 4.17 (q,  $J = 7.1$  Hz, 2H), 3.27 (ddd,  $J = 3.5, 2.1, 1.0$  Hz, 1H), 2.49 (s, 3H), 2.41 (s, 3H), 1.27 (t,  $J = 7.2$  Hz, 3H);  $^{13}\text{C NMR}$  (101 MHz,  $\text{CDCl}_3$ ):  $\delta$  (*major 7m*) = 168.8 (q), 148.0 (+), 145.3 (q), 143.9 (q), 142.3 (q), 135.8 (q), 134.7 (q), 130.04 (+), 129.8 (+), 128.9 (+), 128.2 (+), 127.8 (+), 125.6 (+), 62.2 (+), 61.8 (-), 60.0 (+), 44.7 (+), 21.8 (+), 21.6 (+), 14.1(+); *major 7m*: **IR**  $\tilde{\nu}$  [ $\text{cm}^{-1}$ ]: 3060, 2982, 2926, 1737, 1595, 1450, 1353, 1305, 1230, 1152, 1096, 1040, 969, 731, 645; **HRMS** (ESI): calcd. for  $\text{C}_{24}\text{H}_{25}\text{NO}_6\text{S}_2$  ( $\text{M}+\text{Na}$ ) $^+$ ,  $m/z = 510.1016$ ; found 510.1015 (*major 7m*  $t_r = 2.926$ - $2.972$  min);  $^1\text{H NMR}$  (400 MHz,  $\text{CDCl}_3$ ):  $\delta$  (*minor 7m*) = 7.53 – 7.49 (m, 2H), 7.35 – 7.31 (m, 4H)\*, 7.18 (d,  $J = 8.1$  Hz, 2H), 6.25 (d,  $J = 2.5$  Hz, 1H), 6.14 (ddd,  $J = 9.5, 5.7, 2.1$  Hz, 1H), 5.54 (ddd,  $J = 9.5, 3.9, 1.5$  Hz, 1H), 5.20 (d,  $J = 1.1$  Hz, 1H), 4.81 (d,  $J = 5.7$  Hz, 1H), 4.21 – 4.11 (m, 2H)\*, 2.88 (ddd,  $J = 3.5, 2.1, 0.9$  Hz, 1H), 2.46 (s, 3H), 2.40 (s, 3H)\*, 1.29 – 1.22 (m, 3H)\*;  $^{13}\text{C NMR}$  (101 MHz,  $\text{CDCl}_3$ ):  $\delta$  (*minor 7m*) = 169.0 (q), 155.5 (q), 145.4 (q), 144.0 (q), 135.6 (q), 134.9 (+), 134.4 (q), 131.7 (+), 130.02 (+), 129.9 (+), 128.3 (+), 127.9 (+), 122.5 (+), 62.7 (+), 62.0 (-), 58.9 (+), 42.9 (+), 21.8 (+)\*, 21.6 (+)\*, 14.1 (+)\* (\*these signals are overlapping with *major* diastereomer); **HRMS** (ESI): calcd. for  $\text{C}_{24}\text{H}_{25}\text{NO}_6\text{S}_2$  ( $\text{M}+\text{Na}$ ) $^+$ ,  $m/z = 510.1016$ ; found 510.1015 (*major and minor 7m*  $t_r = 2.926$ - $2.972$  min).

**4-Ethyl 1,6,7-trimethyl (1R,4S,5S)-8-oxabicyclo[3.2.1]octa-2,6-diene-1,4,6,7-tetracarboxylate ((+)-8a)**

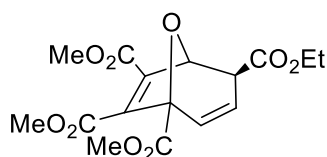

Following GP-1a-Conditions I, **(+)-8a** was prepared from cyclopropane **(-)-5a** (1.67 g, 7.87 mmol, 1.0 equiv) and DMAD (3.02 g, 2.60 mL, 21.3 mmol, 2.7 equiv). The mixture was heated for 30 min at 170 °C under microwave irradiation. The crude product was purified by flash system (6 → 37% EA:PE) to afford cycloadduct **(+)-8a** (1.98 g, 5.59 mmol, 71%, 99% ee) as a colorless solid.

$R_f = 0.21$  (PE:EA = 3:1;  $\text{KMnO}_4$ ); **m.p.** = 64 °C; **HPLC analysis**: 99% ee (Chiralcel AS-H, *n*-heptane/*i*-propanol 90:10, 1.0 mL/min, 215 nm):  $t_r$  (*major*) = 18.96 min,  $t_r$  (*minor*) = 24.37 min;  $[\alpha]_D^{20} = +128.7$  ( $c = 1.0$  in  $\text{CHCl}_3$ );  $^1\text{H NMR}$  (300 MHz,  $\text{CDCl}_3$ ):  $\delta = 6.59$  (dd,  $J = 9.8, 2.3$  Hz, 1H), 5.89 (ddd,  $J = 9.8, 4.2, 1.9$  Hz, 1H), 5.76 (d,  $J = 1.8$  Hz, 1H), 4.24 (q,  $J = 7.2$  Hz, 2H), 3.83

(s, 3H), 3.82 (s, 3H), 3.80 (s, 3H), 3.02 (dd,  $J = 4.0, 2.1$  Hz, 1H), 1.29 (t,  $J = 7.2$  Hz, 3H).  $^{13}\text{C}$  NMR (75 MHz,  $\text{CDCl}_3$ ):  $\delta = 169.5$  (q), 166.7 (q), 162.2 (q), 162.0 (q), 150.2 (q), 134.7 (q), 130.7 (+), 124.1 (+), 86.1 (q), 80.7 (+), 61.9 (–), 53.2 (+), 52.9 (+), 52.7 (+), 40.6 (+), 14.2 (+); IR  $\tilde{\nu}$  [ $\text{cm}^{-1}$ ]: 2989, 2960, 1722, 1655, 1439, 1368, 1260, 1193, 1144, 1029, 850, 727, 667; HRMS (ESI): calcd. for  $\text{C}_{16}\text{H}_{18}\text{O}_9$  ( $\text{M}+\text{H}$ ) $^+$ ,  $m/z = 355.1024$ ; found 355.1032.

**4-Ethyl 1,6,7-trimethyl (1*R*,4*S*,5*S*)-8-oxabicyclo[3.2.1]octa-2,6-diene-1,4,6,7-tetracarboxylate (8a)**

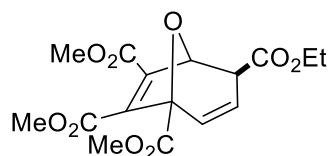

Following GP-1a-Conditions I, **8a** was prepared from cyclopropane **5a** (215 mg, 1.01 mmol, 1.0 equiv) and DMAD (389 mg, 335  $\mu\text{L}$ , 2.74 mmol, 2.7 equiv). The mixture was heated for 30 min at 170  $^\circ\text{C}$  under microwave irradiation. The crude product was purified by flash system (6  $\rightarrow$  37% EA:PE) to afford cycloadduct **8a** (250 mg, 706  $\mu\text{mol}$ , 70%) as a colorless solid.

NMR, m.p. and IR data were identical with those reported for the enantiomer (+)-**8a**.

**4-(*Tert*-butyl) 1,6,7-trimethyl (1*R*,4*S*,5*S*)-8-oxabicyclo[3.2.1]octa-2,6-diene-1,4,6,7-tetracarboxylate (8b)**

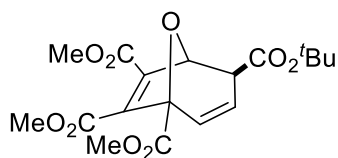

Following GP-1a-Conditions I, **8b** was prepared from cyclopropane **5b** (607 mg, 2.53 mmol, 1.0 equiv) and DMAD (969 mg, 836  $\mu\text{L}$ , 6.82 mmol, 2.7 equiv). The mixture was heated for 30 min at 170  $^\circ\text{C}$  under microwave irradiation. The crude product was purified by flash system (6  $\rightarrow$  37% EA:PE) to afford cycloadduct **8b** (726 mg, 1.90 mmol, 75%) as a colorless oil.

$R_f$  = 0.62 (PE:EA = 2:1;  $\text{KMnO}_4$ );  $^1\text{H NMR}$  (300 MHz,  $\text{CDCl}_3$ ):  $\delta$  = 6.57 (dd,  $J$  = 9.8, 2.3 Hz, 1H), 5.84 (ddd,  $J$  = 9.8, 4.1, 1.9 Hz, 1H), 5.70 (d,  $J$  = 1.8 Hz, 1H), 3.81 (s, 6H), 3.79 (s, 3H), 2.93 (ddd,  $J$  = 4.1, 2.3, 0.7 Hz, 1H), 1.47 (s, 9H);  $^{13}\text{C NMR}$  (75 MHz,  $\text{CDCl}_3$ ):  $\delta$  = 168.4 (q), 166.8 (q), 162.11 (q), 162.08 (q), 149.6 (q), 135.2 (q), 130.3 (+), 124.5 (+), 85.9 (q), 82.4 (q), 80.7 (+), 53.1 (+), 52.7 (+), 52.6 (+), 41.3 (+), 28.0 (+); **IR**  $\tilde{\nu}$  [ $\text{cm}^{-1}$ ]: 2960, 1722, 1651, 1439, 1245, 1200, 1148, 1077, 1006, 731; **HRMS** (ESI): calcd. for  $\text{C}_{18}\text{H}_{22}\text{O}_9$  ( $\text{M}+\text{H}$ ) $^+$ ,  $m/z$  = 383.1337; found 383.1336.

**7-(Tert-butyl) 4-methyl (3aS,4R,7S,8R,8aR)-1,3-dioxo-2-phenyl-2,3,3a,7,8,8a-hexahydro-4,8-epoxycyclohepta[c]pyrrole-4,7(1H)-dicarboxylate (major 8c)**

**7-(Tert-butyl) 4-methyl (3aR,4R,7S,8R,8aS)-1,3-dioxo-2-phenyl-2,3,3a,7,8,8a-hexahydro-4,8-epoxycyclohepta[c]pyrrole-4,7(1H)-dicarboxylate (minor 8c)**

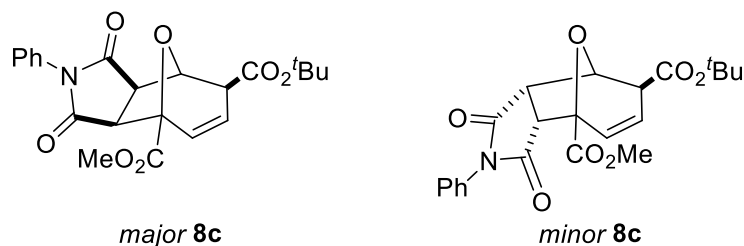

Following GP-1b-Conditions II, **8c** was prepared from cyclopropane **5b** (100 mg, 416  $\mu\text{mol}$ , 1.0 equiv) and *N*-phenylmaleimide (195 mg, 1.12 mmol, 2.7 equiv) in toluene (1 mL). The mixture was heated for 1.5 h at 150  $^\circ\text{C}$  under microwave irradiation. The crude product (diastereomeric ratio of *dr* 2.9:1) was purified by flash column chromatography (33% EA:PE) to afford inseparable mixture of *major* and *minor 8c* (124 mg, 299  $\mu\text{mol}$ , 72%, *dr* 2.8:1) as a colorless solid. Recrystallization from toluene led to separation of pure *major 8c* (47 mg, 114  $\mu\text{mol}$ , 27%) as a colorless solid.

$R_f$  = 0.23 (PE:EA = 1:1;  $\text{KMnO}_4$ ); **m.p.** = 144  $^\circ\text{C}$ ;  $^1\text{H NMR}$  (400 MHz,  $\text{CDCl}_3$ ):  $\delta$  (*major 8c*) = 7.51 – 7.36 (m, 3H), 7.29 – 7.27 (m, 2H, overlapping with solvent signal), 6.55 (dd,  $J$  = 9.9, 2.1 Hz, 1H), 5.98 (ddd,  $J$  = 9.9, 4.5, 1.6 Hz, 1H), 5.49 (bs, 1H), 3.86 (s, 3H), 3.79 (d,  $J$  = 7.5 Hz, 1H), 3.36 (dd,  $J$  = 7.5, 1.0 Hz, 1H), 2.93 (ddd,  $J$  = 4.5, 2.1, 0.7 Hz, 1H), 1.48 (s, 9H);  $^{13}\text{C NMR}$  (101 MHz,  $\text{CDCl}_3$ ):  $\delta$  (*major 8c*) = 175.3 (q), 172.8 (q), 168.2 (q), 167.4 (q), 131.41 (+), 131.36 (q), 129.2 (+), 129.0 (+), 126.4 (+), 123.8 (+), 83.0 (q), 82.5 (q), 79.5 (+), 57.5 (+), 53.1 (+), 50.3 (+), 47.1 (+), 28.1 (+); *major 8c*: **IR**  $\tilde{\nu}$  [ $\text{cm}^{-1}$ ]: 2974, 1711, 1372, 1204, 1156, 1096, 1070, 846, 731; **HRMS** (ESI): calcd. for  $\text{C}_{22}\text{H}_{23}\text{NO}_7$  ( $\text{M}+\text{H}$ ) $^+$ ,  $m/z$  = 414.1547; found 414.1548

(*major 8c*  $t_r$  = 2.636-2.644 min);  $^1\text{H NMR}$  (400 MHz,  $\text{CDCl}_3$ ):  $\delta$  (*minor 8c*) = 7.44 – 7.36 (m, 3H)\*, 7.22 – 7.17 (m, 2H), 6.41 (dd,  $J$  = 10.0, 2.1 Hz, 1H), 6.11 (ddd,  $J$  = 10.0, 4.6, 1.7 Hz, 1H), 5.48 (dd,  $J$  = 9.1, 1.4 Hz, 1H)\*, 4.11 (dd,  $J$  = 9.6, 8.6 Hz, 1H), 3.96 (d,  $J$  = 9.5 Hz, 1H), 3.91 (s, 3H), 3.27 (dd,  $J$  = 4.7, 2.1 Hz, 1H), 1.46 (s, 9H);  $^{13}\text{C NMR}$  (101 MHz,  $\text{CDCl}_3$ ):  $\delta$  (*minor 8c*) = 174.4 (q), 171.5 (q), 168.5 (q), 168.0 (q), 131.36 (q)\*, 129.3 (+), 129.1 (+), 127.9 (+), 126.32 (+), 126.30 (+), 82.3 (q), 80.7 (q), 76.7 (+), 57.8 (+), 53.4 (+), 49.7 (+), 43.2 (+), 28.0 (+)\* (\*these signals are overlapping with major diastereomer); **HRMS** (ESI): calcd. for  $\text{C}_{22}\text{H}_{23}\text{NO}_7$  ( $\text{M}+\text{H}$ ) $^+$ ,  $m/z$  = 414.1547; found 414.1552 (*minor 8c*  $t_r$  = 2.686-2.732 min).

**4-Ethyl 1-methyl (1R,4S,5R,6R,7R)-6,7-dicyano-8-oxabicyclo[3.2.1]oct-2-ene-1,4-dicarboxylate (*major (-)-8d*)**

**4-Ethyl 1-methyl (1R,4S,5R,6S,7S)-6,7-dicyano-8-oxabicyclo[3.2.1]oct-2-ene-1,4-dicarboxylate (*minor 8d*)**

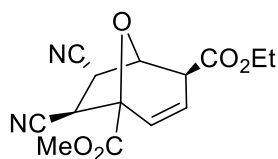

*major (-)-8d*

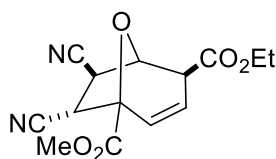

*minor 8d*

Following GP-1b-Conditions II, **8d** was prepared from cyclopropane (**-**)-**5a** (566 mg, 2.67 mmol, 1.0 equiv) and fumaronitrile (562 mg, 7.20 mmol, 2.7 equiv) in toluene (0.5 mL). The mixture was heated for 15 min at 170 °C under microwave irradiation. The crude mixture (diastereomeric ratio of *dr* 3.7:1) was recrystallized from toluene to obtain pure *major (-)-8d* (390 mg, 1.34 mmol, 50%, 99% *ee*) as a colorless solid. The filtrate was concentrated under reduced pressure. The residue was purified by flash system (17 → 20% EA:PE) to afford inseparable mixture of *major* and *minor 8d* (181 mg, 624  $\mu\text{mol}$ , 23%, *dr* 1:1) as a colorless solid.

$R_f$  = 0.47 (PE:EA = 2:1,  $\text{KMnO}_4$ ); **m.p.** = 165 °C; **HPLC analysis**: 99% *ee* (Chiralpak AS-H, *n*-heptane/*i*-propanol 50:50, 0.5 mL/min, 215 nm):  $t_r$  = 25.61 min;  $[\alpha]_D^{20}$  = -31.4 ( $c$  = 1.0 in  $\text{CHCl}_3$ );  $^1\text{H NMR}$  (300 MHz,  $\text{CDCl}_3$ ):  $\delta$  (*major (-)-8d*) = 6.33 (dd,  $J$  = 9.8, 2.0 Hz, 1H), 6.19 (ddd,  $J$  = 9.8, 4.7, 1.6 Hz, 1H), 5.57 (d,  $J$  = 7.9 Hz, 1H), 4.23 (q,  $J$  = 7.1 Hz, 2H), 3.93 (s, 3H), 3.87 (dd,  $J$  = 8.0, 3.5 Hz, 1H), 3.75 (d,  $J$  = 3.5 Hz, 1H), 3.35 (dd,  $J$  = 4.7, 1.8 Hz, 1H), 1.29 (t,  $J$  = 7.1 Hz, 3H);  $^{13}\text{C NMR}$  (75 MHz,  $\text{CDCl}_3$ ):  $\delta$  (*major (-)-8d*) = 168.5 (q), 166.2 (q), 128.9 (+), 125.5 (+), 116.4 (q), 115.9 (q), 84.0 (q), 76.3 (+), 62.16 (-), 53.8 (+), 45.0 (+), 43.3 (+), 36.6

(+), 14.1 (+); *major (-)-8d*: IR  $\tilde{\nu}$  [cm<sup>-1</sup>]: 3086, 2993, 2251, 1759, 1722, 1439, 1327, 1264, 1193, 1111, 1085, 1028, 839, 887, 731; HRMS (ESI): calcd. for C<sub>14</sub>H<sub>14</sub>N<sub>2</sub>O<sub>5</sub> (M+Na)<sup>+</sup>, m/z = 313.0795; found 313.0798 (*major (-)-8d* t<sub>r</sub> = 1.866-1.870 min); <sup>1</sup>H NMR (400 MHz, CDCl<sub>3</sub>):  $\delta$  (*minor 8d*) = 6.42 (dd, J = 9.9, 2.0 Hz, 1H), 6.23 – 6.14 (m, 1H)\*, 5.48 – 5.42 (m, 1H), 4.31 – 4.18 (m, 2H)\*, 3.91 (s, 3H), 3.62 (d, J = 7.4 Hz, 1H), 3.38 – 3.31 (m, 1H)\*, 3.01 (dd, J = 4.8, 2.0 Hz, 1H), 1.32 – 1.26 (m, 3H)\*; <sup>13</sup>C NMR (101 MHz, CDCl<sub>3</sub>):  $\delta$  (*minor 8d*) = 168.0 (q), 166.1 (q), 127.9 (+), 125.1 (+), 117.1 (q), 114.8 (q), 81.9 (q), 79.5 (+), 62.22 (-), 53.9 (+), 46.9 (+), 45.9 (+), 38.1 (+), 14.1 (+)\* (\*these signals are overlapping with major diastereomer); HRMS (ESI): calcd. for C<sub>14</sub>H<sub>14</sub>N<sub>2</sub>O<sub>5</sub> (M+Na)<sup>+</sup>, m/z = 313.0795; found 313.0796 (*minor 8d* t<sub>r</sub> = 1.913-2.005 min).

**4-Ethyl 1-methyl (1R,4S,5R,6R,7R)-6,7-dicyano-8-oxabicyclo[3.2.1]oct-2-ene-1,4-dicarboxylate (*major 8d*)**

**4-Ethyl 1-methyl (1R,4S,5R,6S,7S)-6,7-dicyano-8-oxabicyclo[3.2.1]oct-2-ene-1,4-dicarboxylate (*minor 8d*)**

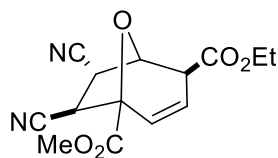

*major 8d*

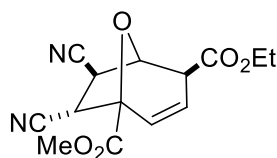

*minor 8d*

Following GP-1b-Conditions II, **8d** was prepared from cyclopropane **5a** (268 mg, 1.26 mmol, 1.0 equiv) and fumaronitrile (266 mg, 3.41 mmol, 2.7 equiv) in toluene (0.25 mL). The mixture was heated for 15 min at 170 °C under microwave irradiation. The crude mixture (diastereomeric ratio of *dr* 3.6:1) was recrystallized from toluene to obtain pure *major 8d* (179 mg, 1.26 mmol, 49%) as a colorless solid. The filtrate was concentrated under reduced pressure. The residue was purified by flash system (17 → 20% EA:PE) to afford inseparable mixture of *major* and *minor 8d* (80.7 mg, 278  $\mu$ mol, 22%, *dr* 1:1) as a colorless solid.

NMR, m.p. and IR data were identical with those reported for the enantiomer (-)-**8d**.

**4-Ethyl 1-methyl (1*R*,4*S*,5*S*)-6-tosyl-8-oxabicyclo[3.2.1]octa-2,6-diene-1,4-dicarboxylate (8e)**

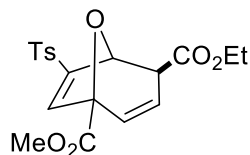

Following GP-1b-Conditions II, **8e** was prepared from cyclopropane **5a** (109 mg, 514  $\mu$ mol, 1.0 equiv) and tosylacetylene (250 mg, 1.39 mmol, 2.7 equiv) in toluene (0.2 mL). The mixture was heated for 30 min at 160 °C under microwave irradiation. The crude product was purified by flash system (8  $\rightarrow$  35% EA:PE) to afford cycloadduct **8e** (92.0 mg, 234  $\mu$ mol, 46%) as a colorless oil.

$R_f$  = 0.50 (PE:EA = 3:2; KMnO<sub>4</sub>); **<sup>1</sup>H NMR** (300 MHz, CDCl<sub>3</sub>):  $\delta$  = 7.78 (d,  $J$  = 8.3 Hz, 2H), 7.36 (d,  $J$  = 8.5 Hz, 2H), 7.30 (s, 1H), 6.37 (dd,  $J$  = 9.7, 2.2 Hz, 1H), 5.89 (dddd,  $J$  = 9.7, 4.1, 2.0, 0.8 Hz, 1H), 5.54 (d,  $J$  = 1.8 Hz, 1H), 4.29 – 4.14 (m, 2H), 3.81 (s, 3H), 3.22 (dd,  $J$  = 3.9, 2.4 Hz, 1H), 2.45 (s, 3H), 1.28 (t,  $J$  = 7.1 Hz, 3H); **<sup>13</sup>C NMR** (75 MHz, CDCl<sub>3</sub>):  $\delta$  = 169.3 (q), 167.4 (q), 147.2 (+), 145.7 (q), 144.0 (q), 135.6 (q), 130.3 (+), 130.1 (+), 128.1 (+), 125.1 (+), 85.5 (q), 79.5 (+), 61.9 (–), 53.2 (+), 41.5 (+), 21.7 (+), 14.1 (+); **IR**  $\tilde{\nu}$  [cm<sup>-1</sup>]: 3086, 2982, 2926, 1733, 1595, 1439, 1402, 1368, 1305, 1215, 1148, 1118, 1025, 969, 943, 880, 816, 671; **HRMS** (ESI): calcd. for C<sub>19</sub>H<sub>20</sub>O<sub>7</sub>S (M+H)<sup>+</sup>,  $m/z$  = 393.1003; found 393.1003.

## Screening of various dipolarophiles with different electronic distributions

**Table 1.** Screening of cycloaddition with various dipolarophiles and monocyclopropanated furan **5a**.

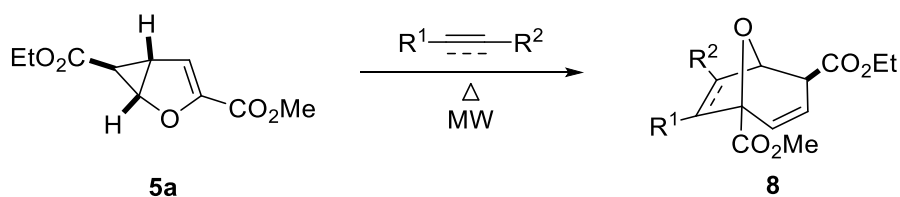

| Entry | R <sup>1</sup> -C≡C-R <sup>2</sup> | T [°C]    | Time [h] | Product            |
|-------|------------------------------------|-----------|----------|--------------------|
| 1     |                                    | 170       | 1        | partial conversion |
| 2     |                                    | 150       | 0.5      | -                  |
| 3     |                                    | 150 → 170 | 2.5      | complex mixture    |
| 4     |                                    | 150       | 1.5      | complex mixture    |
| 5     |                                    | 170       | 1        |                    |
| 6     |                                    | 150       | 3        | no conversion      |
| 7     |                                    | 150 → 170 | 2        | complex mixture    |
| 8     |                                    | 170       | 0.5      | complex mixture    |
| 9     |                                    | 150 → 170 | 1 → 1    | decomposition      |
| 10    |                                    | 150 → 160 | 1 → 2    | no conversion      |
| 11    |                                    | 170       | 1.5      | no conversion      |
| 12    |                                    | 150       | 3        | no conversion      |
| 13    |                                    | 170       | 1        | decomposition      |

**Table 2.** Screening of cycloaddition with various dipolarophiles and monocyclopropanated pyrrole **4e**.

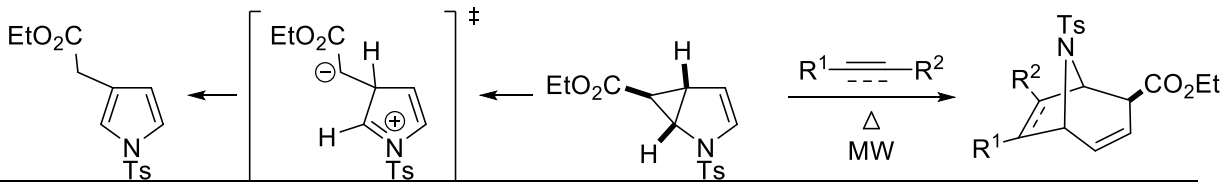

The reaction scheme illustrates the synthesis of product **7** from a substituted pyrrole. The starting material is a pyrrole ring with a Ts group on the nitrogen and an EtO<sub>2</sub>C group at the 2-position. It reacts with a dipolarophile (R<sup>1</sup>-C≡C-R<sup>2</sup>) to form a dipole intermediate, which then undergoes cycloaddition to form the monocyclopropanated pyrrole intermediate **4e**. Intermediate **4e** is then treated with microwave irradiation (MW) and heat (Δ) to yield the final product **7**, which is a bicyclic system with a Ts group on the nitrogen, an EtO<sub>2</sub>C group, and R<sup>1</sup> and R<sup>2</sup> substituents.

| Entry | R <sup>1</sup> -C≡C-R <sup>2</sup>                                                  | T [°C]    | Time [h] | Product         |
|-------|-------------------------------------------------------------------------------------|-----------|----------|-----------------|
| 1     |    | 180       | 0.25     | rearomatization |
| 2     |    | 200       | 1        | rearomatization |
| 3     |    | 135       | 0.25     | -               |
| 4     |    | 150       | 1        | rearomatization |
| 5     |    | 100 → 130 | 0.25 → 1 | no conversion   |
| 6     |   | 150       | 1        | -               |
| 7     |  | 180       | 1        | -               |
| 8     |  | 150       | 1        | rearomatization |
| 9     |  | 150       | 0.5      | rearomatization |
| 10    |  | 150 → 200 | 1        | rearomatization |



### 2.3. Derivatization reactions

#### 5-Ethyl 1,7,8-trimethyl (1*S*,2*R*,4*R*,5*R*,6*S*)-3,9-dioxatricyclo[4.2.1.0<sup>2,4</sup>]non-7-ene-1,5,7,8-tetracarboxylate (**10**)

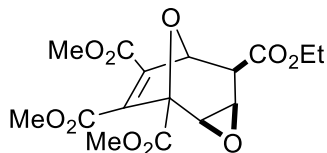

Cycloadduct **8a** (113 mg, 318  $\mu$ mol, 1.0 equiv) was dissolved in  $\text{CH}_2\text{Cl}_2$  (4 mL) and *m*-CPBA (193 mg, 1.12 mmol, 3.5 equiv) was added at 25 °C. The reaction mixture was stirred for 18 h at 50 °C. The reaction was quenched with saturated aqueous sodium thiosulfate and the aqueous layer was extracted with  $\text{CH}_2\text{Cl}_2$  (3 x 5 mL). The combined organic phases were washed with saturated  $\text{NaHCO}_3$  (2 x 20 mL), brine (2 x 20 mL) and dried over  $\text{Na}_2\text{SO}_4$ . The solvent was removed under reduced pressure and the crude product (117 mg, 316  $\mu$ mol, 99%) was obtained as a yellowish oil. Recrystallization from diethyl ether afforded pure product **10** (105 mg, 283  $\mu$ mol, 89%) as a colorless solid.

$R_f$  = 0.32 (PE:EA = 3:2; UV,  $\text{KMnO}_4$ ); **m.p.** = 91 °C;  $^1\text{H NMR}$  (300 MHz,  $\text{CDCl}_3$ ):  $\delta$  = 5.59 (s, 1H), 4.40 – 4.21 (m, 2H), 3.86 (s, 3H), 3.83 (s, 3H), 3.81 (s, 3H), 3.78 (d,  $J$  = 3.9 Hz, 1H), 3.53 (ddt,  $J$  = 5.3, 3.9, 1.2 Hz, 1H), 2.79 (d,  $J$  = 5.2 Hz, 1H), 1.32 (t,  $J$  = 7.1 Hz, 3H);  $^{13}\text{C NMR}$  (75 MHz,  $\text{CDCl}_3$ ):  $\delta$  = 168.7 (q), 166.2 (q), 162.1 (q), 161.6 (q), 143.8 (q), 138.9 (q), 86.1 (q), 80.2 (+), 62.0 (–), 53.4 (+), 53.1 (+), 52.9 (+), 50.3 (+), 47.6 (+), 38.2 (+), 14.2 (+); **IR**  $\tilde{\nu}$  [ $\text{cm}^{-1}$ ]: 2960, 1722, 1655, 1435, 1297, 1260, 1193, 1141, 1081, 1029, 980, 910, 842, 790, 712; **HRMS** (ESI): calcd. for  $\text{C}_{16}\text{H}_{18}\text{O}_{10}$  ( $\text{M}+\text{H}$ )<sup>+</sup>,  $m/z$  = 371.0973; found 371.0973.

#### 4-Ethyl 1,6,7-trimethyl (1*S*,2*R*,5*S*)-2-hydroxy-8-oxabicyclo[3.2.1]octa-3,6-diene-1,4,6,7-tetracarboxylate (**11**)

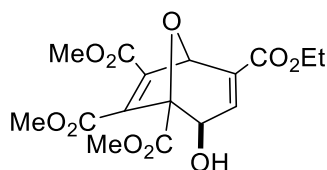

Flash column chromatography (33  $\rightarrow$  50% EA:PE + 1% TEA) of epoxide **10** (87.0 mg, 246  $\mu$ mol, 1.0 equiv) resulted in allylic alcohol **11** (58.0 mg, 157  $\mu$ mol, 64%) as a colorless oil.

$R_f$  = 0.28 (PE:EA = 1:1; UV,  $\text{KMnO}_4$ );  $^1\text{H NMR}$  (400 MHz,  $\text{CDCl}_3$ ):  $\delta$  = 6.70 (dd,  $J$  = 3.7, 0.8 Hz, 1H), 5.70 (d,  $J$  = 0.8 Hz, 1H), 4.60 – 4.44 (m, 1H), 4.37 – 4.16 (m, 2H), 3.87 (s, 3H), 3.85 (s, 3H), 3.76 (s, 3H), 2.73 (s, 1H), 1.31 (t,  $J$  = 7.1 Hz, 3H);  $^{13}\text{C NMR}$  (101 MHz,  $\text{CDCl}_3$ ):  $\delta$  = 166.4 (q), 163.12 (q), 163.05 (q), 160.8 (q), 147.1 (q), 139.6 (q), 137.8 (q), 135.6 (+), 92.1 (q), 77.9 (+), 63.5 (+), 61.4 (–), 53.2 (+), 53.0 (+), 52.7 (+), 14.2 (+);  $\text{IR } \tilde{\nu}$  [ $\text{cm}^{-1}$ ]: 3478, 2960, 1726, 1651, 1439, 1275, 1162, 1059, 1021;  $\text{HRMS}$  (ESI): calcd. for  $\text{C}_{16}\text{H}_{18}\text{O}_{10}$  ( $\text{M}+\text{H}$ ) $^+$ ,  $m/z$  = 371.0973; found 371.0973.

**4-(*Tert*-butyl) 1,6,7-trimethyl (1*R*,5*S*)-8-oxabicyclo[3.2.1]octa-3,6-diene-1,4,6,7-tetracarboxylate (12)**

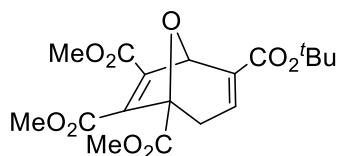

8-oxatropane **8b** (104 mg, 273  $\mu\text{mol}$ , 1.0 equiv) was dissolved in  $\text{CH}_2\text{Cl}_2$  (0.4 mL). Then TEA (36.5 mg, 50  $\mu\text{L}$ , 361  $\mu\text{mol}$ , 1.3 equiv) was added and the reaction mixture was stirred for 30 min at 25  $^\circ\text{C}$ . The solvent was removed under reduced pressure and product **12** (104 mg, 273  $\mu\text{mol}$ , quant.) was obtained as a yellowish oil.

$R_f$  = 0.32 (PE:EA = 3:1; UV,  $\text{KMnO}_4$ );  $^1\text{H NMR}$  (400 MHz,  $\text{CDCl}_3$ )  $\delta$  = 6.70 (ddd,  $J$  = 4.0, 3.3, 0.8 Hz, 1H), 5.51 (t,  $J$  = 1.0 Hz, 1H), 3.79 (s, 3H), 3.77 (s, 3H), 3.74 (s, 3H), 3.04 (ddd,  $J$  = 20.0, 3.3, 1.4 Hz, 1H), 2.50 (dd,  $J$  = 20.1, 4.0 Hz, 1H), 1.44 (s, 9H);  $^{13}\text{C NMR}$  (101 MHz,  $\text{CDCl}_3$ )  $\delta$  = 168.1 (q), 162.6 (q), 162.3 (q), 162.0 (q), 147.9 (q), 135.9 (+), 135.6 (q), 134.4 (q), 86.6 (q), 81.4 (q), 78.3 (+), 53.2 (+), 52.62 (+), 52.59 (+), 28.6 (–), 28.0 (+);  $\text{IR } \tilde{\nu}$  [ $\text{cm}^{-1}$ ]: 2982, 2956, 1722, 1640, 1439, 1368, 1252, 1152, 1092, 1010, 943, 876, 846, 753;  $\text{HRMS}$  (ESI): calcd. for  $\text{C}_{18}\text{H}_{22}\text{O}_9$  ( $\text{M}+\text{NH}_4$ ) $^+$ ,  $m/z$  = 400.1602; found 400.1600.

**8-(*Tert*-butyl) 2-ethyl 6,7-dimethyl (1*S*,5*R*)-8-azabicyclo[3.2.1]octa-2,6-diene-2,6,7,8-tetracarboxylate (13)**

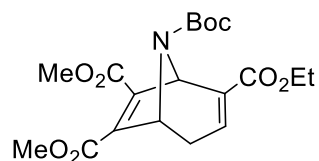

8-azatropane **7c** (283 mg, 716  $\mu\text{mol}$ , 1.0 equiv) was dissolved in  $\text{CH}_2\text{Cl}_2$  (2 mL). Then TEA (94.2 mg, 130  $\mu\text{L}$ , 930  $\mu\text{mol}$ , 1.3 equiv) was added and the reaction mixture was stirred for 2 h at 25  $^\circ\text{C}$ . The solvent was removed under reduced pressure and product **13** (280 mg, 709  $\mu\text{mol}$ , 99%) was obtained as a yellowish oil.

$R_f$  = 0.62 (PE:EA = 2:1;  $\text{KMnO}_4$ );  $^1\text{H NMR}$  (400 MHz,  $\text{CDCl}_3$ ):  $\delta$  = 6.70 – 6.61 (m, 1H), 5.40 – 5.25 (m, 1H), 4.93 (d,  $J$  = 5.5 Hz, 1H), 4.23 – 4.13 (m, 2H), 3.76 (s, 3H), 3.75 (s, 3H), 3.01 – 2.72 (m, 1H), 2.23 (dd,  $J$  = 20.3, 3.8 Hz, 1H), 1.40 (s, 9H), 1.25 (t,  $J$  = 7.1 Hz, 3H) (signal broadening due to rotamers);  $^{13}\text{C NMR}$  (101 MHz,  $\text{CDCl}_3$ )  $\delta$  = 163.8 (q), 162.9 (q), 162.6 (q), 152.8 (q), 147.8 (q), 137.1 (+), 135.6 (q), 134.8 (q), 81.0 (q), 60.8 (–), 58.6 (+), 57.9 (+), 52.43 (+), 52.36 (+), 28.2 (+), 25.9 (–), 14.2 (+) (signal broadening due to rotamers);  $\text{IR } \tilde{\nu}$  [ $\text{cm}^{-1}$ ]: 2960, 1707, 1640, 1439, 1368, 1252, 1118, 1156, 1080, 1029, 943, 857, 783;  $\text{HRMS}$  (ESI): calcd. for  $\text{C}_{19}\text{H}_{25}\text{NO}_8$  ( $\text{M}+\text{Na}$ ) $^+$ ,  $m/z$  = 418.1472; found 418.1475.

**9-(*Tert*-butyl) 5-ethyl 7,8-dimethyl (1*S*,2*S*,4*R*,5*R*,6*S*)-3-oxa-9-azatricyclo[4.2.1.0 $^{2,4}$ ]non-7-ene-5,7,8,9-tetracarboxylate (14)**

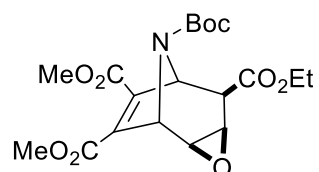

Cycloadduct **7c** (327 mg, 826  $\mu\text{mol}$ , 1.0 equiv) was dissolved in  $\text{CH}_2\text{Cl}_2$  (15 mL). Then *m*-CPBA (285 mg, 1.65 mmol, 2.0 equiv) was added at 25  $^\circ\text{C}$ . After stirring for 1 d, additional *m*-CPBA (285 mg, 1.65 mmol, 2.0 equiv) was added and the reaction was stirred for further 2 d at 25  $^\circ\text{C}$ . The reaction was quenched with saturated aqueous sodium thiosulfate. Then the aqueous layer was extracted with  $\text{CH}_2\text{Cl}_2$  (3 x 20 mL). The combined organic phases were washed with saturated aqueous  $\text{NaHCO}_3$  (3 x 30 mL), brine (2 x 30 mL) and were dried over

Na<sub>2</sub>SO<sub>4</sub>. The solvent was removed under reduced pressure and epoxide **14** (336 mg, 816 μmol, 99%) was obtained as a colorless solid.

**R<sub>f</sub>** = 0.39 (PE:EA = 3:2; UV, KMnO<sub>4</sub>); **m.p.** = 122 °C; **<sup>1</sup>H NMR** (300 MHz, CDCl<sub>3</sub>): δ = 5.40 – 5.28 (m, 1H), 5.23 – 4.89 (m, 1H), 4.40 – 4.16 (m, 2H), 3.85 (s, 3H), 3.83 (s, 3H), 3.52 – 3.34 (m, 1H), 3.35 – 3.24 (m, 1H), 2.77 (d, *J* = 4.5 Hz, 1H), 1.43 (s, 9H), 1.32 (t, *J* = 7.1 Hz, 3H) (signal broadening and doubling due to rotamers); **<sup>13</sup>C NMR** (101 MHz, CDCl<sub>3</sub>): δ = 168.9 (q), 168.8 (q), 163.0 (q), 162.4 (q), 152.6 (q), 152.1 (q), 142.2 (q), 142.1 (q), 141.7 (q), 140.6 (q), 80.8 (q), 61.5 (–), 59.8 (+), 59.7 (+), 58.8 (+), 58.0 (+), 52.7 (+), 49.2 (+), 46.9 (+), 38.8 (+), 38.0 (+), 28.1 (+), 14.1 (+) (signal broadening and doubling due to rotamers); **IR**  $\tilde{\nu}$  [cm<sup>-1</sup>]: 2989, 2956, 2904, 1730, 1696, 1651, 1416, 1349, 1267, 1223, 1197, 1118, 1036, 954, 891, 764, 727, 686; **HRMS** (ESI): calcd. for C<sub>19</sub>H<sub>25</sub>NO<sub>9</sub> (M+H)<sup>+</sup>, *m/z* = 412.1602; found 412.1610.

**8-(*Tert*-butyl) 2-ethyl 6,7-dimethyl (1*S*,4*R*,5*S*)-4-hydroxy-8-azabicyclo[3.2.1]octa-2,6-diene-2,6,7,8-tetracarboxylate (**15**)**

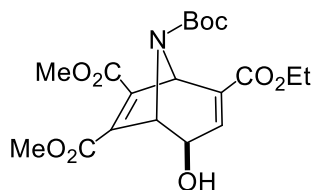

Flash column chromatography (25% EA:PE + 1% TEA) of epoxide **14** (336 mg, 816 μmol, 1.0 equiv) resulted in allylic alcohol **15** (259 mg, 630 μmol, 77%) as a colorless oil.

**R<sub>f</sub>** = 0.41 (PE:EA = 3:2; UV, KMnO<sub>4</sub>); **<sup>1</sup>H NMR** (300 MHz, CDCl<sub>3</sub>): δ = 6.71 – 6.60 (m, 1H), 5.56 – 5.33 (m, 1H), 5.13 – 5.04 (m, 1H), 4.40 – 4.15 (m, 3H), 3.81 (s, 3H), 3.80 (s, 3H), 1.44 (s, 9H), 1.31 (t, *J* = 7.1 Hz, 3H) (signal broadening due to rotamers); **<sup>13</sup>C NMR** (101 MHz, CDCl<sub>3</sub>): δ = 163.7 (q), 162.6 (q), 162.3 (q), 155.5 (q), 150.0 (q), 137.7 (+), 137.1 (q), 135.8 (q), 82.3 (q), 65.2 (+), 64.9 (+), 61.3 (–), 59.8 (+), 52.58 (+), 52.56 (+), 28.2 (+), 14.2 (+) (signal broadening due to rotamers); **IR**  $\tilde{\nu}$  [cm<sup>-1</sup>]: 3440, 2982, 1711, 1435, 1394, 1372, 1323, 1252, 1163, 1118, 1088, 1040, 951, 921, 775; **HRMS** (ESI): calcd. for C<sub>19</sub>H<sub>25</sub>NO<sub>9</sub> (M+H)<sup>+</sup>, *m/z* = 412.1602; found 412.1600.

**8-(*Tert*-butyl) 2-ethyl 6,7-dimethyl (1*S*,2*R*,3*S*,4*S*,5*S*)-3-(benzyloxy)-4-bromo-8-azabicyclo[3.2.1]oct-6-ene-2,6,7,8-tetracarboxylate (16)**

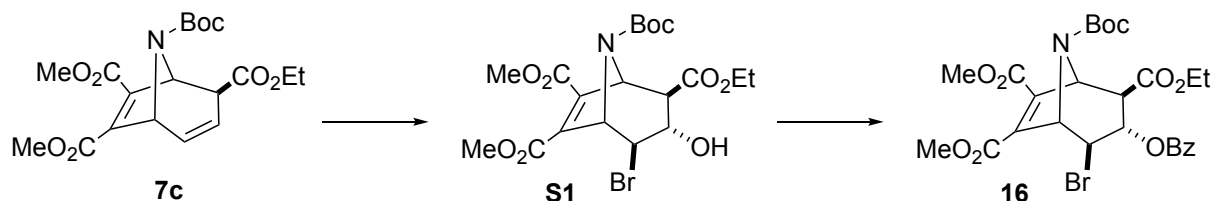

To a stirred solution of cycloadduct **7c** (641 mg, 1.62 mmol, 1.0 equiv) in acetone:H<sub>2</sub>O (3 mL; 3:1 v/v) NBS (577 mg, 3.24 mmol, 2.0 equiv) was added in portions within 45 min at 0 °C under exclusion of light. The reaction mixture was allowed to warm up to 25 °C and stirred for 21 h at 25 °C. The reaction was quenched with saturated aqueous sodium metabisulfite until the initial yellow color had faded. Acetone was removed under reduced pressure. Then the residue was redissolved in diethyl ether and the aqueous phase was extracted with diethyl ether (3 x 20 mL). The combined organic phases were washed with H<sub>2</sub>O (2 x 30 mL), brine (2 x 30 mL) and dried over Na<sub>2</sub>SO<sub>4</sub>. Removal of the solvent under reduced pressure afforded halohydrin **S1** (confirmed by X-ray analysis, *vide infra*) as a colorless oil. To a solution of halohydrin in CH<sub>2</sub>Cl<sub>2</sub> (9 mL) benzoyl chloride (342 mg, 280 μL, 2.43 mmol, 1.5 equiv), TEA (820 mg, 1.12 mL, 8.10 mmol, 5.0 equiv) and DMAP (89.1 mg, 729 μmol, 0.5 equiv) were added. After stirring for 8 h at 25 °C, the reaction mixture was diluted with CH<sub>2</sub>Cl<sub>2</sub> (5 mL). The reaction mixture was washed with saturated aqueous NaHCO<sub>3</sub> (5 x 10 mL) and brine (10 mL). The combined organic phases were dried over Na<sub>2</sub>SO<sub>4</sub> and the solvent was removed under reduced pressure. Purification of the crude product by flash system (10 → 15% EA:PE) yielded compound **16** (571 mg, 957 μmol, 59%) as a colorless oil.

$R_f$  = 0.35 (PE:EA = 3:1; UV, KMnO<sub>4</sub>); <sup>1</sup>H NMR (400 MHz, CDCl<sub>3</sub>): δ = 7.94 – 7.81 (m, 2H), 7.61 – 7.49 (m, 1H), 7.43 – 7.37 (m, 2H), 6.13 – 6.01 (m, 1H), 5.77 – 5.45 (m, 1H), 5.45 – 5.04 (m, 1H), 4.45 – 4.35 (m, 1H), 4.33 – 4.13 (m, 2H), 3.73 (s, 3H), 3.64 (s, 3H), 3.23 – 3.03 (m, 1H), 1.47 (s, 9H), 1.33 (t,  $J$  = 7.0 Hz, 3H) (signal broadening due to rotamers); <sup>13</sup>C NMR (101 MHz, CDCl<sub>3</sub>): δ = 168.3 (q), 164.5 (q), 162.8 (q), 162.5 (q), 152.8 (q), 143.4 (q), 140.6 (q), 133.5 (+), 129.7 (+), 129.0 (q), 128.4 (+), 81.5 (q), 73.3 (+), 65.3 (+), 62.0 (–), 60.0 (+), 52.54 (+), 52.50 (+), 45.2 (+), 43.2 (+), 28.2 (+), 14.2 (+) (signal broadening due to rotamers); IR  $\tilde{\nu}$  [cm<sup>-1</sup>]: 2982, 1711, 1651, 1439, 1368, 1323, 1241, 1159, 1085, 1025, 992, 947, 857, 767, 712; HRMS (ESI): calcd. for C<sub>26</sub>H<sub>30</sub>BrNO<sub>10</sub> (M+H)<sup>+</sup>,  $m/z$  = 596.1126; found 596.1129.

**2-Ethyl 6,7-dimethyl (1S,2R,3S,4S,5S)-3-(benzyloxy)-4-bromo-8-methyl-8-azabicyclo[3.2.1]oct-6-ene-2,6,7-tricarboxylate (17)**

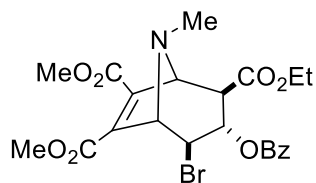

Cycloadduct **16** (229 mg, 384  $\mu\text{mol}$ , 1.0 equiv) was dissolved in  $\text{CH}_2\text{Cl}_2$  (4 mL) and TFA (1.44 g, 970  $\mu\text{L}$ , 12.7 mmol, 33 equiv) was added dropwise at 25  $^\circ\text{C}$ . After stirring for 1.5 h at 25  $^\circ\text{C}$ , the reaction mixture was diluted with  $\text{CH}_2\text{Cl}_2$  (5 mL) and saturated aqueous  $\text{NaHCO}_3$  was added dropwise. The phases were separated, and the aqueous layer was extracted with  $\text{CH}_2\text{Cl}_2$  (3 x 10 mL). The combined organic layers were washed with brine (25 mL) and dried over  $\text{Na}_2\text{SO}_4$ . Then the solvent was removed under reduced pressure and the crude amine was obtained as a yellowish oil. To a solution of crude amine and formaldehyde (70.3 mg, 176  $\mu\text{L}$ , 2.34 mmol, 6.0 equiv) in MeCN (5 mL) was added  $\text{NaBH}_3\text{CN}$  (71.4 mg, 1.14 mmol, 3.0 equiv) and the reaction mixture was stirred for 1 h at 25  $^\circ\text{C}$ . The solution was acidified to pH 6 with HOAc and stirred for 1.5 h. After neutralization to pH 9 with  $\text{NH}_3$  (25%), the mixture was diluted with  $\text{CH}_2\text{Cl}_2$  (10 mL) and saturated aqueous  $\text{NaHCO}_3$  (10 mL). The phases were separated, and the aqueous layer was extracted with  $\text{CH}_2\text{Cl}_2$  (5 x 10 mL). The combined organic layers were washed with brine (30 mL) and dried over  $\text{Na}_2\text{SO}_4$ . After removal of the solvent under reduced pressure, the crude product was purified by flash system (18  $\rightarrow$  39% EA:PE) to afford cycloadduct **17** (98.9 mg, 194  $\mu\text{mol}$ , 50%) as a colorless oil.

$R_f$  = 0.74 (PE:EA = 1:1; UV,  $\text{KMnO}_4$ );  $^1\text{H NMR}$  (300 MHz,  $\text{CDCl}_3$ ):  $\delta$  = 7.97 – 7.84 (m, 2H), 7.60 – 7.48 (m, 1H), 7.45 – 7.33 (m, 2H), 6.09 (t,  $J$  = 0.9 Hz, 1H), 4.43 – 4.24 (m, 4H), 3.96 (dt,  $J$  = 2.3, 0.8 Hz, 1H), 3.71 (s, 3H), 3.64 (s, 3H), 3.04 (dd,  $J$  = 2.3, 1.1 Hz, 1H), 2.43 (s, 3H), 1.33 (t,  $J$  = 7.1 Hz, 3H);  $^{13}\text{C NMR}$  (101 MHz,  $\text{CDCl}_3$ ):  $\delta$  = 169.2 (q), 164.7 (q), 164.2 (q), 163.9 (q), 141.0 (q), 139.9 (q), 133.3 (+), 129.8 (+), 129.3 (q), 128.3 (+), 74.6 (+), 72.8 (+), 69.6 (+), 61.8 (–), 52.3 (+), 46.1 (+), 44.6 (+), 41.8 (+), 14.2 (+);  $\text{IR } \tilde{\nu}$  [ $\text{cm}^{-1}$ ]: 2952, 1715, 1648, 1435, 1372, 1320, 1245, 1088, 1025, 943, 790, 865, 790, 708;  $\text{HRMS}$  (ESI): calcd. for  $\text{C}_{22}\text{H}_{24}\text{BrNO}_8$  ( $\text{M}+\text{H}$ ) $^+$ ,  $m/z$  = 510.0758; found 510.0762.

**8-(*Tert*-butyl) 2-ethyl 6,7-dimethyl (1*S*,2*S*,5*R*,6*R*,7*S*)-6,7-dihydroxy-8-azabicyclo[3.2.1]oct-3-ene-2,6,7,8-tetracarboxylate (18)**

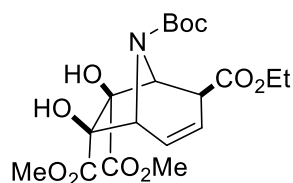

To a solution of cycloadduct **7c** (121 mg, 306  $\mu\text{mol}$ , 1.0 equiv) in acetone (1.5 mL) and  $\text{H}_2\text{O}$  (1.2 mL) was added NMO (82.7 mg, 612  $\mu\text{mol}$ , 2.0 equiv) followed by  $\text{K}_2\text{OsO}_4 \cdot 2\text{H}_2\text{O}$  (6 mg, 15  $\mu\text{mol}$ , 5 mol%) at 0  $^\circ\text{C}$ . The reaction mixture was stirred for 12 h at 0  $^\circ\text{C}$ . Then the reaction mixture was filtered through a short plug of silica and the solvent was removed under reduced pressure. Recrystallization from diethyl ether yielded diol **18** (57.0 mg, 137  $\mu\text{mol}$ , 43%) as a colorless solid.

$R_f$  = 0.55 (PE:EA = 1:2; Seebach's stain,  $\text{KMnO}_4$ ); **m.p.** = 131  $^\circ\text{C}$ ;  $^1\text{H NMR}$  (400 MHz,  $\text{CDCl}_3$ ):  $\delta$  = 6.30 – 6.19 (m, 1H), 5.85 – 5.73 (m, 1H), 5.16 – 4.99 (m, 1H), 4.97 – 4.84 (m, 1H), 4.77 – 4.54 (m, 2H), 4.22 – 4.09 (m, 2H), 3.76 (s, 3H), 3.67 (s, 3H), 3.15 – 2.93 (m, 1H), 1.43 (s, 9H), 1.28 – 1.22 (m, 3H) (signal broadening and doubling due to rotamers);  $^{13}\text{C NMR}$  (101 MHz,  $\text{CDCl}_3$ ):  $\delta$  = 170.9 (q), 170.8 (q), 170.3 (q), 169.7 (q), 169.4 (q), 154.3 (q), 128.6 (+), 128.5 (+), 124.5 (+), 124.4 (+), 89.1 (q), 88.4 (q), 85.6 (q), 84.8 (q), 81.0 (q), 80.9 (q), 67.2 (+), 65.7 (+), 62.1 (+), 61.6 (–), 61.4 (–), 60.7 (+), 53.3 (+), 53.2 (+), 52.4 (+), 52.3 (+), 45.2 (+), 45.0 (+), 28.1 (+), 14.2 (+), 14.1 (+) (signal doubling due to rotamers); **IR**  $\tilde{\nu}$  [ $\text{cm}^{-1}$ ]: 3295, 2978, 1744, 1670, 1413, 1368, 1334, 1279, 1163, 1126, 1059, 1025, 962, 921, 861, 701, 675; **HRMS** (ESI): calcd. for  $\text{C}_{19}\text{H}_{27}\text{NO}_{10}$  ( $\text{M}+\text{H}$ ) $^+$ ,  $m/z$  = 430.1708; found 430.1713.

**Triethyl (1*S*,2*R*,3*R*,4*S*,5*S*)-3,4-dihydroxy-8-tosyl-8-azabicyclo[3.2.1]oct-6-ene-2,6,7-tricarboxylate (19)**

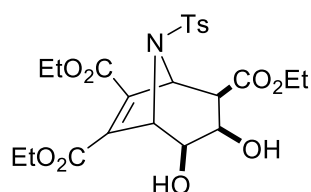

According to literature procedure<sup>[11]</sup>, to a vigorously stirred solution of the cycloaddition product **7f** (137 mg, 287  $\mu\text{mol}$ , 1.0 equiv) in MeCN (1.7 mL) was added a solution of  $\text{RuCl}_3 \cdot 3\text{H}_2\text{O}$  (4 mg, 17.7  $\mu\text{mol}$ , 6 mol%) and  $\text{NaIO}_4$  (95.0 mg, 444  $\mu\text{mol}$ , 1.6 equiv) in  $\text{H}_2\text{O}$  (0.3 mL) at 0  $^\circ\text{C}$ . The mixture was allowed to warm to 25  $^\circ\text{C}$  and stirred for 2 d. Then the suspension was filtered

through a short plug of silica gel, which was washed with EA. Concentration of the filtrate and purification by flash column chromatography (33% EA:PE) yielded diol **19** (69.0 mg, 135  $\mu\text{mol}$ , 47%) as a colorless oil.

$R_f = 0.25$  (PE:EA = 2:1; UV);  $^1\text{H NMR}$  (300 MHz,  $\text{CDCl}_3$ ):  $\delta = 7.66 - 7.57$  (m, 2H), 7.29 – 7.22 (m, 2H, overlapping with solvent signal), 5.03 (dd,  $J = 2.6, 1.1$  Hz, 1H), 4.86 (s, 1H), 4.32 – 4.11 (m, 6H), 3.98 (bs, 1H), 3.85 (bs, 1H), 3.32 (dd,  $J = 6.3, 2.6$  Hz, 1H), 2.39 (s, 3H), 1.36 (t,  $J = 7.1$  Hz, 3H), 1.26 – 1.20 (m, 6H);  $^{13}\text{C NMR}$  (75 MHz,  $\text{CDCl}_3$ ):  $\delta = 172.1$  (q), 161.4 (q), 161.1 (q), 144.5 (q), 138.9 (q), 137.3 (q), 133.9 (q), 130.1 (+), 127.7 (+), 68.8 (+), 65.8 (+), 65.1 (+), 64.9 (+), 62.6 (–), 61.9 (–), 61.8 (–), 46.3 (+), 21.6 (+), 14.1 (+), 14.02 (+), 13.99 (+);  $\text{IR } \tilde{\nu} [\text{cm}^{-1}]$ : 3440, 2982, 1700, 1394, 1364, 1256, 1163, 1025, 931, 880, 723;  $\text{HRMS}$  (ESI): calcd. for  $\text{C}_{23}\text{H}_{29}\text{NO}_{10}$  ( $\text{M}+\text{Na}$ ) $^+$ ,  $m/z = 534.1404$ ; found 534.1400.

**8-(*Tert*-butyl) 2,6,7-trimethyl (1*S*,2*R*,3*S*,4*S*,5*S*)-3-(benzyloxy)-4-bromo-8-azabicyclo[3.2.1]oct-6-ene-2,6,7,8-tetracarboxylate (20)**

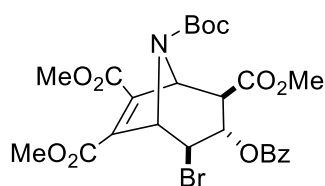

To a stirred solution of cycloadduct **7d** (620 mg, 1.63 mmol, 1.0 equiv) in acetone:H<sub>2</sub>O (8 mL; 4:1 v/v) NBS (1.16 g, 6.52 mmol, 4.0 equiv) was added in portions within 45 min at 0 °C under exclusion of light. Subsequently, the ice bath was removed, and the reaction mixture was stirred for 3 d at 25 °C. The reaction was quenched with saturated aqueous sodium metabisulfite until the initial yellow color had faded. Acetone was removed under reduced pressure. Then the residue was redissolved in diethyl ether and the aqueous phase was extracted with diethyl ether (3 x 15 mL). The combined organic phases were washed with H<sub>2</sub>O (2 x 30 mL), brine (2 x 30 mL) and dried over Na<sub>2</sub>SO<sub>4</sub>. The solvent was removed under reduced pressure and the crude halohydrin was obtained as a colorless oil. To a solution of halohydrin in CH<sub>2</sub>Cl<sub>2</sub> (8 mL) benzoyl chloride (344 mg, 282  $\mu\text{L}$ , 2.45 mmol, 1.5 equiv), TEA (825 mg, 1.13 mL, 8.15 mmol, 5.0 equiv) and DMAP (89.6 mg, 734  $\mu\text{mol}$ , 0.5 equiv) were added. After stirring for 15 h at 25 °C, the reaction mixture was diluted with CH<sub>2</sub>Cl<sub>2</sub> (15 mL). The mixture was washed with saturated aqueous NaHCO<sub>3</sub> (5 x 20 mL) and brine (30 mL). The combined organic phases were dried over Na<sub>2</sub>SO<sub>4</sub> and the solvent was removed under



reduced pressure. Purification of the crude product by flash system (10 → 18% EA:PE) yielded compound **20** (407 mg, 700 μmol, 43%) as a colorless oil.

$R_f$  = 0.58 (PE:EA = 3:2; UV, KMnO<sub>4</sub>); **<sup>1</sup>H NMR** (300 MHz, CDCl<sub>3</sub>): δ = 7.94 – 7.83 (m, 2H), 7.60 – 7.50 (m, 1H), 7.44 – 7.35 (m, 2H), 6.17 – 6.00 (m, 1H), 5.73 – 5.51 (m, 1H), 5.38 – 5.08 (m, 1H), 4.53 – 4.25 (m, 1H), 3.83 (s, 3H), 3.73 (s, 3H), 3.66 (s, 3H), 3.22 – 3.05 (m, 1H), 1.48 (s, 9H) (signal broadening due to rotamers); **<sup>13</sup>C NMR** (75 MHz, CDCl<sub>3</sub>): δ = 168.8 (q), 164.5 (q), 162.8 (q), 162.5 (q), 152.5 (q), 147.0 (q), 141.8 (q), 133.5 (+), 129.7 (+), 129.0 (q), 128.4 (+), 81.6 (q), 73.3 (+), 64.5 (+), 60.1 (+), 52.8 (+), 52.59 (+), 52.56 (+), 45.0 (+), 43.1 (+), 28.2 (+) (signal broadening due to rotamers); **IR**  $\tilde{\nu}$  [cm<sup>-1</sup>]: 2978, 1707, 1651, 1435, 1394, 1323, 1241, 1163, 1085, 1025, 988, 857, 760, 712; **HRMS** (ESI): calcd. for C<sub>25</sub>H<sub>28</sub>BrNO<sub>10</sub> (M+H)<sup>+</sup>, m/z = 582.0969; found 582.0972.

**2-(*Tert*-butyl) 5,6,7-trimethyl (1*S*,4*R*,7*R*,8*R*)-8-(benzoyloxy)-2-azabicyclo[2.2.2]oct-5-ene-2,5,6,7-tetracarboxylate (**21**)**

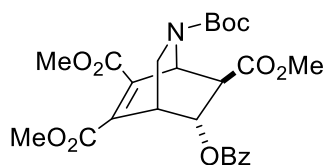

Tributyltin hydride (80.0 mg, 75 μL, 275 μmol, 1.6 equiv) and AIBN (3 mg, 19.7 μmol, 12 mol%) in dry benzene (4 mL) were added to a solution of cycloadduct **20** (98.0 mg, 168 μmol, 1.0 equiv) in dry benzene (7 mL) at reflux under N<sub>2</sub>-atmosphere. The reaction mixture was stirred for 5 h at reflux and the solvent was removed under reduced pressure. Then the residue was redissolved in EA (5 mL) and a saturated solution of KF (5 mL) was added. After stirring for 18 h at 25 °C, the white precipitate was removed by filtration. The phases were separated, and the aqueous phase was extracted with EA (3 x 10 mL). The combined organic phases were washed with brine (30 mL) and the solvent was removed under reduced pressure. The crude product was purified by flash column chromatography (flash silica gel + 10% KF, 10% → 25% EA:PE) to afford cycloadduct **21** (62.0 mg, 123 μmol, 73%) as a colorless oil.

$R_f$  = 0.35 (PE:EA = 3:1; UV, KMnO<sub>4</sub>); **<sup>1</sup>H NMR** (400 MHz, CDCl<sub>3</sub>): δ = 8.01 – 7.92 (m, 2H), 7.59 – 7.51 (m, 1H), 7.44 – 7.38 (m, 2H), 5.68 – 5.61 (m, 1H), 5.59 – 5.40 (m, 1H), 3.84 (s, 3H), 3.77 (s, 6H), 3.62 – 3.44 (m, 2H), 3.25 – 3.16 (m, 1H), 2.76 – 2.64 (m, 1H), 1.42 (s, 9H)

(signal broadening and doubling due to rotamers);  $^{13}\text{C}$  NMR (101 MHz,  $\text{CDCl}_3$ ):  $\delta$  = 170.7 (q), 170.2 (q), 165.9 (q), 165.7 (q), 163.4 (q), 163.2 (q), 154.1 (q), 153.6 (q), 141.1 (q), 140.7 (q), 136.7 (q), 136.4 (q), 133.4 (+), 129.8 (+), 129.3 (q), 128.4 (+), 80.6 (q), 71.7 (+), 71.4 (+), 52.73 (+), 52.65 (+), 52.52 (+), 52.48 (+), 49.9 (+), 48.7 (+), 42.6 (–), 42.2 (–), 38.6 (+), 38.3 (+), 28.3 (+) (signal broadening and doubling due to rotamers); IR  $\tilde{\nu}$  [ $\text{cm}^{-1}$ ]: 2956, 1722, 1651, 1439, 1394, 1267, 1174, 1111, 1029, 865, 757, 716; HRMS (ESI): calcd. for  $\text{C}_{25}\text{H}_{29}\text{NO}_{10}$  ( $\text{M}+\text{Na}$ ) $^+$ ,  $m/z$  = 526.1684; found 526.1686.

**Trimethyl (1*S*,4*R*,7*R*,8*R*)-8-(benzyloxy)-2-methyl-2-azabicyclo[2.2.2]oct-5-ene-5,6,7-tricarboxylate (22)**

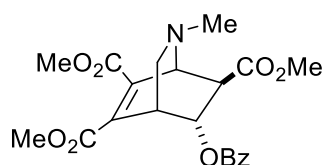

Cycloadduct **21** (59.0 mg, 117  $\mu\text{mol}$ , 1.0 equiv) was dissolved in  $\text{CH}_2\text{Cl}_2$  (4 mL) and TFA (441 mg, 296  $\mu\text{L}$ , 3.87 mmol, 33 equiv) was added dropwise at 25  $^\circ\text{C}$ . After stirring for 1 h at 25  $^\circ\text{C}$ , the reaction mixture was diluted with  $\text{CH}_2\text{Cl}_2$  (5 mL) and saturated aqueous  $\text{NaHCO}_3$  was added dropwise. The phases were separated, and the aqueous layer was extracted with  $\text{CH}_2\text{Cl}_2$  (3 x 10 mL). The combined organic layers were washed with brine (30 mL) and dried over  $\text{Na}_2\text{SO}_4$ . Then the solvent was removed under reduced pressure and the crude amine was obtained as colorless oil. To a solution of crude amine and formaldehyde (39.6 mg, 99  $\mu\text{L}$ , 1.32 mmol, 11 equiv) in MeCN (5 mL)  $\text{NaBH}_3\text{CN}$  (60.0 mg, 955  $\mu\text{mol}$ , 8.2 equiv) was added and the reaction mixture was stirred for 1 h at 25  $^\circ\text{C}$ . The solution was acidified to pH 6 with HOAc and stirred for 1.5 h at 25  $^\circ\text{C}$ . After neutralization to pH 9 with  $\text{NH}_3$  (25%), the mixture was diluted with  $\text{CH}_2\text{Cl}_2$  (10 mL) and saturated aqueous  $\text{NaHCO}_3$  (10 mL). The phases were separated, and the aqueous layer was extracted with  $\text{CH}_2\text{Cl}_2$  (5 x 10 mL). The combined organic layers were washed with brine (30 mL) and dried over  $\text{Na}_2\text{SO}_4$ . After removal of the solvent under reduced pressure, the crude product was purified by flash column chromatography (40% EA:PE + 1% TEA) to afford cycloadduct **22** (29.6 mg, 70.9  $\mu\text{mol}$ , 61%) as a colorless oil.

$R_f$  = 0.48 (PE:EA 1:1; UV,  $\text{KMnO}_4$ );  $^1\text{H}$  NMR (400 MHz,  $\text{CDCl}_3$ ):  $\delta$  = 7.98 – 7.91 (m, 2H), 7.58 – 7.49 (m, 1H), 7.45 – 7.36 (m, 2H), 5.73 (t,  $J$  = 3.0 Hz, 1H), 4.19 (d,  $J$  = 2.9 Hz, 1H), 3.85 (s, 3H), 3.80 (s, 3H), 3.71 (s, 3H), 3.49 (q,  $J$  = 2.8 Hz, 1H), 3.34 (dd,  $J$  = 10.9, 2.0 Hz, 1H), 2.63

(t,  $J = 2.8$  Hz, 1H), 2.25 (s, 3H), 2.00 (dd,  $J = 10.9, 3.0$  Hz, 1H);  **$^{13}\text{C}$  NMR** (101 MHz,  $\text{CDCl}_3$ ):  $\delta = 171.0$  (q), 165.8 (q), 165.6 (q), 165.4 (q), 137.8 (q), 137.3 (q), 133.1 (+), 129.74 (q), 129.67 (+), 128.3 (+), 70.8 (+), 58.6 (+), 52.6 (+), 52.52 (+), 52.50 (+), 52.3 (+), 50.8 (-), 44.8 (+), 37.7 (+); **IR**  $\tilde{\nu}$  [ $\text{cm}^{-1}$ ]: 3004, 2952, 2855, 2803, 1718, 1644, 1435, 1260, 1200, 1144, 1111, 1074, 958, 887, 861, 753, 716; **HRMS** (ESI): calcd. for  $\text{C}_{21}\text{H}_{23}\text{NO}_8$  ( $\text{M}+\text{H}$ )<sup>+</sup>,  $m/z = 418.1496$ ; found 418.1499.

## Derivatizations of the dimethyl maleate moiety in **7a**

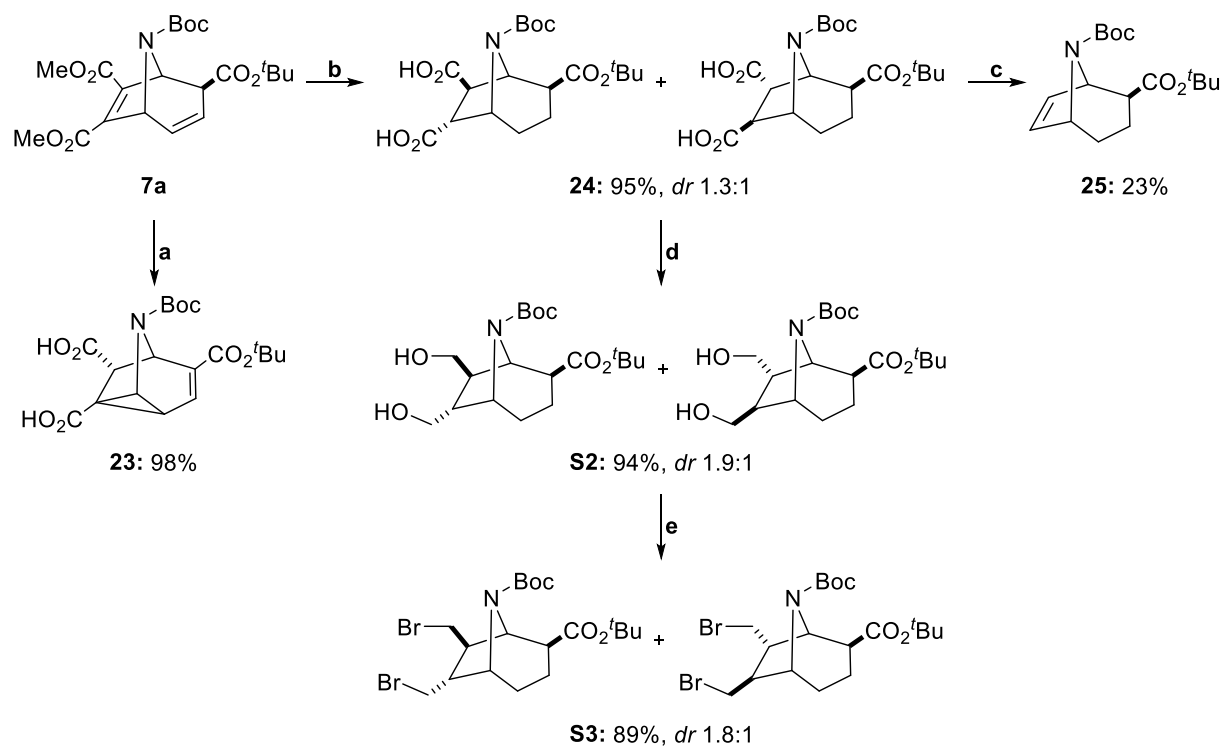

**Scheme 1.** Derivatizations of **7a**. Conditions: a) NaOH (2.0 equiv), THF, 0 to 25 °C, 5.5 h, then HCl, 0 °C, 98%; b) (i) H<sub>2</sub>, Pd/C (10 mol%), EtOH/THF (1:4 v/v), 60 bar, 25 °C, 4 h, (ii) NaOH (2.0 equiv), THF, 0 to 25 °C, 4 h, then HCl, 0 °C, 95%; c) Pb(OAc)<sub>4</sub> (2.4 equiv), C<sub>5</sub>H<sub>5</sub>N, 67 °C, 6 h, 23%; d) BH<sub>3</sub>·THF (6.5 equiv), THF, 0 to 25 °C, 24 h, 94%; e) (i) MsCl (2.2 equiv), TEA (4.0 equiv), CH<sub>2</sub>Cl<sub>2</sub>, 0 °C, 2 h, (ii) LiBr (13 equiv), THF, reflux, 9 h, 89%.

### (5*R*,7*R*, 8*S*)-4,6-Bis(*tert*-butoxycarbonyl)-6-azatricyclo[3.2.1.0<sup>2,7</sup>]oct-3-ene-1,8-dicarboxylic acid (**23**)

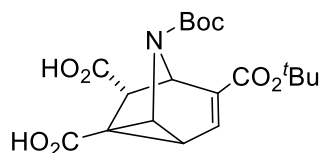

1M NaOH (510  $\mu$ L, 20.4 mg, 510  $\mu$ mol, 2.0 equiv) was added dropwise to a solution of cycloadduct **7a** (108 mg, 255  $\mu$ mol, 1.0 equiv) in THF (2 mL) at 0 °C. Subsequently, the cooling bath was removed and the mixture was stirred for 5.5 h at 25 °C. Then the solvent was removed under reduced pressure and the salt was redissolved in EA and water. The aqueous

layer was extracted with EA (3 x 15 mL). Afterwards the pH of the aqueous layer was adjusted to pH 2 by addition of 1M HCl solution. Then the aqueous layer was extracted with EA (3 x 15 mL) and the combined organic phases were washed with brine (40 mL) and dried over Na<sub>2</sub>SO<sub>4</sub>. Removal of the solvent under reduced pressure yielded cycloadduct **23** (99.0 mg, 250 μmol, 98%) as a colorless solid.

**R<sub>f</sub>** = 0.40 (PE:EA = 1:2; bromocresol green, KMNO<sub>4</sub>); **m.p.** = 127 °C; **<sup>1</sup>H NMR** (400 MHz, CDCl<sub>3</sub>): δ = 7.16 (dd, *J* = 6.5, 2.0 Hz, 1H), 5.38 – 5.25 (m, 1H), 4.19 (d, *J* = 5.9 Hz, 1H), 3.51 – 3.48 (m, 1H), 3.03 – 2.95 (m, 1H), 1.47 (s, 9H), 1.41 (s, 9H) (signal broadening due to rotamers); **<sup>13</sup>C NMR** (101 MHz, CDCl<sub>3</sub>): δ = 175.4 (q), 173.8 (q), 162.0 (q), 153.9 (q), 134.0 (+), 129.2 (q), 81.8 (q), 81.2 (q), 52.8 (+), 43.7 (+), 42.5 (+), 31.0 (+), 28.11 (q), 28.06 (+), 24.9 (+) (signal broadening due to rotamers); **IR**  $\tilde{\nu}$  [cm<sup>-1</sup>]: 3474, 2978, 2937, 1703, 1621, 1368, 1312, 1282, 1252, 1159, 1111, 1033, 995, 921, 820, 772; **HRMS** (ESI): calcd. for C<sub>19</sub>H<sub>25</sub>NO<sub>8</sub> (M+Na)<sup>+</sup>, *m/z* = 418.1472; found 418.1475.

**(1*S*,2*S*,5*R*,6*R*,7*R*)-2,8-Bis(*tert*-butoxycarbonyl)-8-azabicyclo[3.2.1]octane-6,7-dicarboxylic acid (*major 24*)**

**(1*S*,2*S*,5*R*,6*S*,7*S*)-2,8-Bis(*tert*-butoxycarbonyl)-8-azabicyclo[3.2.1]octane-6,7-dicarboxylic acid (*minor 24*)**

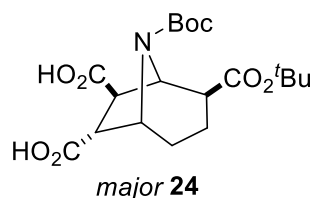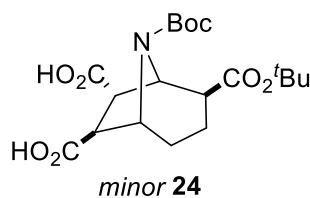

Cycloadduct **7a** (128 mg, 302 μmol, 1.0 equiv) was dissolved in EtOH:THF (3 mL; 1:4 v/v). Then Pd/C (3 mg, 30.2 μmol, 10 mol%, 10w% Pd on charcoal) was added and the reaction mixture was transferred in a vial which was placed in an autoclave and sealed. Then the autoclave was pressurized to 60 bar with H<sub>2</sub> and the solution was stirred for 4 h at 25 °C. The reaction mixture was filtered and the solvent was removed under reduced pressure. The crude product was dissolved in THF (2 mL) and a 1M NaOH (604 μL, 24.2 mg, 605 μmol, 2.0 equiv) was added dropwise at 0 °C. Subsequently, the cooling bath was removed and the mixture was stirred for 4 h at 25 °C. After removal of the solvent, the residue was redissolved in EA and water and the phases were separated. The aqueous layer was extracted with EA (3 x 15 mL). Afterwards the pH of the aqueous layer was adjusted to pH 2 by addition of 1M HCl solution. Then the aqueous layer was extracted with EA (3 x 15 mL) and the combined

organic phases were washed with brine (30 mL) and dried over Na<sub>2</sub>SO<sub>4</sub>. Removal of the solvent under reduced pressure yielded diastereomeric mixture of compound **24** (115 mg, 287 μmol, 95%, *dr* 1.3:1) as a colorless solid.

In the proton and carbon NMR the signals of both diastereomers are overlapping. Characteristic signals of the minor diastereomer are marked.

**R<sub>f</sub>** = 0.68 (CH<sub>2</sub>Cl<sub>2</sub>:MeOH = 9:1; bromocresol green, KMNO<sub>4</sub>); **m.p.** = 173 °C; **<sup>1</sup>H NMR** (400 MHz, CDCl<sub>3</sub>): δ = 11.09 (s, 4H), 5.15 – 5.05 <sup>minor</sup> (m, 1H), 5.06 – 4.99 (m, 1.32H), 4.83 – 4.47 (m, 2.32H), 3.78 – 3.73 <sup>minor</sup> (m, 1H), 3.70 – 3.63 (m, 1.38H), 3.34 (d, *J* = 6.2 Hz, 1.34H), 3.29 <sup>minor</sup> (d, *J* = 6.1 Hz, 1H), 2.77 <sup>minor</sup> (dd, *J* = 6.0, 2.8 Hz, 1H), 2.65 (dd, *J* = 6.1, 2.9 Hz, 1.31H), 2.06 – 1.91 (m, 4.30H), 1.77 – 1.51 (m, 5.30H), 1.47 – 1.36 (m, 41.91H) (signal broadening due to rotamers); **<sup>13</sup>C NMR** (101 MHz, CDCl<sub>3</sub>): δ = 178.7 (q), 177.3 (q), 175.9 (q), 175.44 (q), 171.39 (q), 171.0 (q), 153.4 (q), 81.3 (q), 81.2 (q), 80.9 (q), 59.0 (+), 58.8 (+), 57.7 (+), 56.6 (+), 49.0 (+), 48.8 (+), 48.6 (+), 48.2 (+), 45.9 (+), 41.9 (+), 28.7 (–), 28.2 (+), 27.9 (+), 24.51 (–), 18.12 (–), 18.01 (–) (signal broadening due to rotamers); **IR**  $\tilde{\nu}$  [cm<sup>-1</sup>]: 3440, 2978, 2937, 1700, 1394, 1368, 1312, 1252, 1156, 1051, 1010, 943, 850, 757, 705; **HRMS** (ESI): calcd. for C<sub>19</sub>H<sub>29</sub>NO<sub>8</sub> (M+H)<sup>+</sup>, *m/z* = 400.1966; found 400.1969 (*major 24* *t<sub>r</sub>* = 5.763-5.829 min); **HRMS** (ESI): calcd. for C<sub>19</sub>H<sub>29</sub>NO<sub>8</sub> (M+H)<sup>+</sup>, *m/z* = 400.1966; found 400.1967 (*minor 24* *t<sub>r</sub>* = 5.829-5.908 min).

#### Di-*tert*-butyl (1*R*,2*S*,5*R*)-8-azabicyclo[3.2.1]oct-6-ene-2,8-dicarboxylate (**25**)

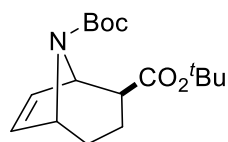

To a solution of compound **24** (99.7 mg, 227 μmol, 1.0 equiv) in dry pyridine (2.5 mL) was added Pb(OAc)<sub>4</sub> (141 mg, 318 μmol, 1.4 equiv) at 0 °C under N<sub>2</sub>-atmosphere. Then the reaction temperature was gradually raised to 67 °C. After 3 h, additional Pb(OAc)<sub>4</sub> (101 mg, 227 μmol, 1.0 equiv) was added at 0 °C and the reaction mixture was stirred for 3 h at 67 °C. At 0 °C water (5 mL) was added and the mixture was filtrated through a short plug of celite. Then the aqueous phase was extracted with diethyl ether (3 x 15 mL). The combined organic phases were washed with 5% HCl (30 mL), saturated aqueous NaHCO<sub>3</sub> (30 mL), brine (30 mL) and dried over Na<sub>2</sub>SO<sub>4</sub>. The solvent was removed under reduced pressure and the crude product was purified by flash system (2 → 7% EA:PE) to afford cycloadduct **25** (16.3 mg, 52.7 μmol, 23%) as a colorless oil.

$R_f$  = 0.70 (PE:EA = 3:1; Vanillin, KMNO<sub>4</sub>); **<sup>1</sup>H NMR** (400 MHz, DMF-*d*<sub>7</sub>, 333 K):  $\delta$  = 6.29 (dd,  $J$  = 5.9, 2.3 Hz, 1H), 6.21 (dd,  $J$  = 5.9, 2.2 Hz, 1H), 4.98 (t,  $J$  = 2.4 Hz, 1H), 4.75 – 4.58 (m, 1H), 2.41 (ddd,  $J$  = 6.3, 2.5, 1.0 Hz, 1H), 1.91 – 1.82 (m, 2H), 1.77 – 1.68 (m, 1H), 1.49 (s, 9H), 1.44 (s, 9H), 1.35 – 1.33 (m, 1H) (signal broadening due to rotamers); **<sup>13</sup>C NMR** (101 MHz, DMF-*d*<sub>7</sub>, 333 K):  $\delta$  = 172.3 (q), 153.7 (q), 133.7 (+), 132.4 (+), 80.3 (q), 79.3 (q), 61.1 (+), 59.7 (+), 40.8 (+), 28.4 (+), 28.1 (+), 22.8 (–), 18.8 (–) (signal broadening due to rotamers); **IR**  $\tilde{\nu}$  [cm<sup>-1</sup>]: 2975, 2930, 1730, 1700, 1368, 1312, 1252, 1163, 1051, 1013, 857; **HRMS** (ESI): calcd. for C<sub>17</sub>H<sub>27</sub>NO<sub>4</sub> (M+H)<sup>+</sup>,  $m/z$  = 310.2013; found 310.2015.

**Di-tert-butyl (1*R*,2*S*,5*R*,6*R*,7*R*)-6,7-bis(hydroxymethyl)-8-azabicyclo[3.2.1]octane-2,8-dicarboxylate (major S2)**

**Di-tert-butyl (1*R*,2*S*,5*R*,6*S*,7*S*)-6,7-bis(hydroxymethyl)-8-azabicyclo[3.2.1]octane-2,8-dicarboxylate (minor S2)**

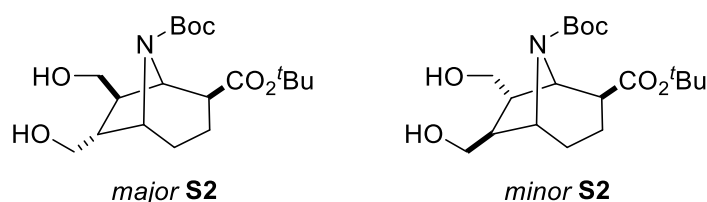

BH<sub>3</sub>·THF (1.61 mL, 139 mg, 1.61 mmol, 3.5 equiv) was added dropwise to a solution of compound **24** (184 mg, 461  $\mu$ mol, 1.0 equiv) in dry THF (4 mL) at 0 °C under N<sub>2</sub>-atmosphere. The mixture was then warmed to 25 °C and after 8 h additional BH<sub>3</sub>·THF (1.38 mL, 119 mg, 1.38 mmol, 3.0 equiv) was added at 0 °C, then the mixture was stirred for 16 h at 25 °C. Afterwards the reaction mixture was treated with MeOH and the solvent was removed under reduced pressure. The residue was redissolved in MeOH and evaporated in vacuo. This process was repeated three times and purification of the crude product by flash system (1  $\rightarrow$  8% MeOH: CH<sub>2</sub>Cl<sub>2</sub>) afforded diastereomeric mixture of compound **S2** (160 mg, 431  $\mu$ mol, 94%, *dr* 1.9:1) as a colorless oil.

In the proton and carbon NMR the signals of both diastereomers are overlapping. Characteristic signals of the minor diastereomer are marked.

$R_f$  = 0.57 (CH<sub>2</sub>Cl<sub>2</sub>:MeOH = 9:1; KMNO<sub>4</sub>); **<sup>1</sup>H NMR** (400 MHz, CDCl<sub>3</sub>):  $\delta$  = 4.68 – 4.58 <sup>minor</sup>(m, 1H), 4.45 – 4.27 (m, 2.93H), 4.23 – 4.09 (m, 2H), 3.82 – 3.61 (m, 13.62H), 3.36 – 3.20 (m, 3.81H), 2.50 – 2.41 (m, 1.94H), 2.37 – 2.29 <sup>minor</sup>(m, 1H), 2.21 – 1.85 (m, 12.66H), 1.65 – 1.51 (m, 4.35H), 1.43 – 1.36 (m, 53.88H) (signal broadening and doubling due to rotamers); **<sup>13</sup>C NMR** (101 MHz, CDCl<sub>3</sub>):  $\delta$  = 172.4 (q), 172.1 (q), 171.9 (q), 171.6 (q), 154.9 (q), 153.8 (q),

153.3 (q), 81.0 (q), 80.9 (q), 80.64 (q), 80.60 (q), 80.1 (q), 80.0 (q), 79.6 (q), 79.5 (q), 65.8 (-), 65.61 (-), 65.55 (-), 65.5 (-), 61.1 (-), 60.8 (-), 60.6 (-), 59.3 (+), 59.0 (+), 57.5 (+), 57.3 (+), 57.2 (+), 56.7 (+), 56.2 (+), 55.9 (+), 49.3 (+), 45.7 (+), 45.6 (+), 41.6 (+), 28.4 (+), 28.1 (+), 27.9 (+), 23.7 (-), 19.3 (-), 19.2 (-), 19.1 (-), 19.0 (-) (signal broadening and doubling due to rotamers); **IR**  $\tilde{\nu}$  [cm<sup>-1</sup>]: 3370, 2974, 2930, 2874, 1726, 1662, 1476, 1420, 1364, 1252, 1163, 1115, 1062, 1021, 861, 753; **HRMS** (ESI): calcd. for C<sub>19</sub>H<sub>33</sub>NO<sub>6</sub> (M+Na)<sup>+</sup>, m/z = 394.2200; found 394.2201 (*major S2* t<sub>r</sub> = 5.481-5.518 min); **HRMS** (ESI): calcd. for C<sub>19</sub>H<sub>33</sub>NO<sub>6</sub> (M+Na)<sup>+</sup>, m/z = 394.2200; found 394.2201 (*minor S2* t<sub>r</sub> = 5.576-5.659 min).

**Di-tert-butyl (1S,2S,5R,6R,7R)-6,7-bis(bromomethyl)-8-azabicyclo[3.2.1]octane-2,8-dicarboxylate (*major S3*)**

**Di-tert-butyl (1S,2S,5R,6S,7S)-6,7-bis(bromomethyl)-8-azabicyclo[3.2.1]octane-2,8-dicarboxylate (*minor S3*)**

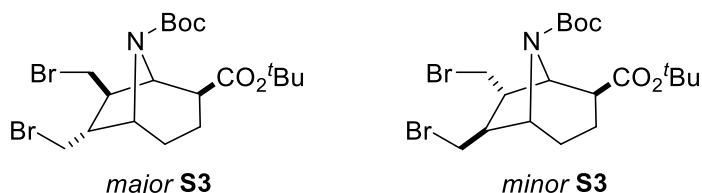

MsCl (50  $\mu$ L, 74.6 mg, 651  $\mu$ mol, 2.2 equiv) was added dropwise to a solution of TEA (165  $\mu$ L, 120 mg, 1.18 mmol, 4.0 equiv) and diol **S2** (110 mg, 296  $\mu$ mol, 1.0 equiv) in CH<sub>2</sub>Cl<sub>2</sub> (2.5 mL) at 0 °C. After stirring for 2 h at 0 °C, 1M HCl (5 mL) was added and the layers were separated. The organic layer was washed with 1M HCl (10 mL), 2M NaOH (10 mL) and brine (10 mL). The combined organic layers were dried over Na<sub>2</sub>SO<sub>4</sub> and the solvent was removed under reduced pressure to obtain the crude mesylate as yellowish solid. The mesylate was dissolved in dry THF (4 mL) and LiBr (334 mg, 3.85 mmol, 13 equiv) was added in one portion at 25 °C under N<sub>2</sub>-atmosphere. Then the reaction mixture was heated at reflux for 9 h and was concentrated in vacuo. The residue was redissolved in CH<sub>2</sub>Cl<sub>2</sub> (10 mL) and washed with water (4 x 15 mL), brine (15 mL) and dried over Na<sub>2</sub>SO<sub>4</sub>. Removal of the solvent and purification by flash system (2  $\rightarrow$  6% EA:PE) yielded diastereomeric mixture of *major* and *minor* cycloadduct **S3** (131 mg, 264  $\mu$ mol, 89%, *dr* 1.8:1) as a colorless oil.

In the proton and carbon NMR the signals of both diastereomers are overlapping. Characteristic signals of the minor diastereomer are marked.

**R<sub>f</sub>** = 0.63 (PE:EA = 5:1; UV, KMNO<sub>4</sub>); **<sup>1</sup>H NMR** (400 MHz, CDCl<sub>3</sub>):  $\delta$  = 4.84 – 4.57 (m, 2.59H), 4.51 – 4.14 (m, 3.26H), 3.76 – 3.61 (m, 2.66H), 3.52 – 3.25 (m, 9.30H), 2.58 (d, *J* = 6.0 Hz, 1H), 2.47<sup>minor</sup> (dd, *J* = 6.4, 2.7 Hz, 1.79H), 2.39 – 2.15 (m, 3.38H), 2.16 – 1.92 (m, 7.96H), 1.71 – 1.54 (m, 3.83H), 1.47 – 1.40 (m, 51.58H) (signal broadening and doubling due to rotamers);



**<sup>13</sup>C NMR** (101 MHz, CDCl<sub>3</sub>): δ = 171.8 (q), 171.3 (q), 171.2 (q), 171.0 (q), 154.4 (q), 153.6 (q), 153.2 (q), 152.9 (q), 81.1 (q), 80.8 (q), 80.3 (q), 79.7 (q), 61.5 (+), 60.4 (+), 59.7 (+), 58.3 (+), 57.4 (+), 56.9 (+), 56.2 (+), 51.5 (+), 51.0 (+), 50.8 (+), 50.2 (+), 50.1 (+), 45.3 (+), 40.3 (+), 36.7(-), 36.5 (-), 36.3 (-), 35.9 (-), 30.7 (-), 30.3 (-), 30.0 (-), 29.8 (-), 29.7 (-), 28.3 (+), 28.0 (+), 22.6 (-), 22.4 (-), 21.9 (-), 21.6 (-), 19.2 (-), 19.1 (-) (signal broadening and doubling due to rotamers); **IR** ν̄ [cm<sup>-1</sup>]: 2974, 2928, 1730, 1696, 1394, 1368, 1320, 1256, 1170, 1115, 1036, 865; **HRMS** (ESI): calcd. for C<sub>19</sub>H<sub>31</sub>Br<sub>2</sub>NO<sub>4</sub> (M+Na)<sup>+</sup>, m/z = 496.0693; found 496.0706 (*major* and *minor* **S3** t<sub>r</sub> = 7.565-7.660 min).

### 3. NMR spectra

Compound **4b**,  $^1\text{H}$  NMR and  $^{13}\text{C}$  NMR ( $\text{CDCl}_3$ ):

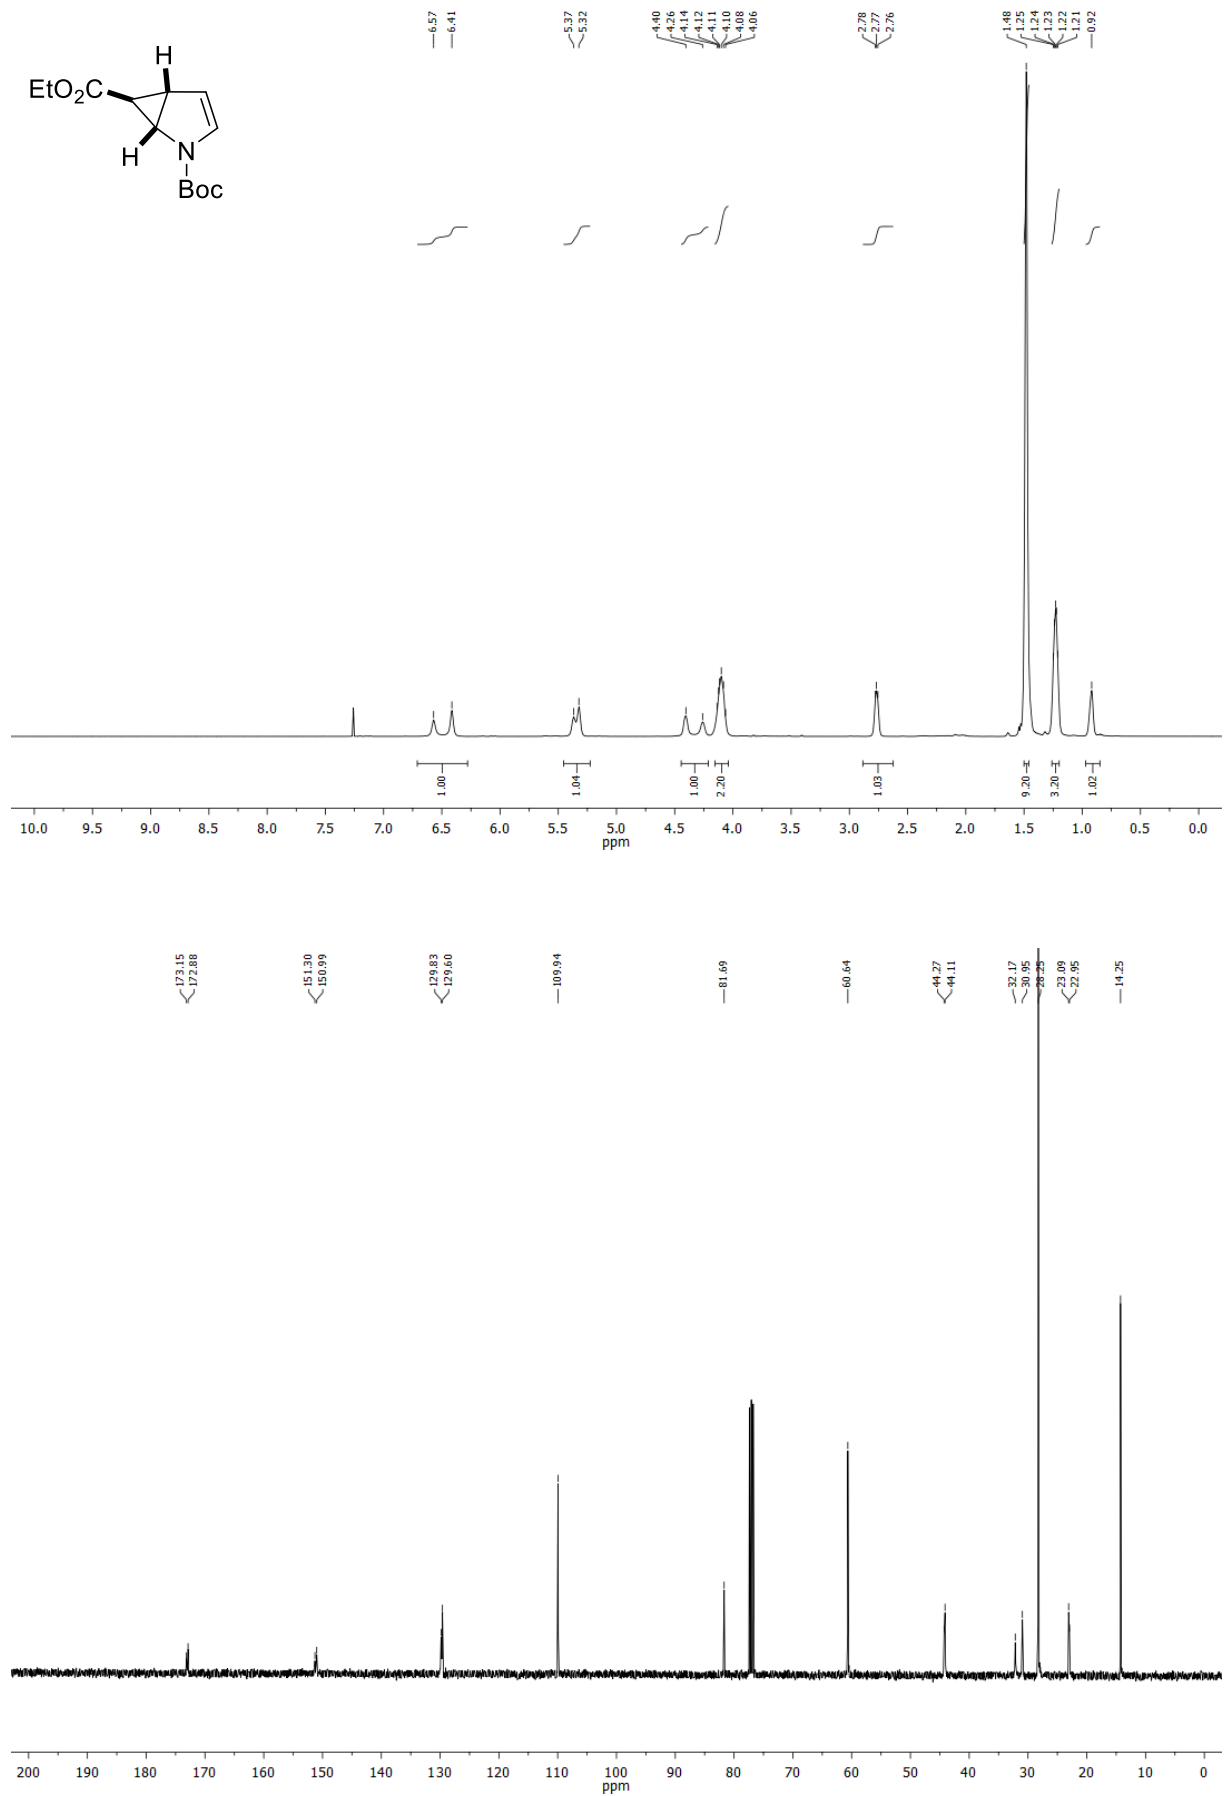

Compound **4e**,  $^1\text{H}$  NMR and  $^{13}\text{C}$  NMR ( $\text{CDCl}_3$ ):

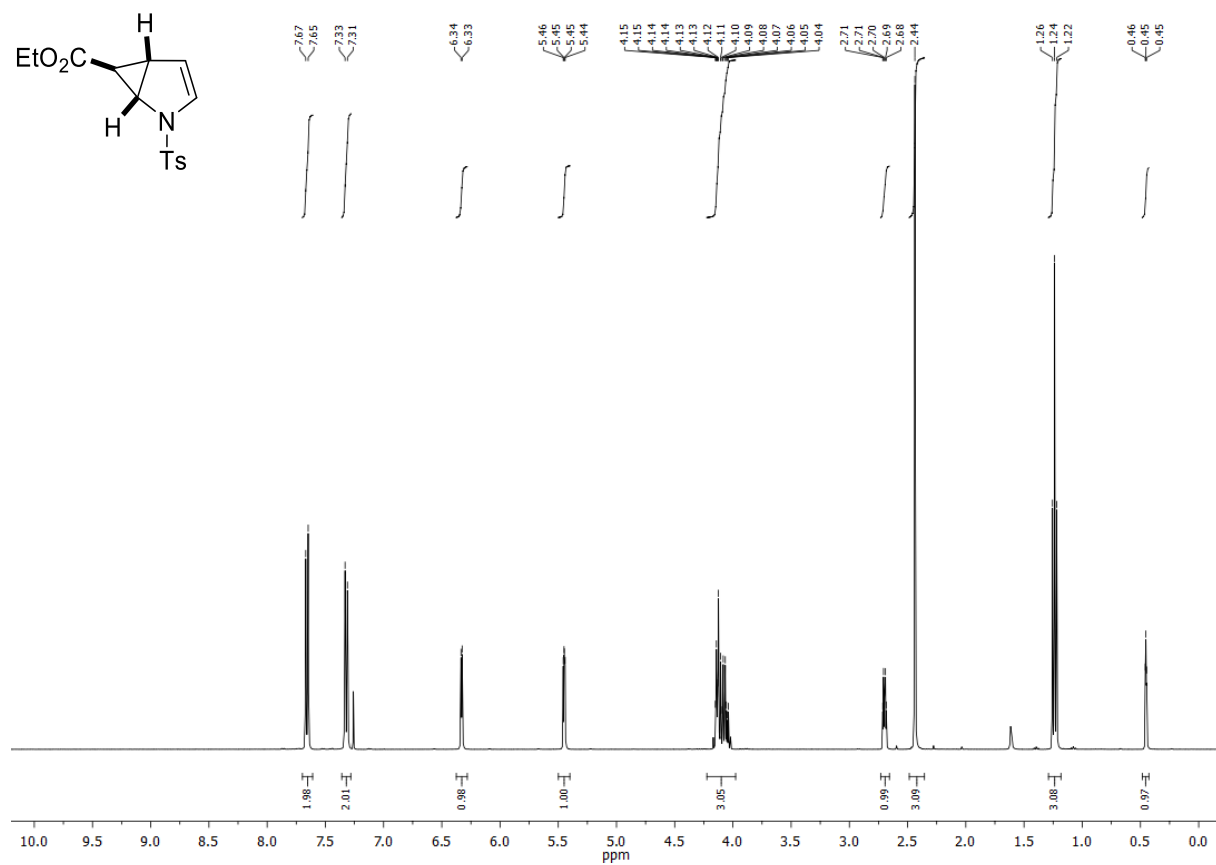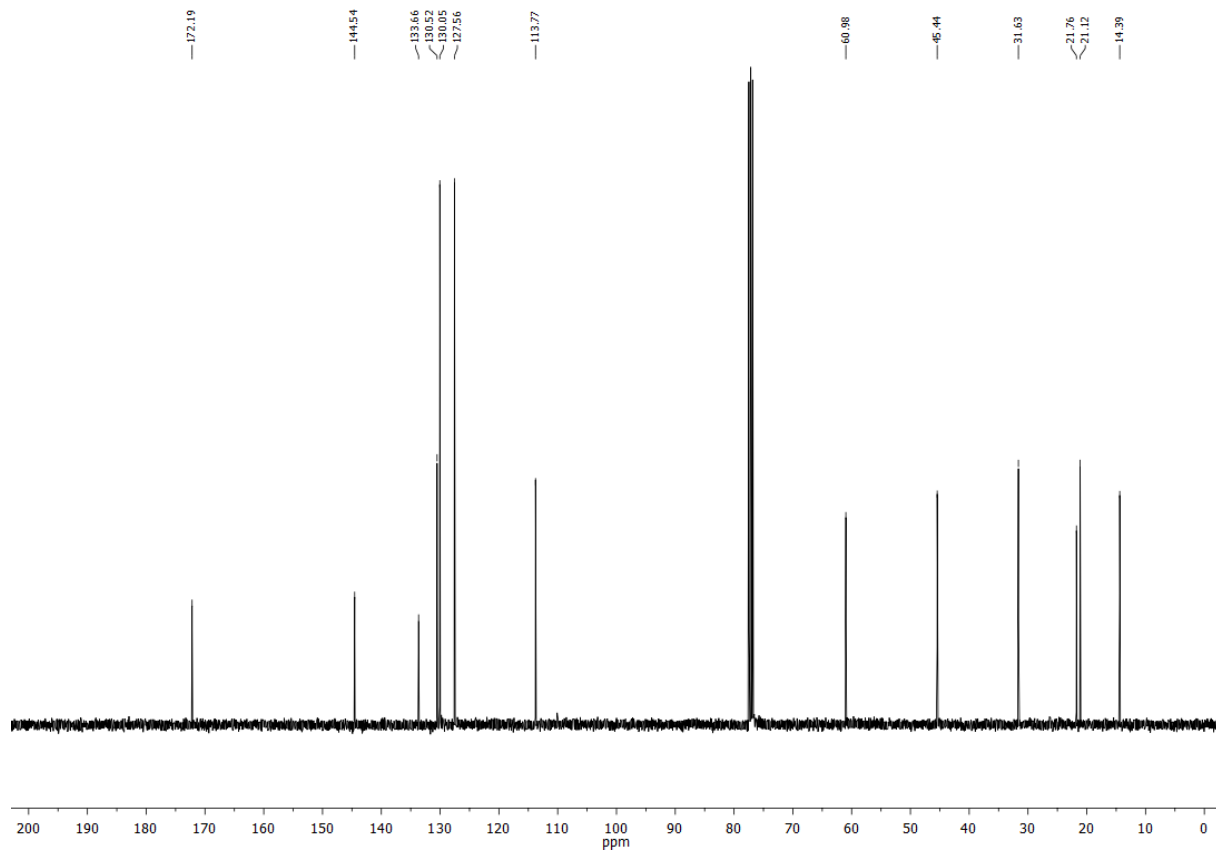

Compound (+)-7a, <sup>1</sup>H NMR and <sup>13</sup>C NMR (CDCl<sub>3</sub>):

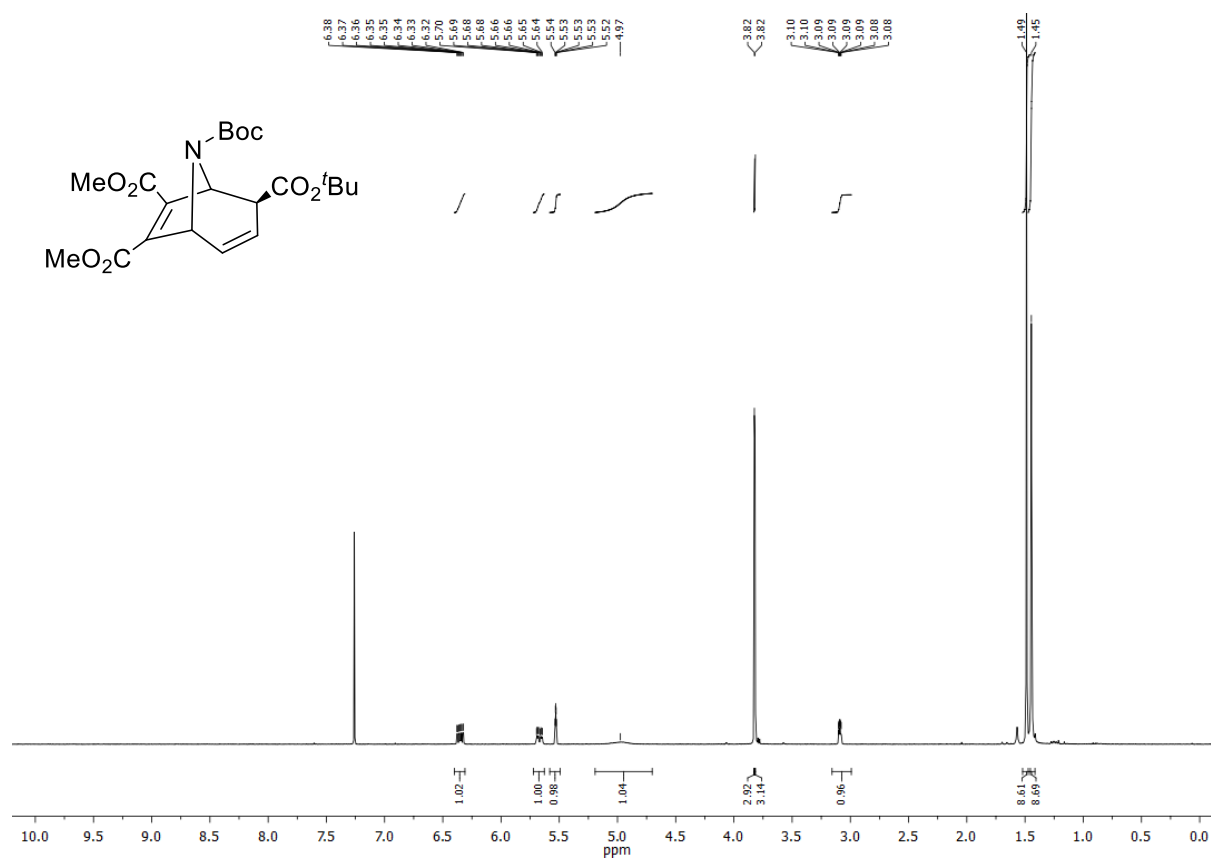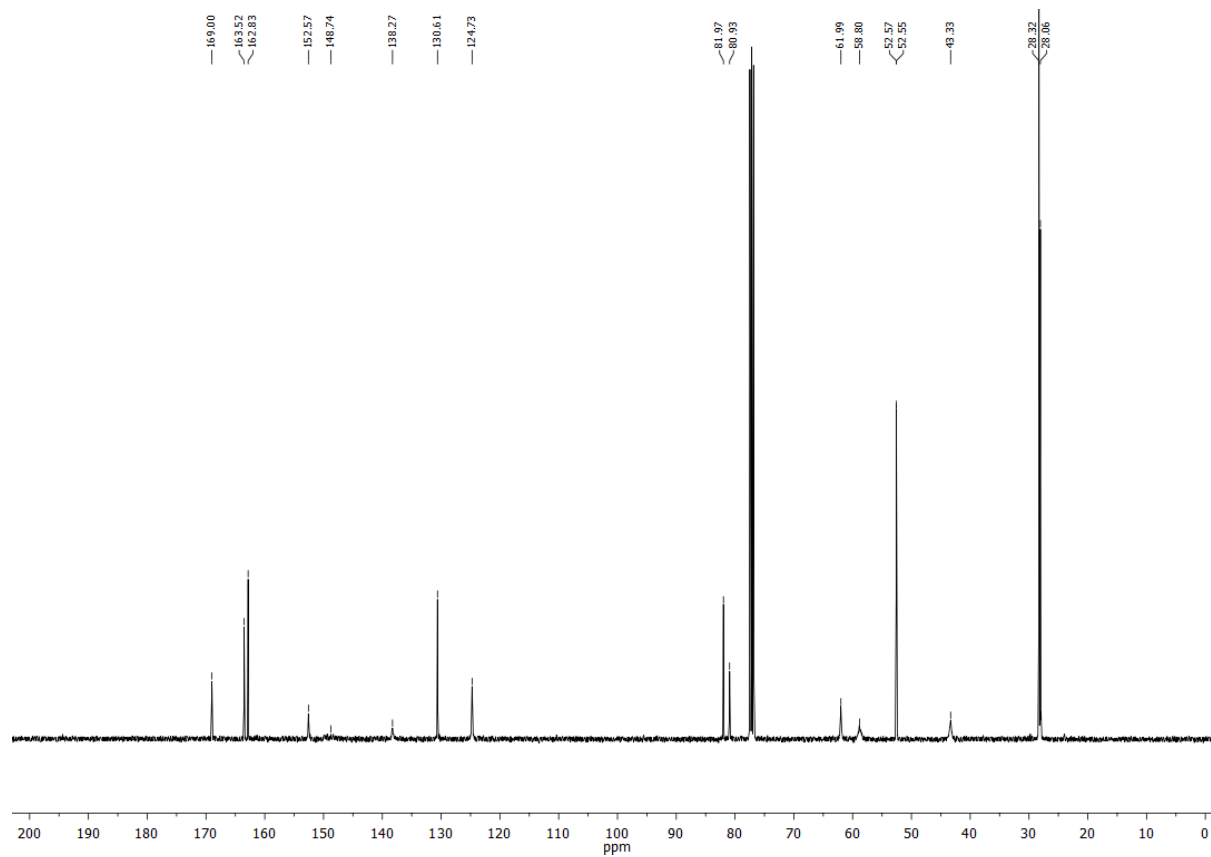

Compound **7b**,  $^1\text{H}$  NMR and  $^{13}\text{C}$  NMR ( $\text{CDCl}_3$ ):

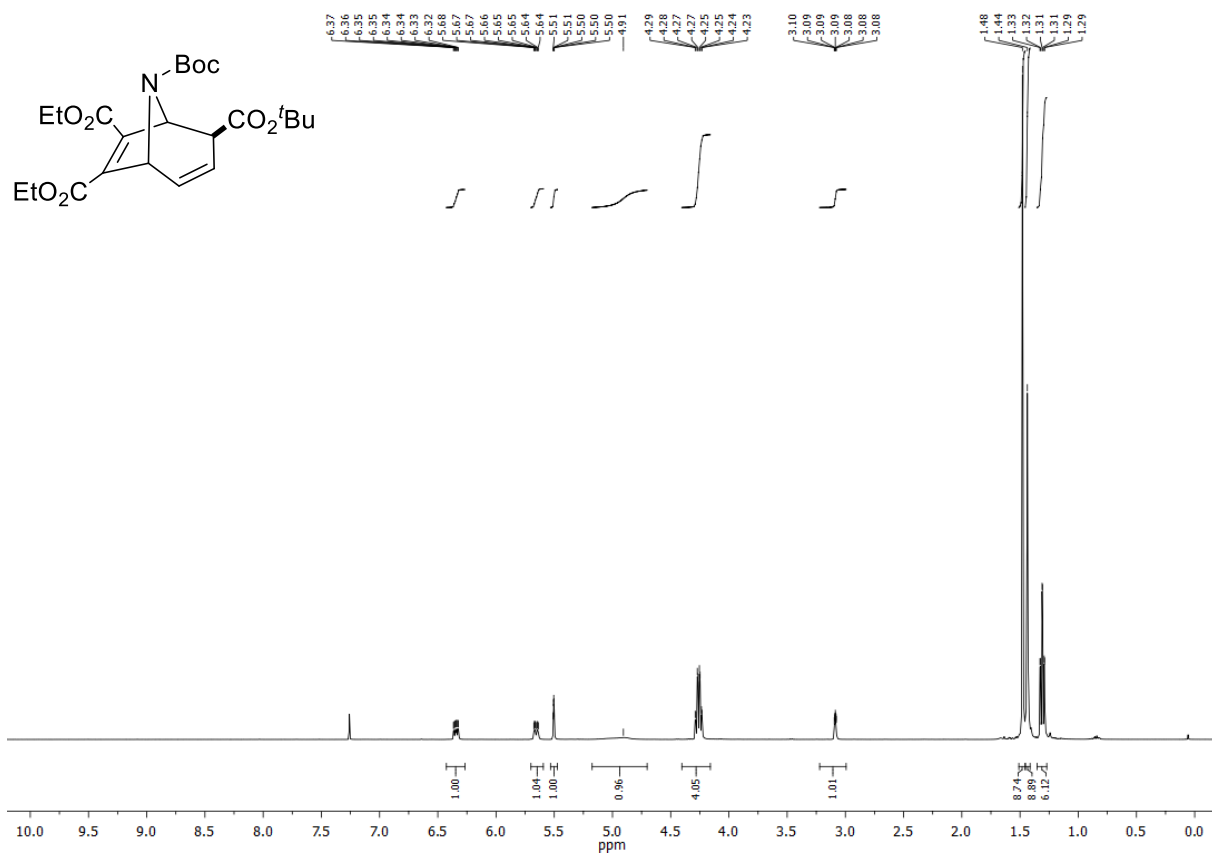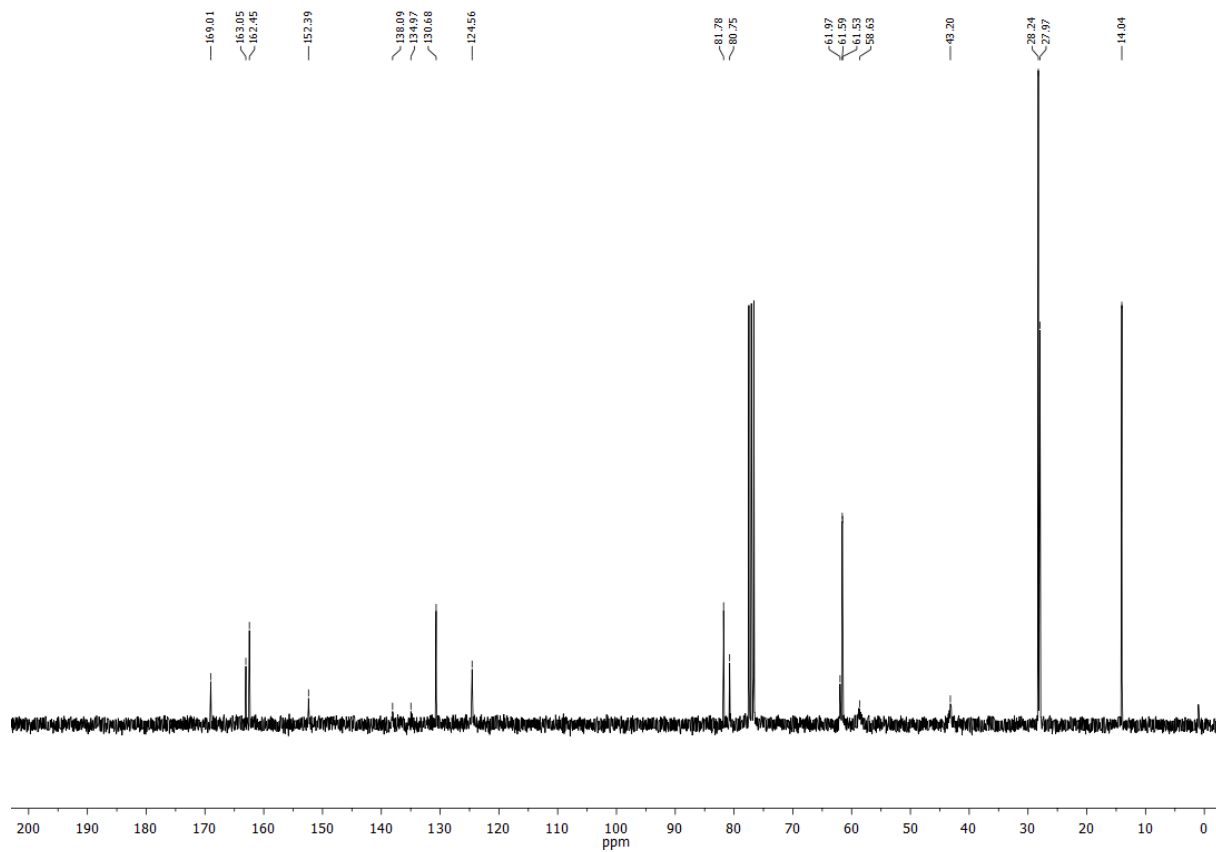

Compound **7c**,  $^1\text{H}$  NMR and  $^{13}\text{C}$  NMR ( $\text{CDCl}_3$ ):

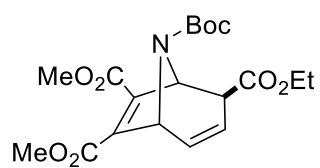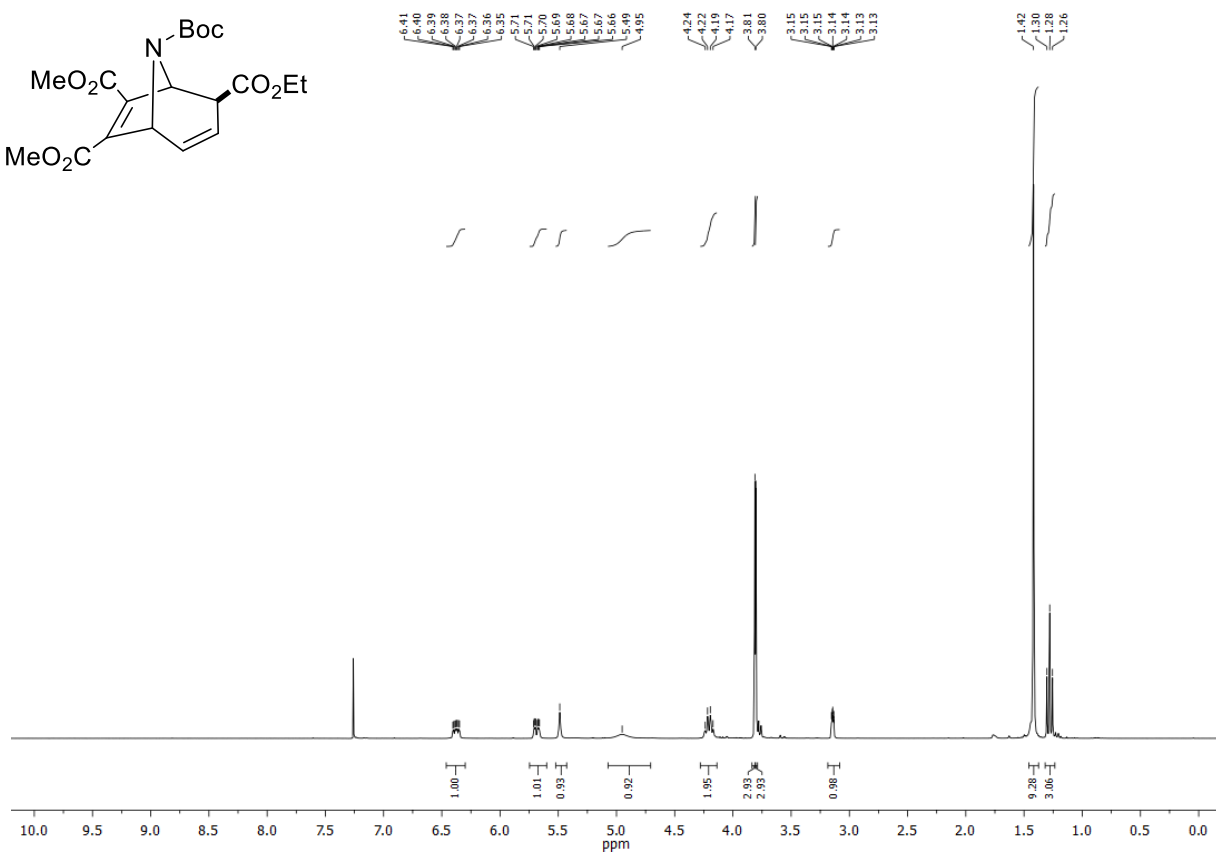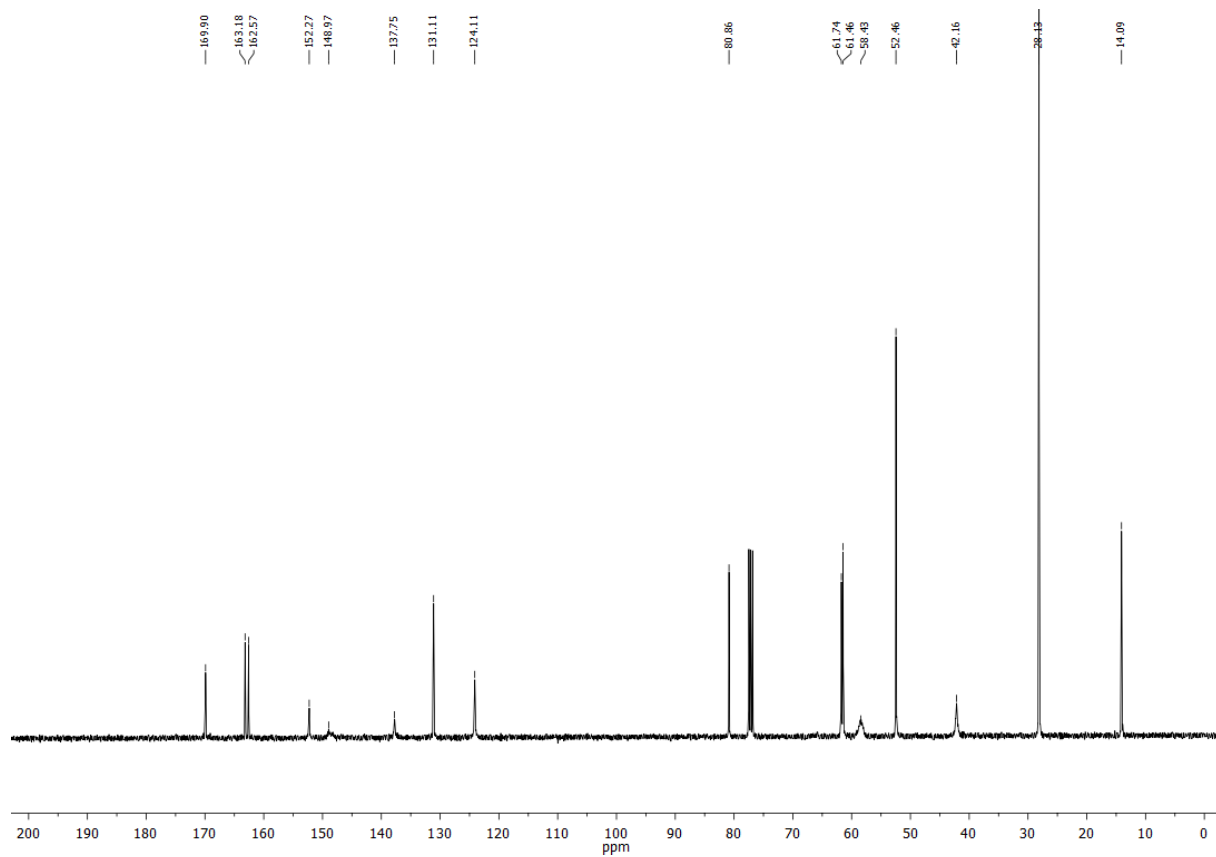

Compound **7d**,  $^1\text{H}$  NMR and  $^{13}\text{C}$  NMR ( $\text{CDCl}_3$ ):

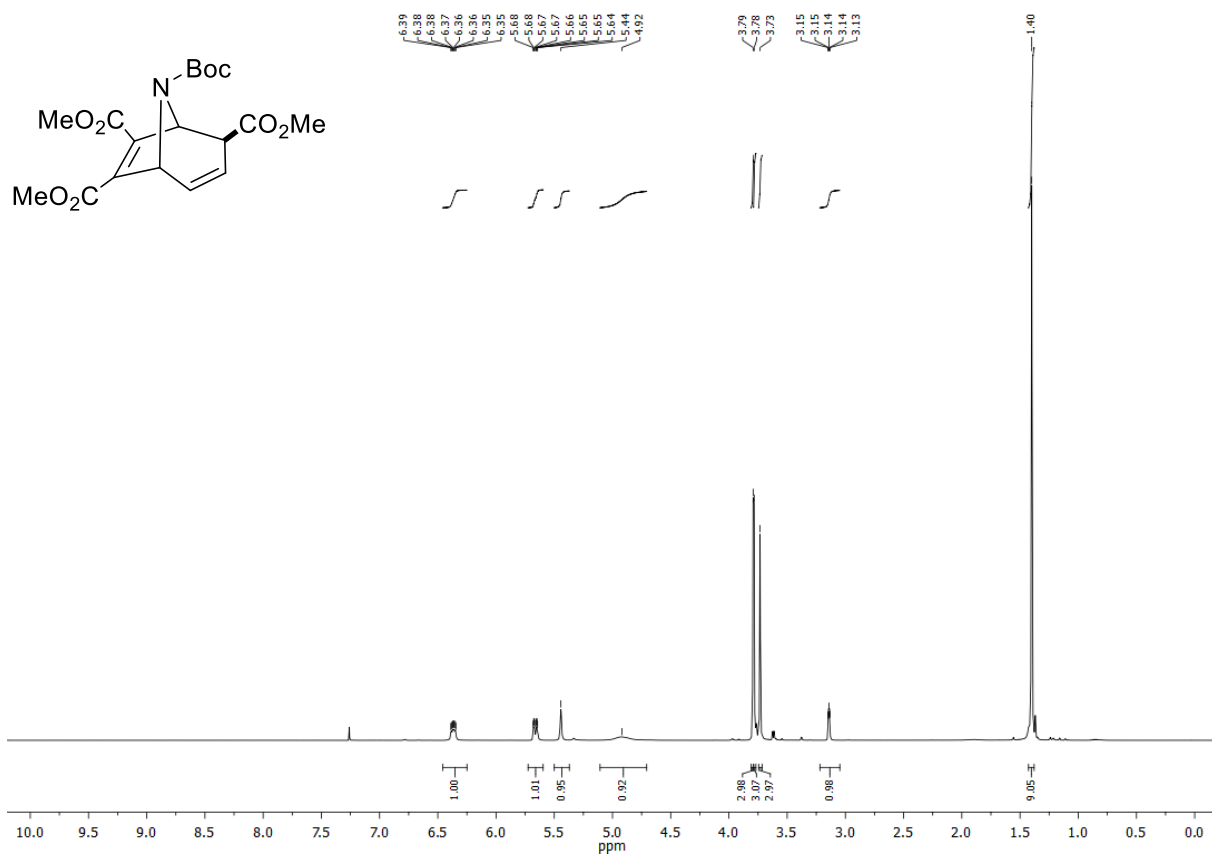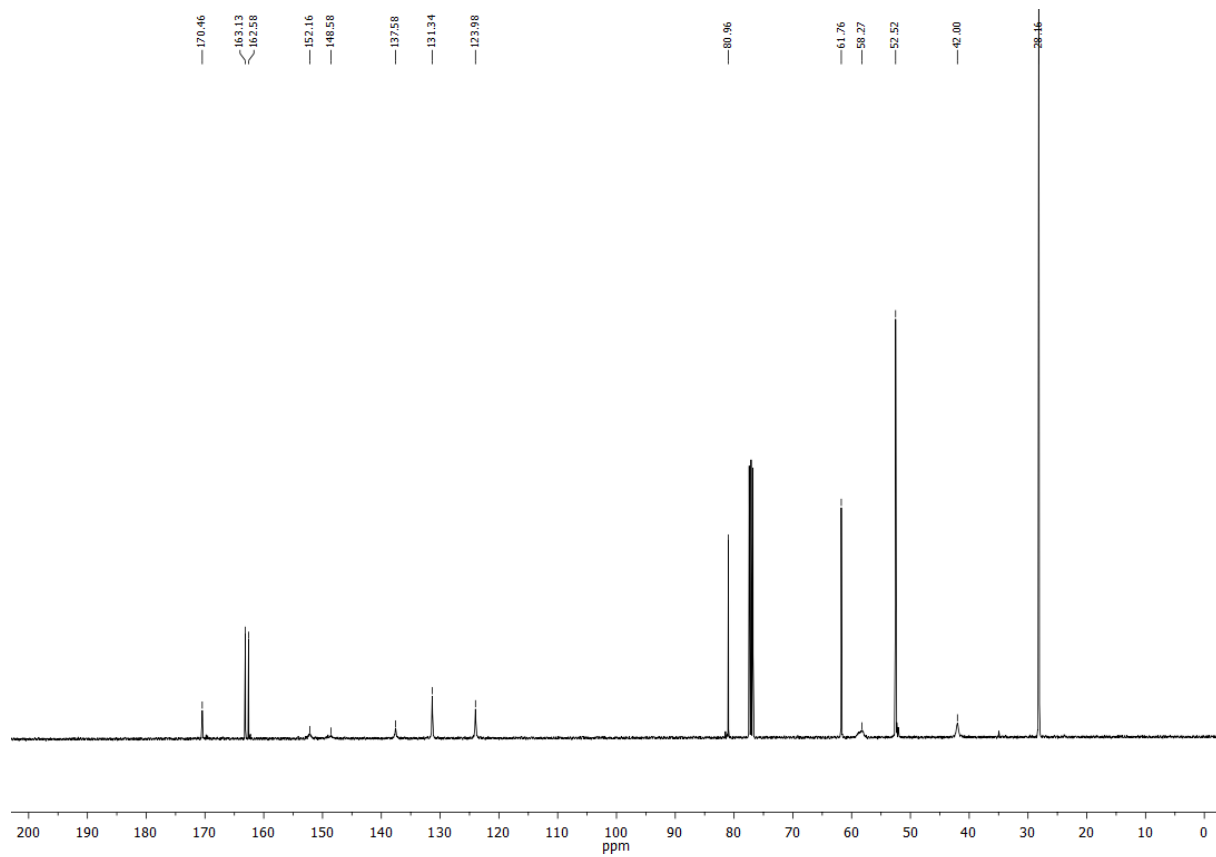





Compound **7f**,  $^1\text{H}$  NMR and  $^{13}\text{C}$  NMR ( $\text{CDCl}_3$ ):

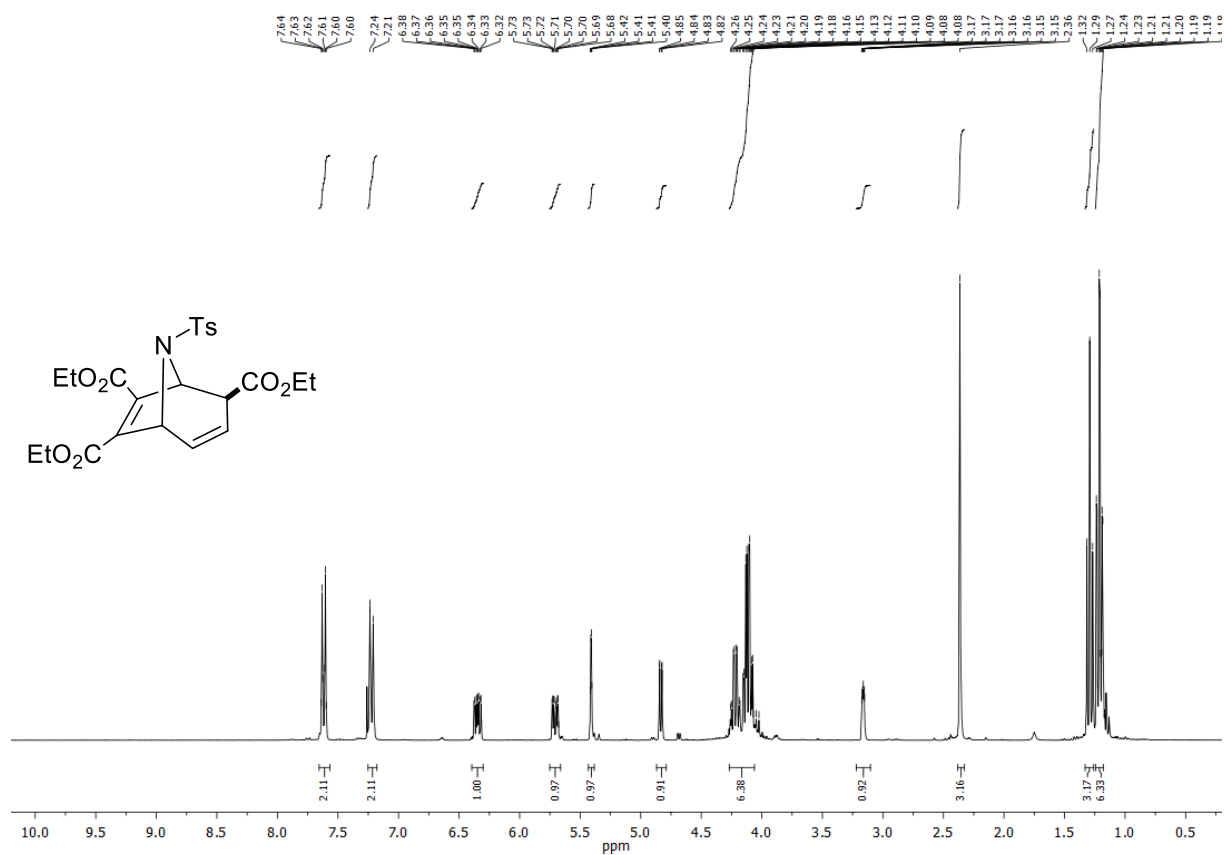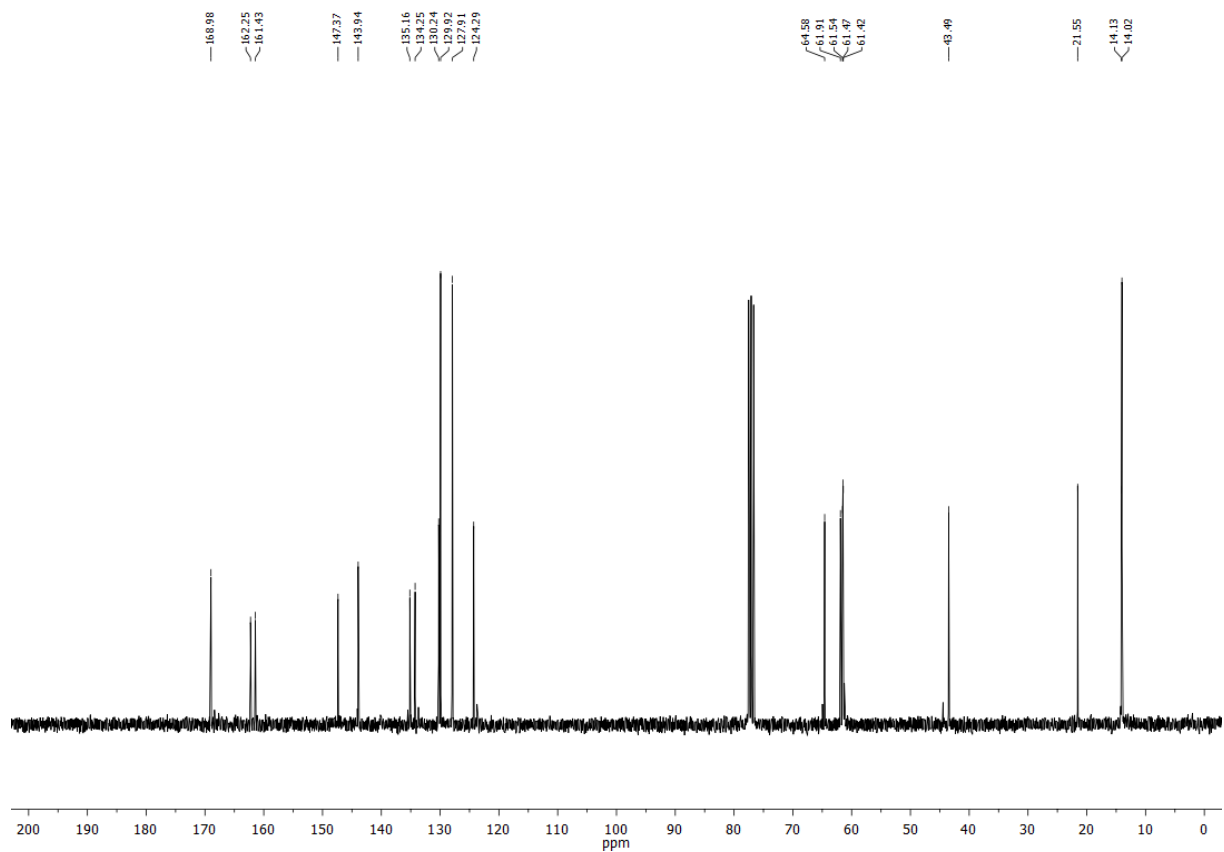

Compound **7g**,  $^1\text{H}$  NMR and  $^{13}\text{C}$  NMR ( $\text{CDCl}_3$ ):

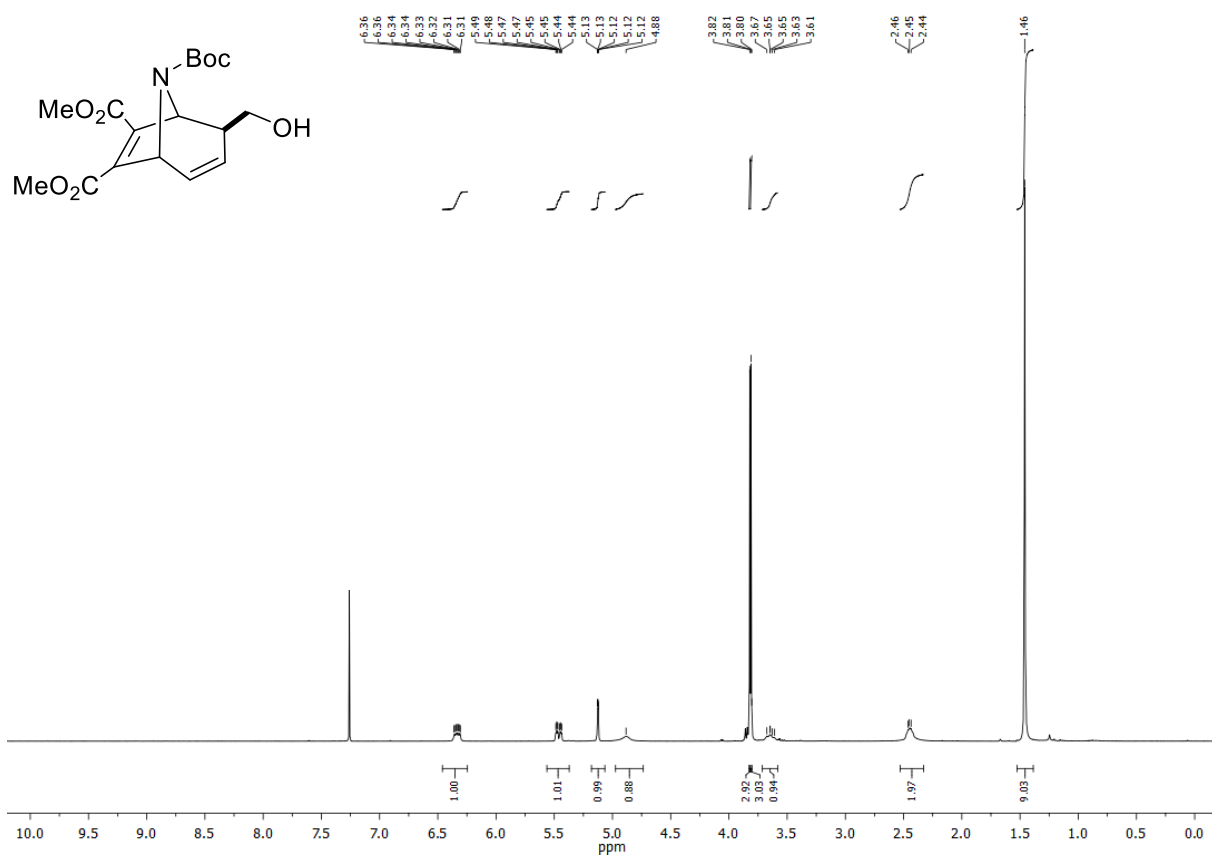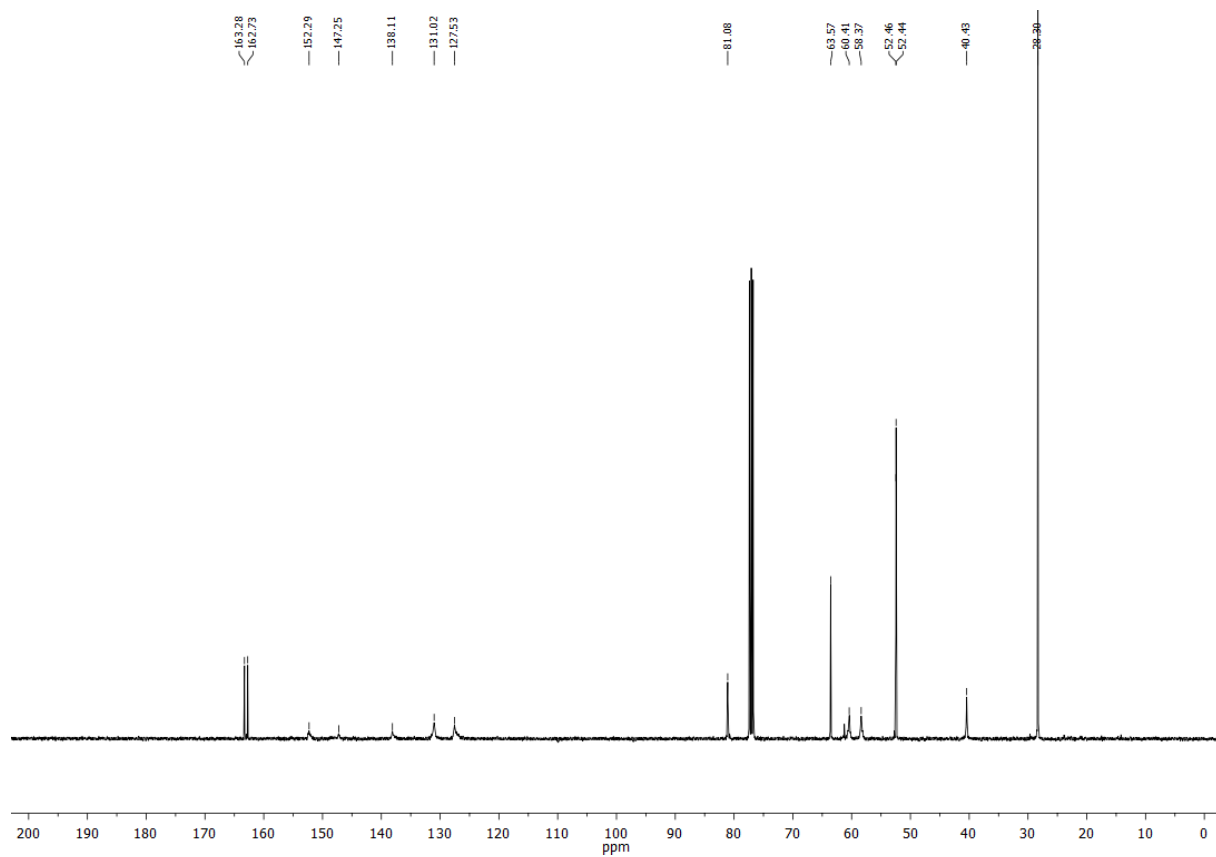

Compound **7h**,  $^1\text{H}$  NMR and  $^{13}\text{C}$  NMR ( $\text{CDCl}_3$ ):

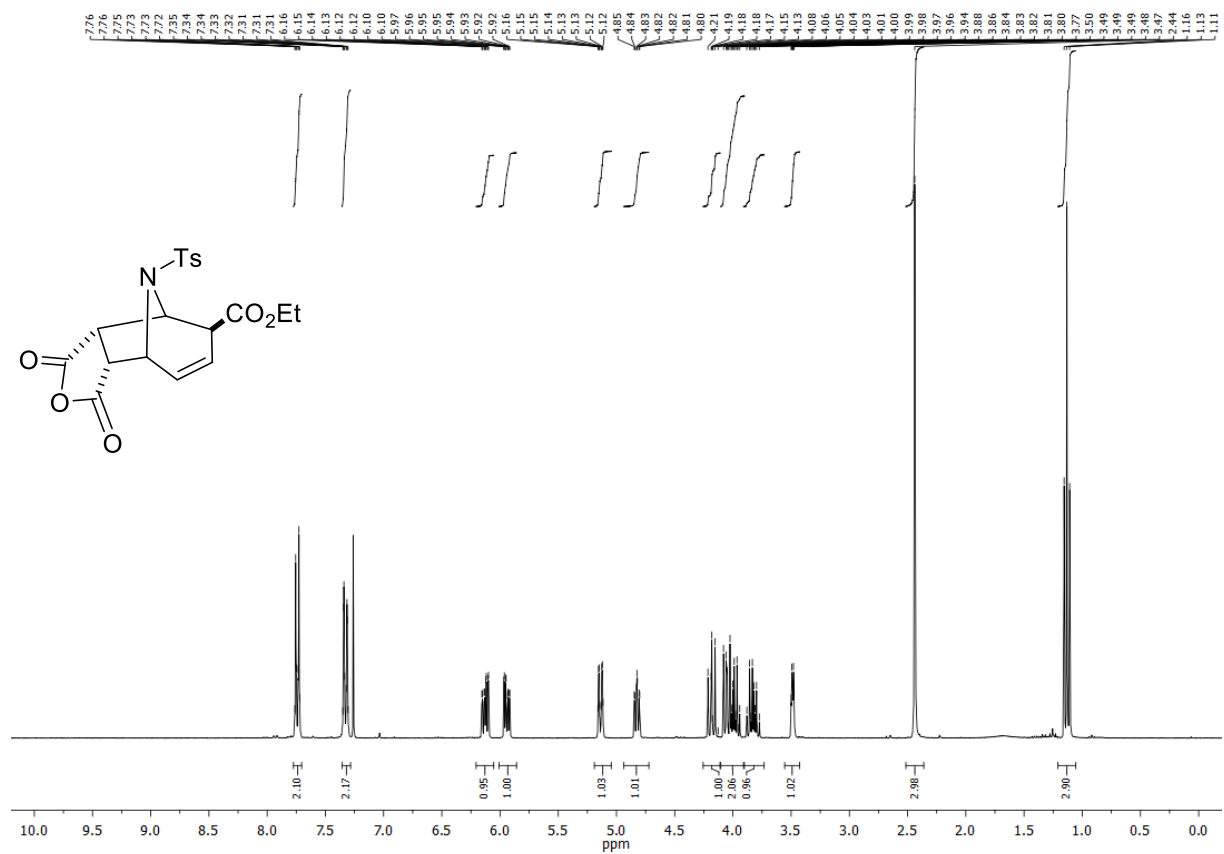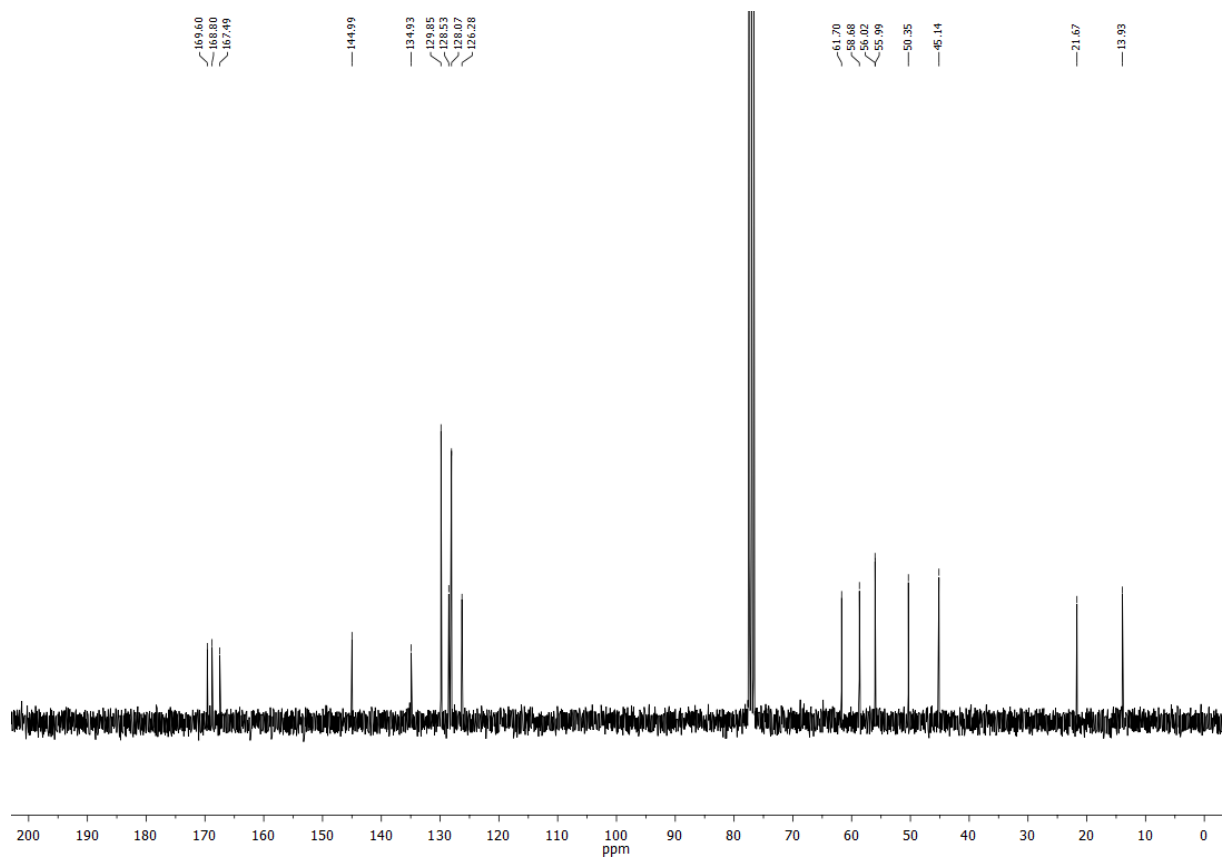

Compound **7i**,  $^1\text{H}$  NMR and  $^{13}\text{C}$  NMR ( $\text{CDCl}_3$ ):

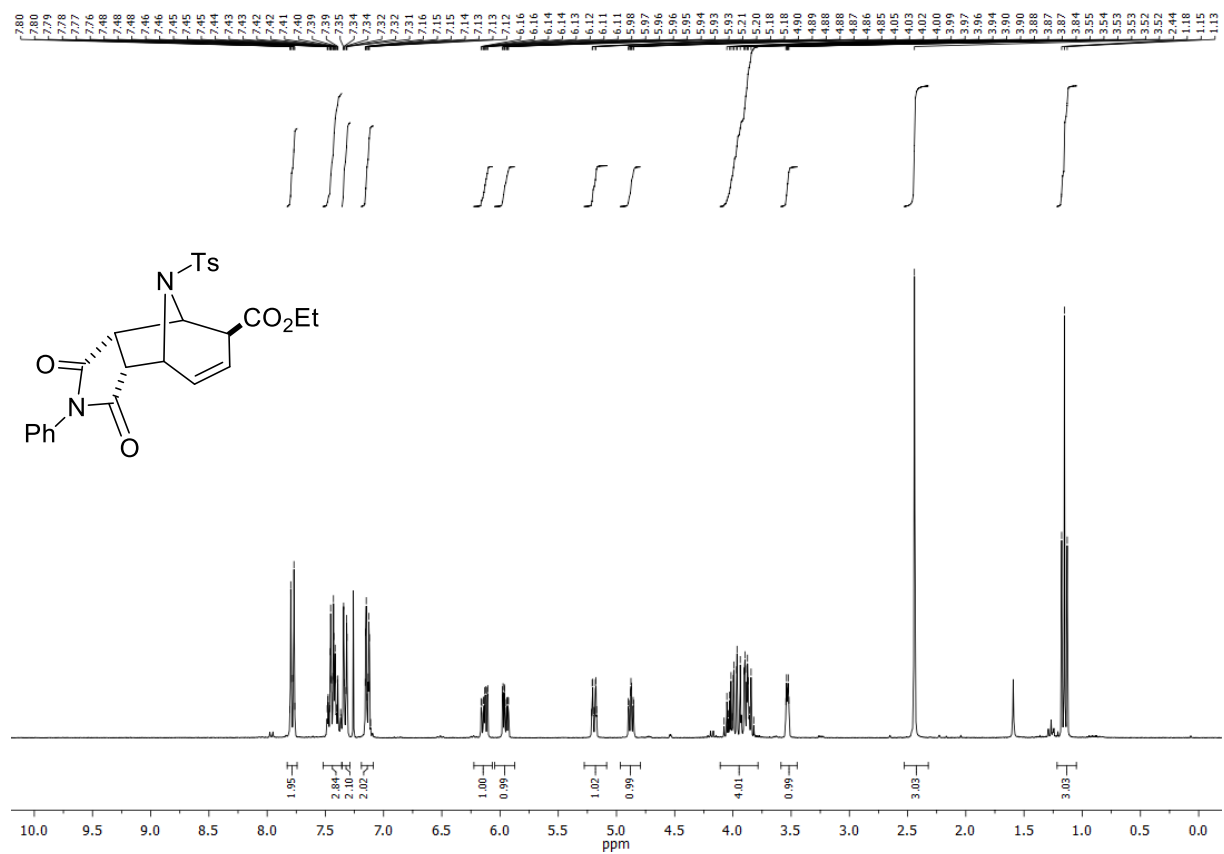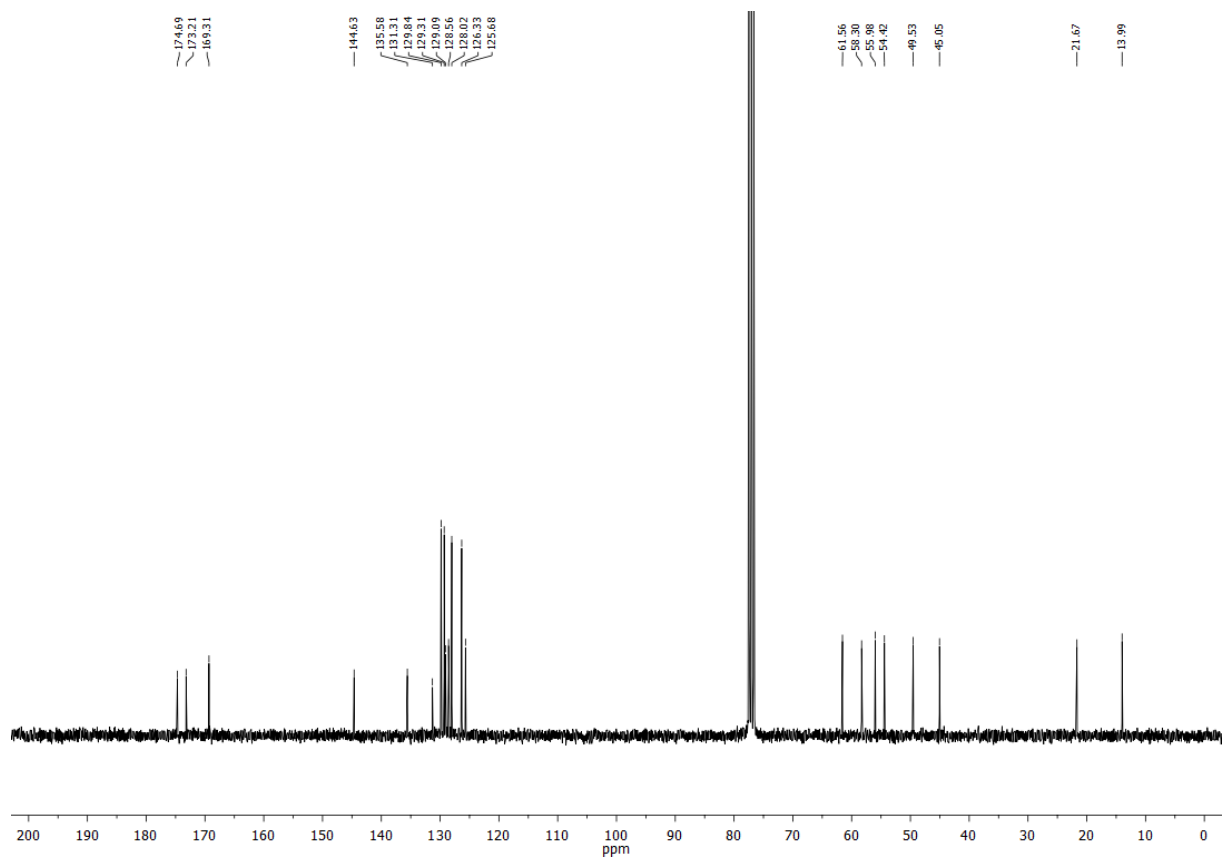

Compound *major 7j*,  $^1\text{H}$  NMR and  $^{13}\text{C}$  NMR ( $\text{CDCl}_3$ ):

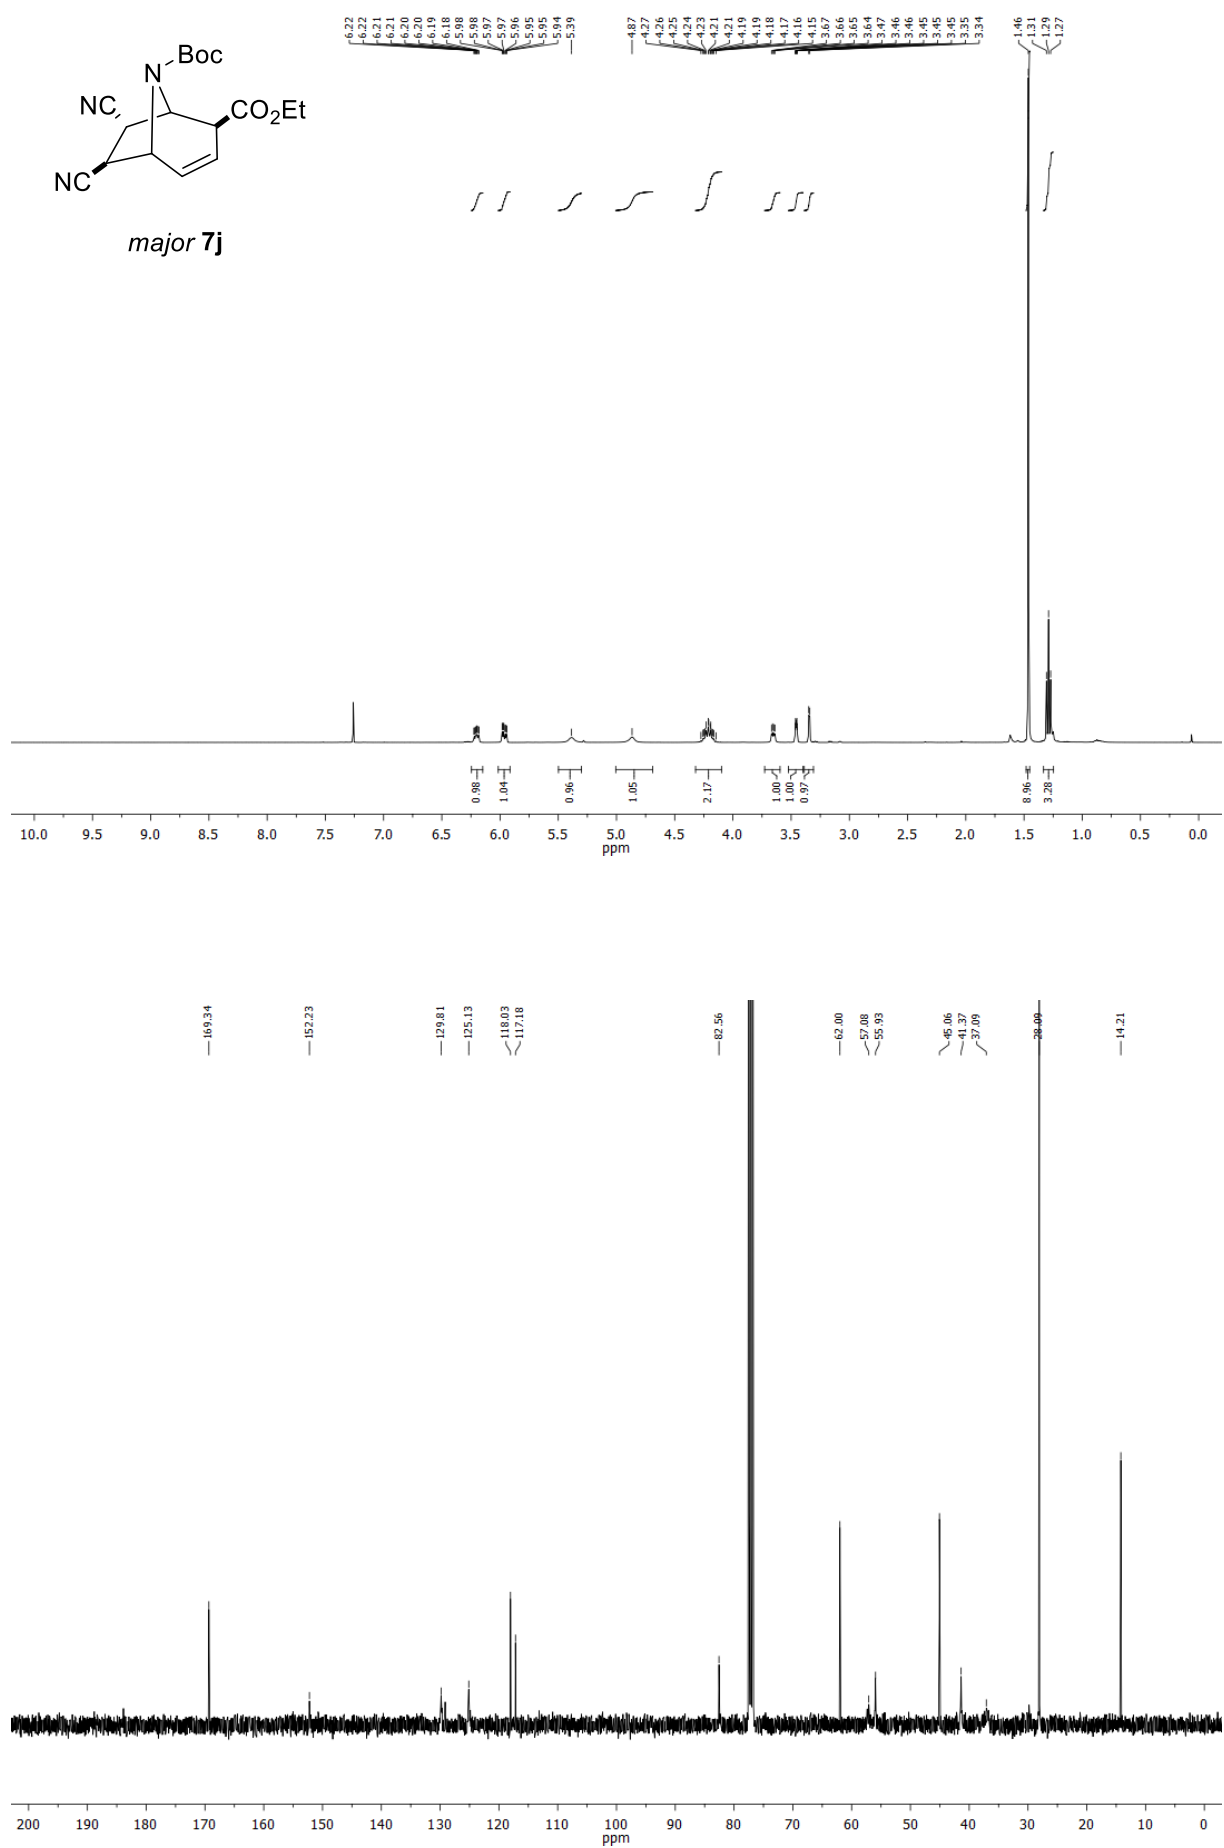

Compound *major 7j* and *minor 7j*,  $^1\text{H}$  NMR and  $^{13}\text{C}$  NMR ( $\text{CDCl}_3$ ):

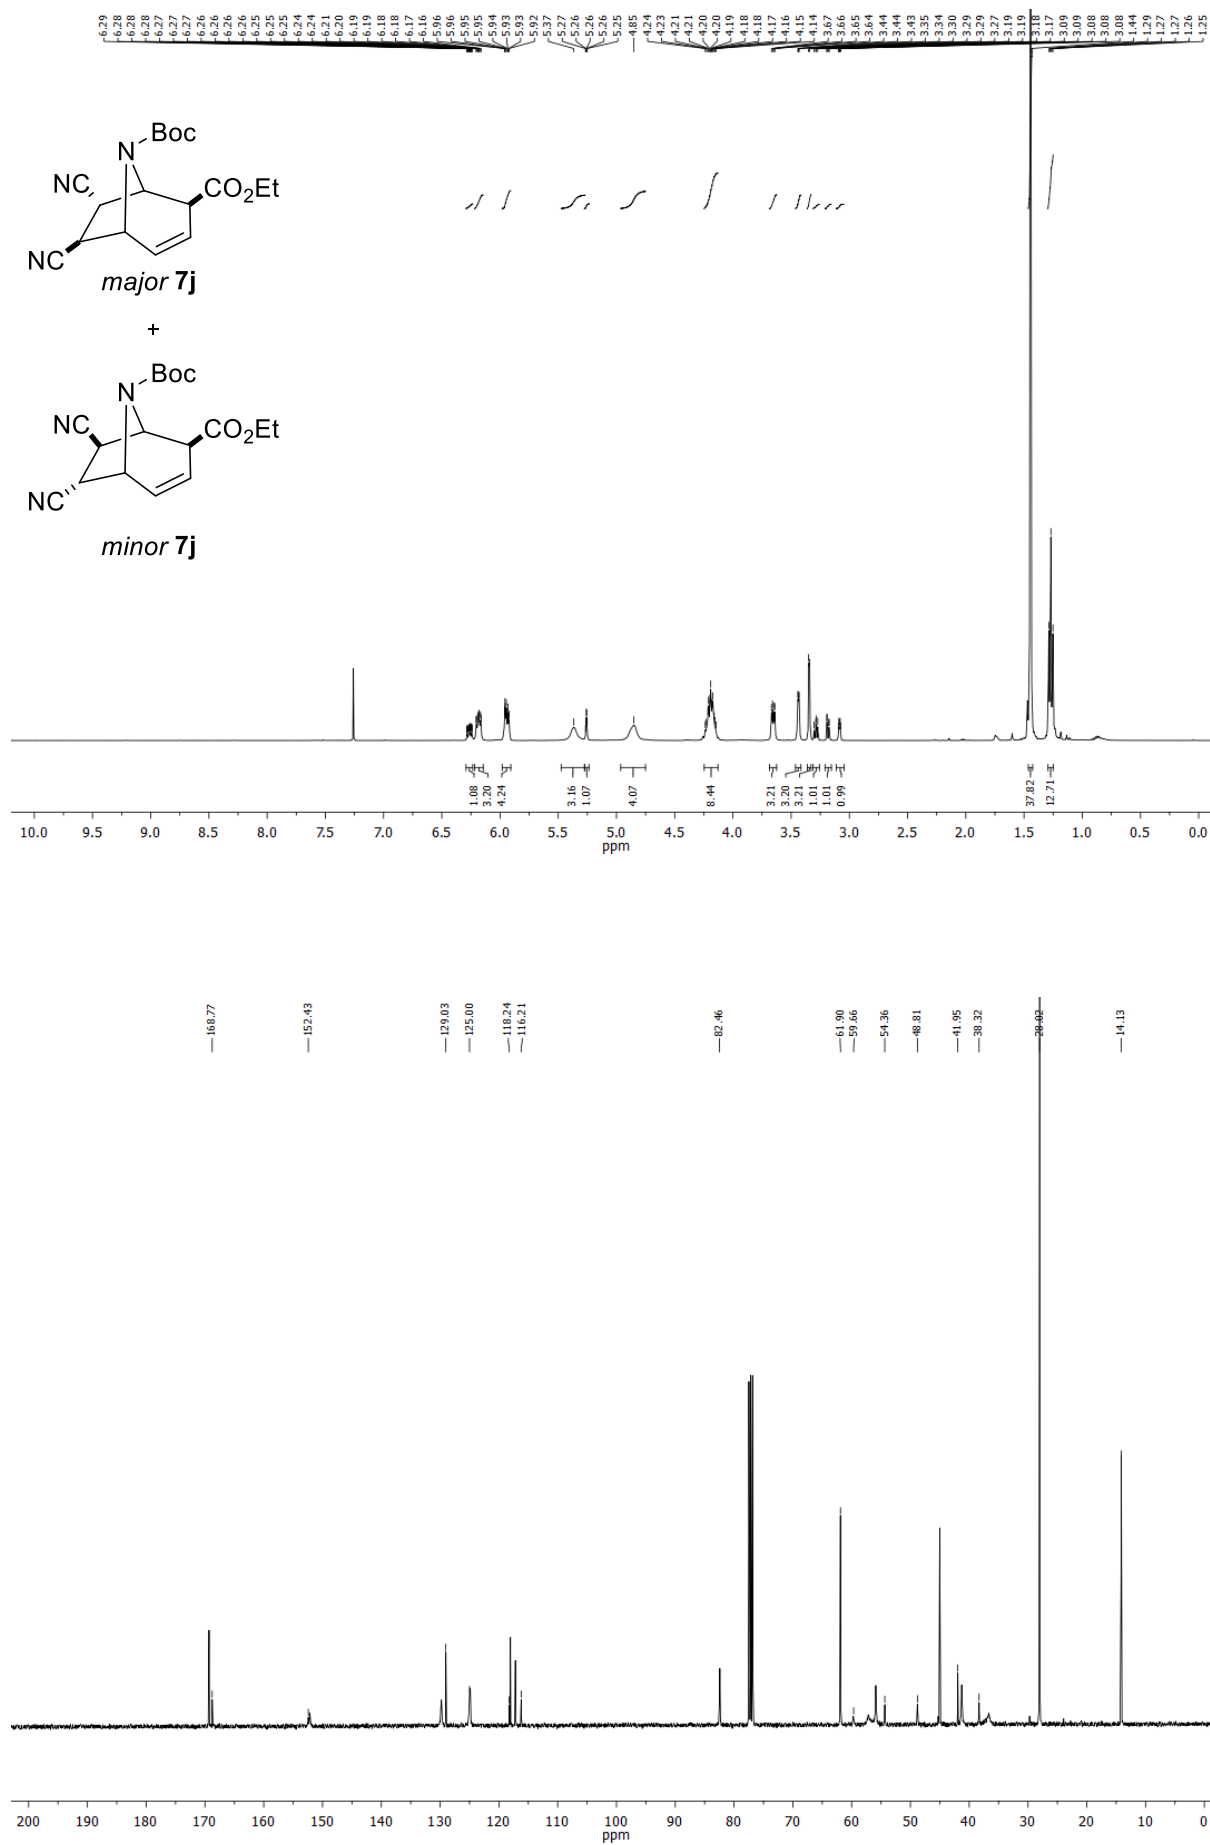

Compound **7k**, <sup>1</sup>H NMR and <sup>13</sup>C NMR (CDCl<sub>3</sub>):

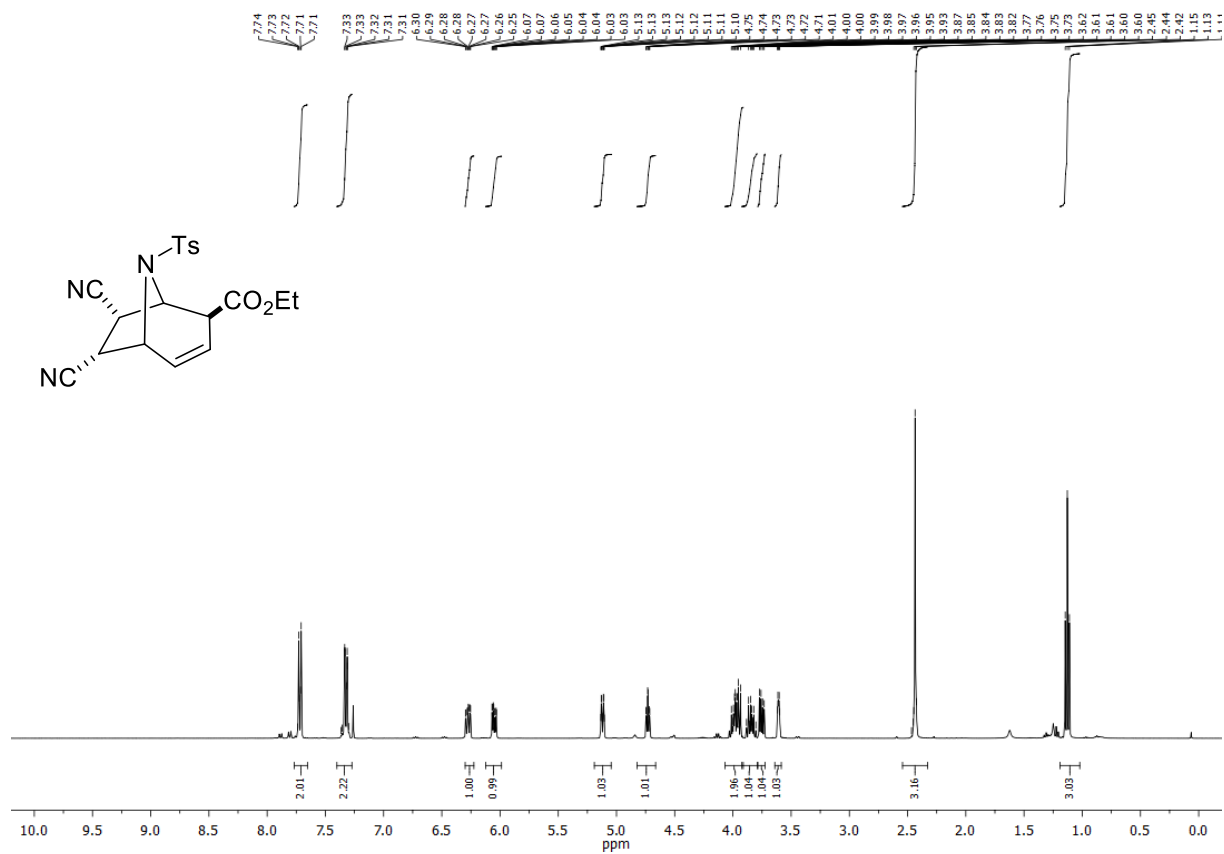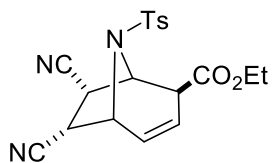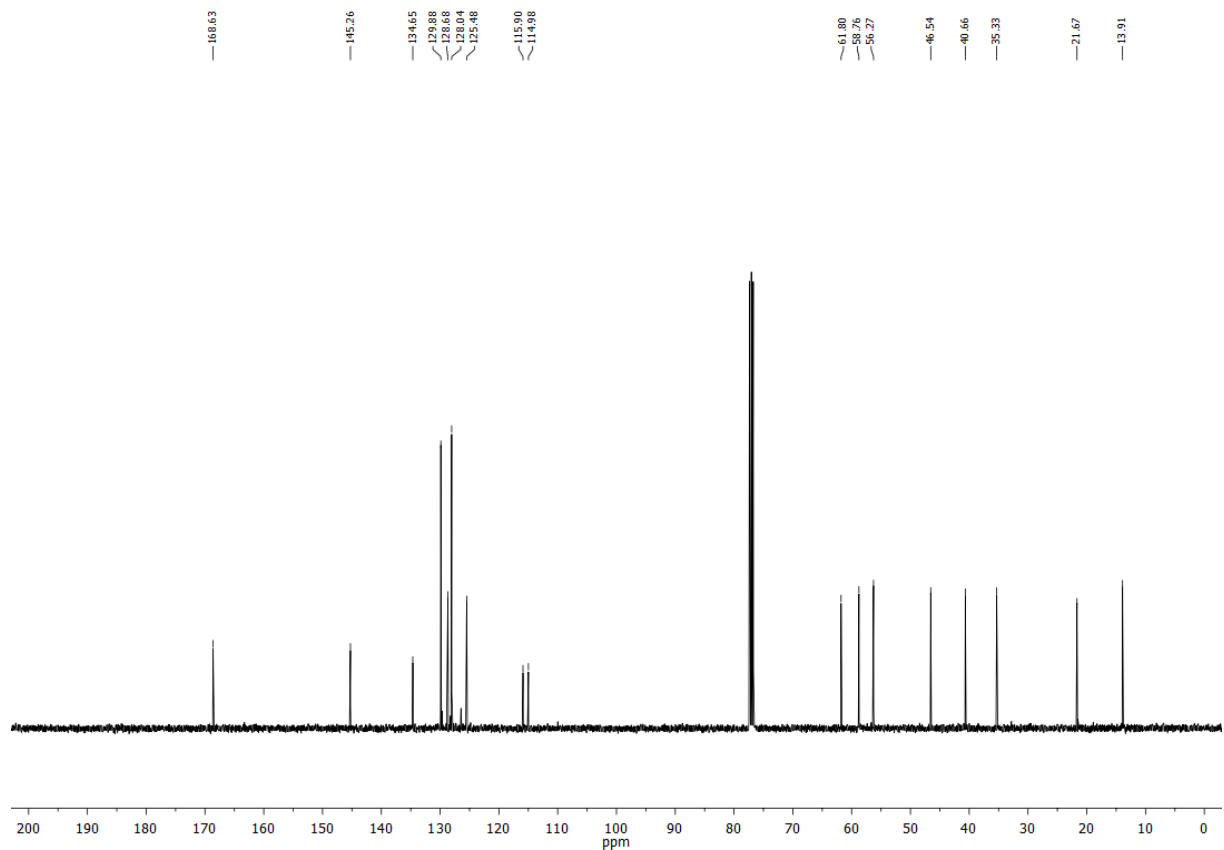

Compound **endo (-)-71**,  $^1\text{H}$  NMR and  $^{13}\text{C}$  NMR ( $\text{CDCl}_3$ ):

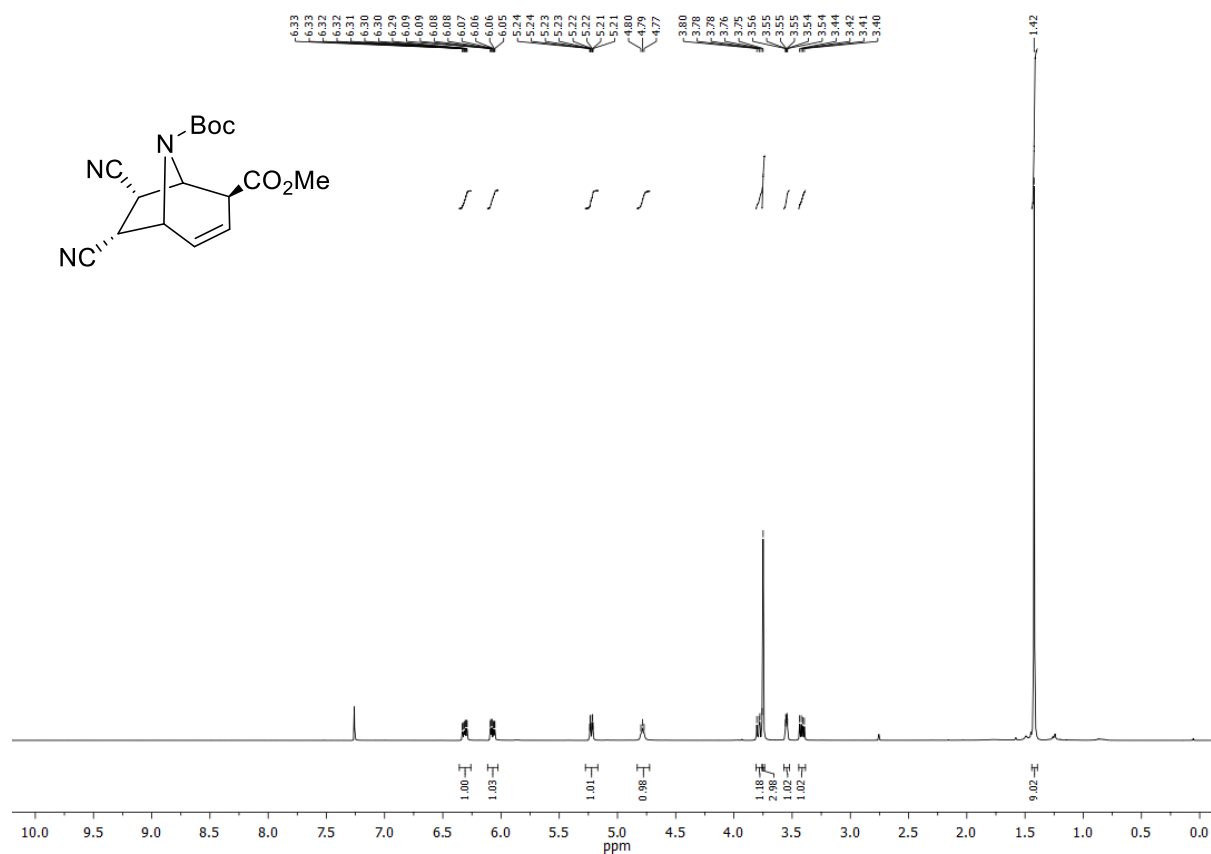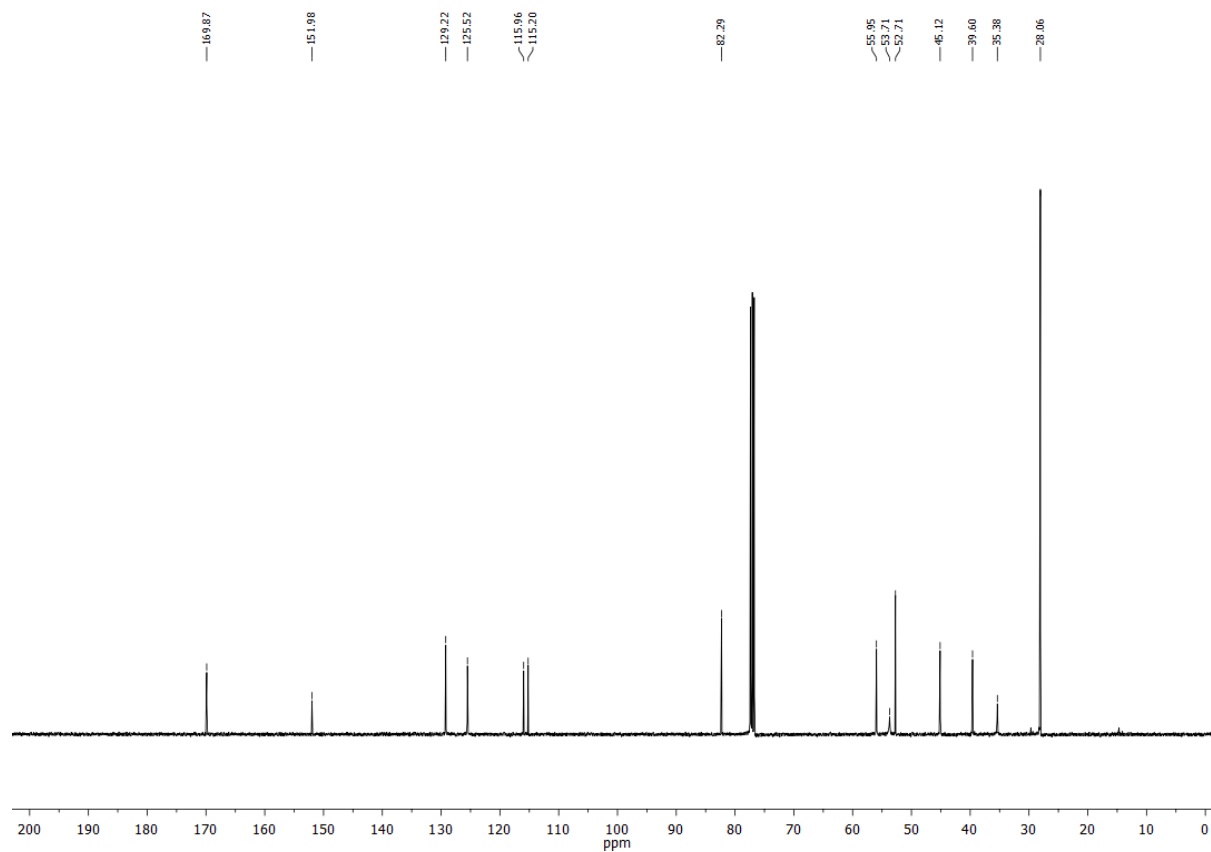



Compound **exo (-)-7I**,  $^1\text{H}$  NMR and  $^{13}\text{C}$  NMR ( $\text{CDCl}_3$ ):

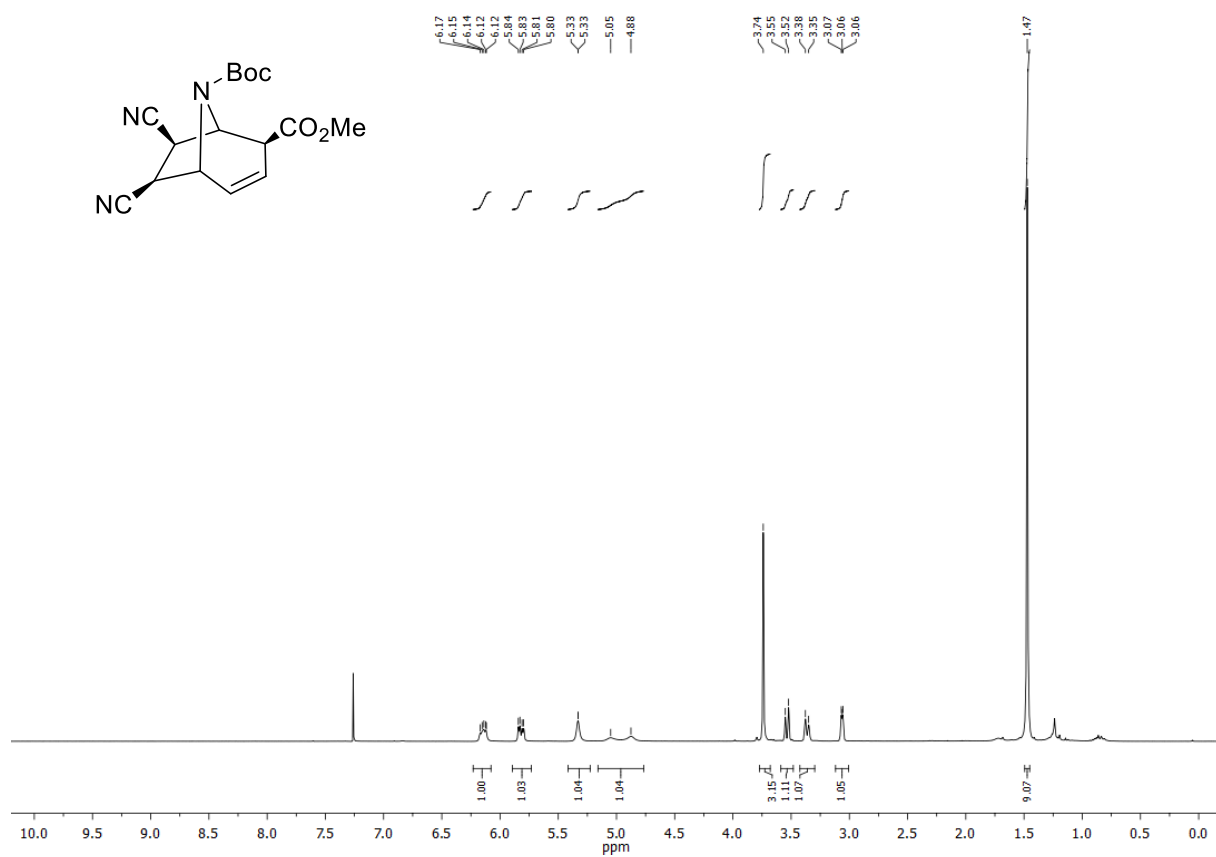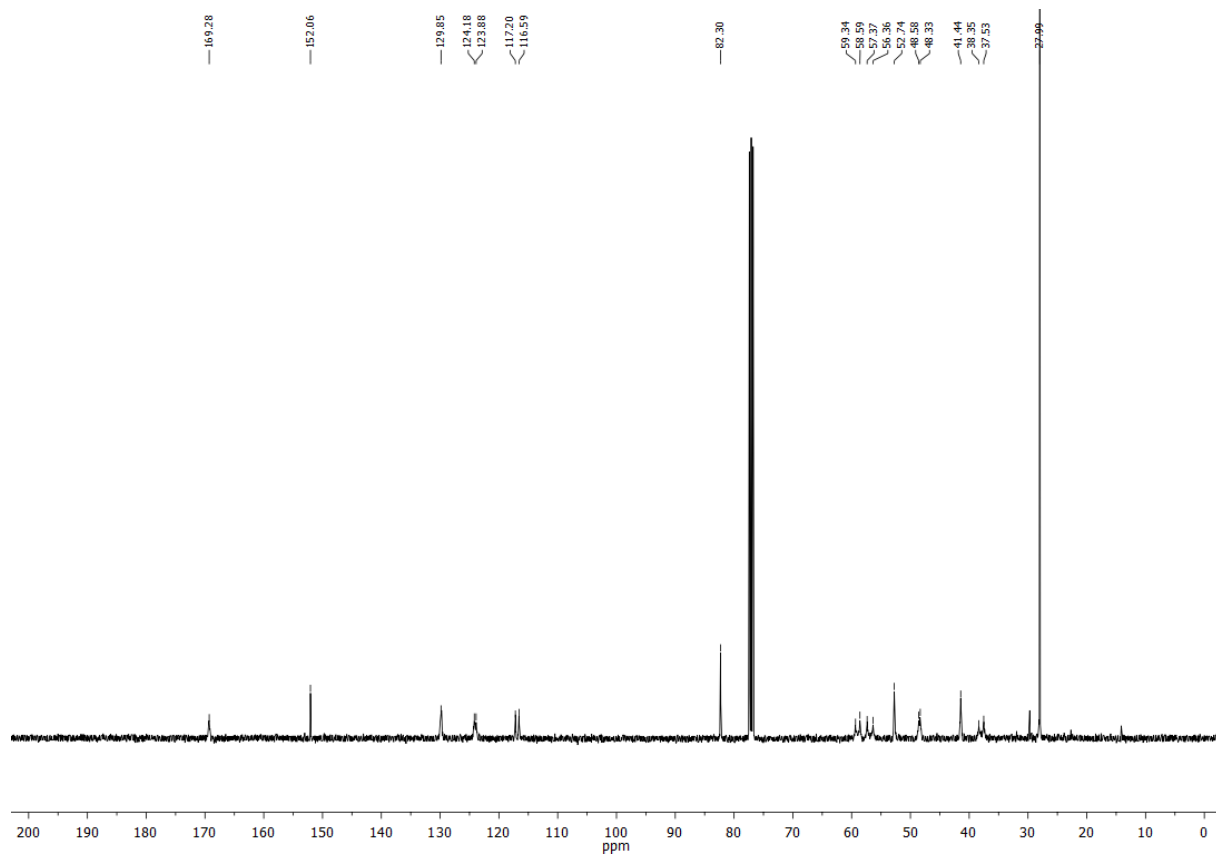

Compound *major 7m*,  $^1\text{H}$  NMR and  $^{13}\text{C}$  NMR ( $\text{CDCl}_3$ ):

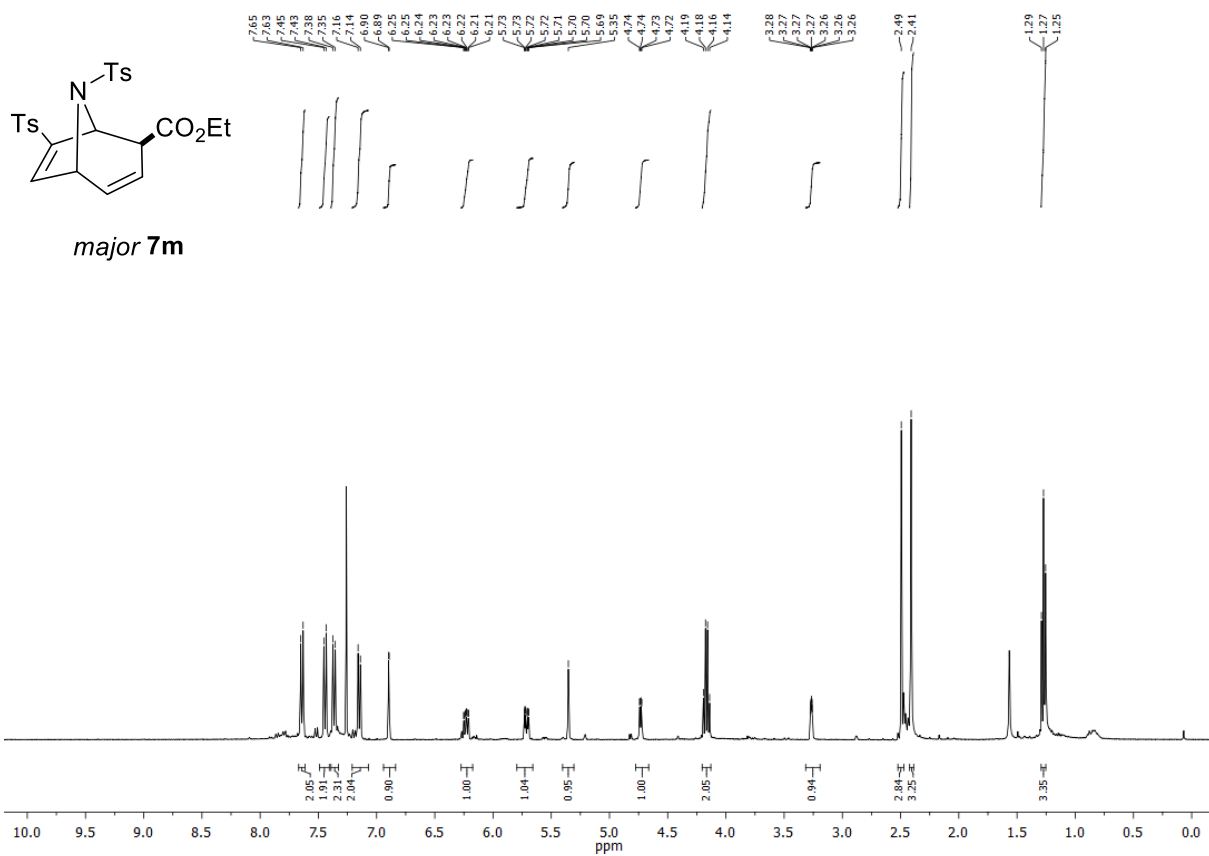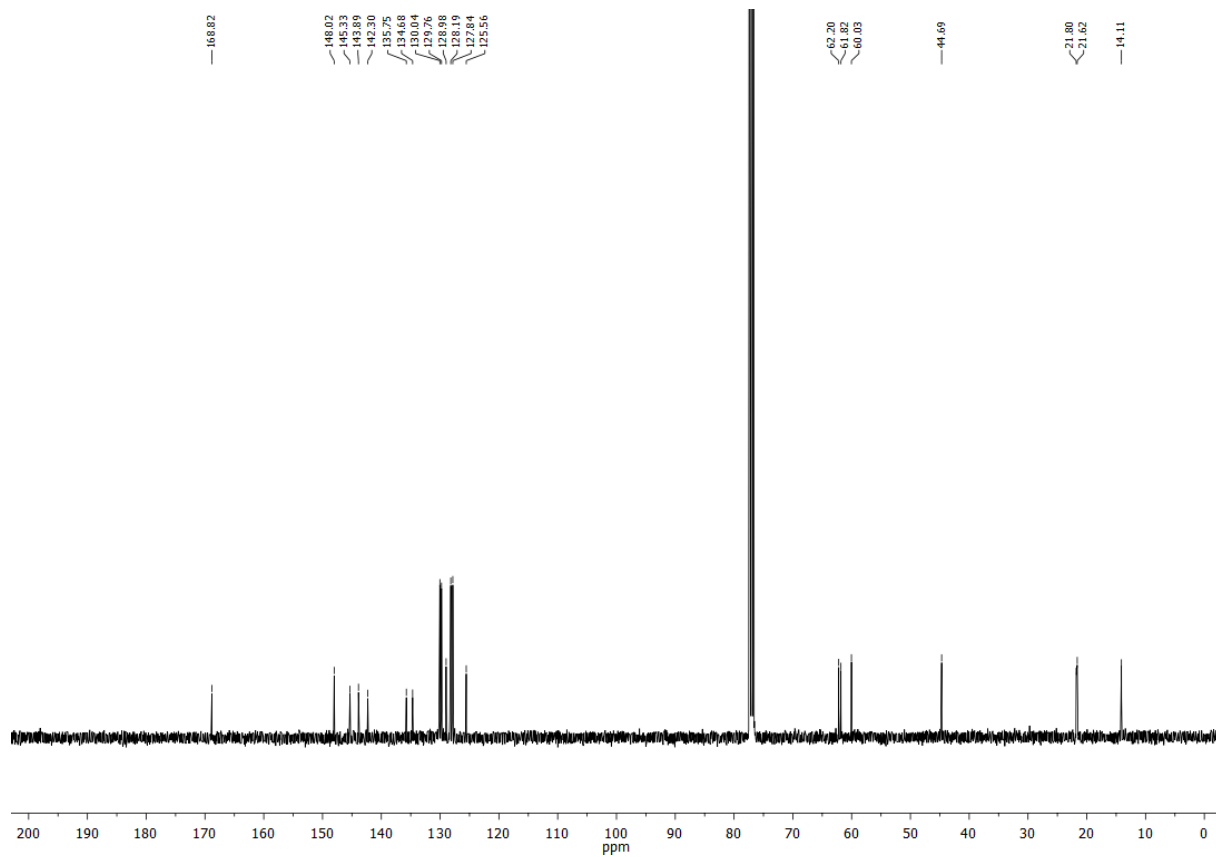

Compound *major* and *minor 7m*,  $^1\text{H}$  NMR and  $^{13}\text{C}$  NMR ( $\text{CDCl}_3$ ):

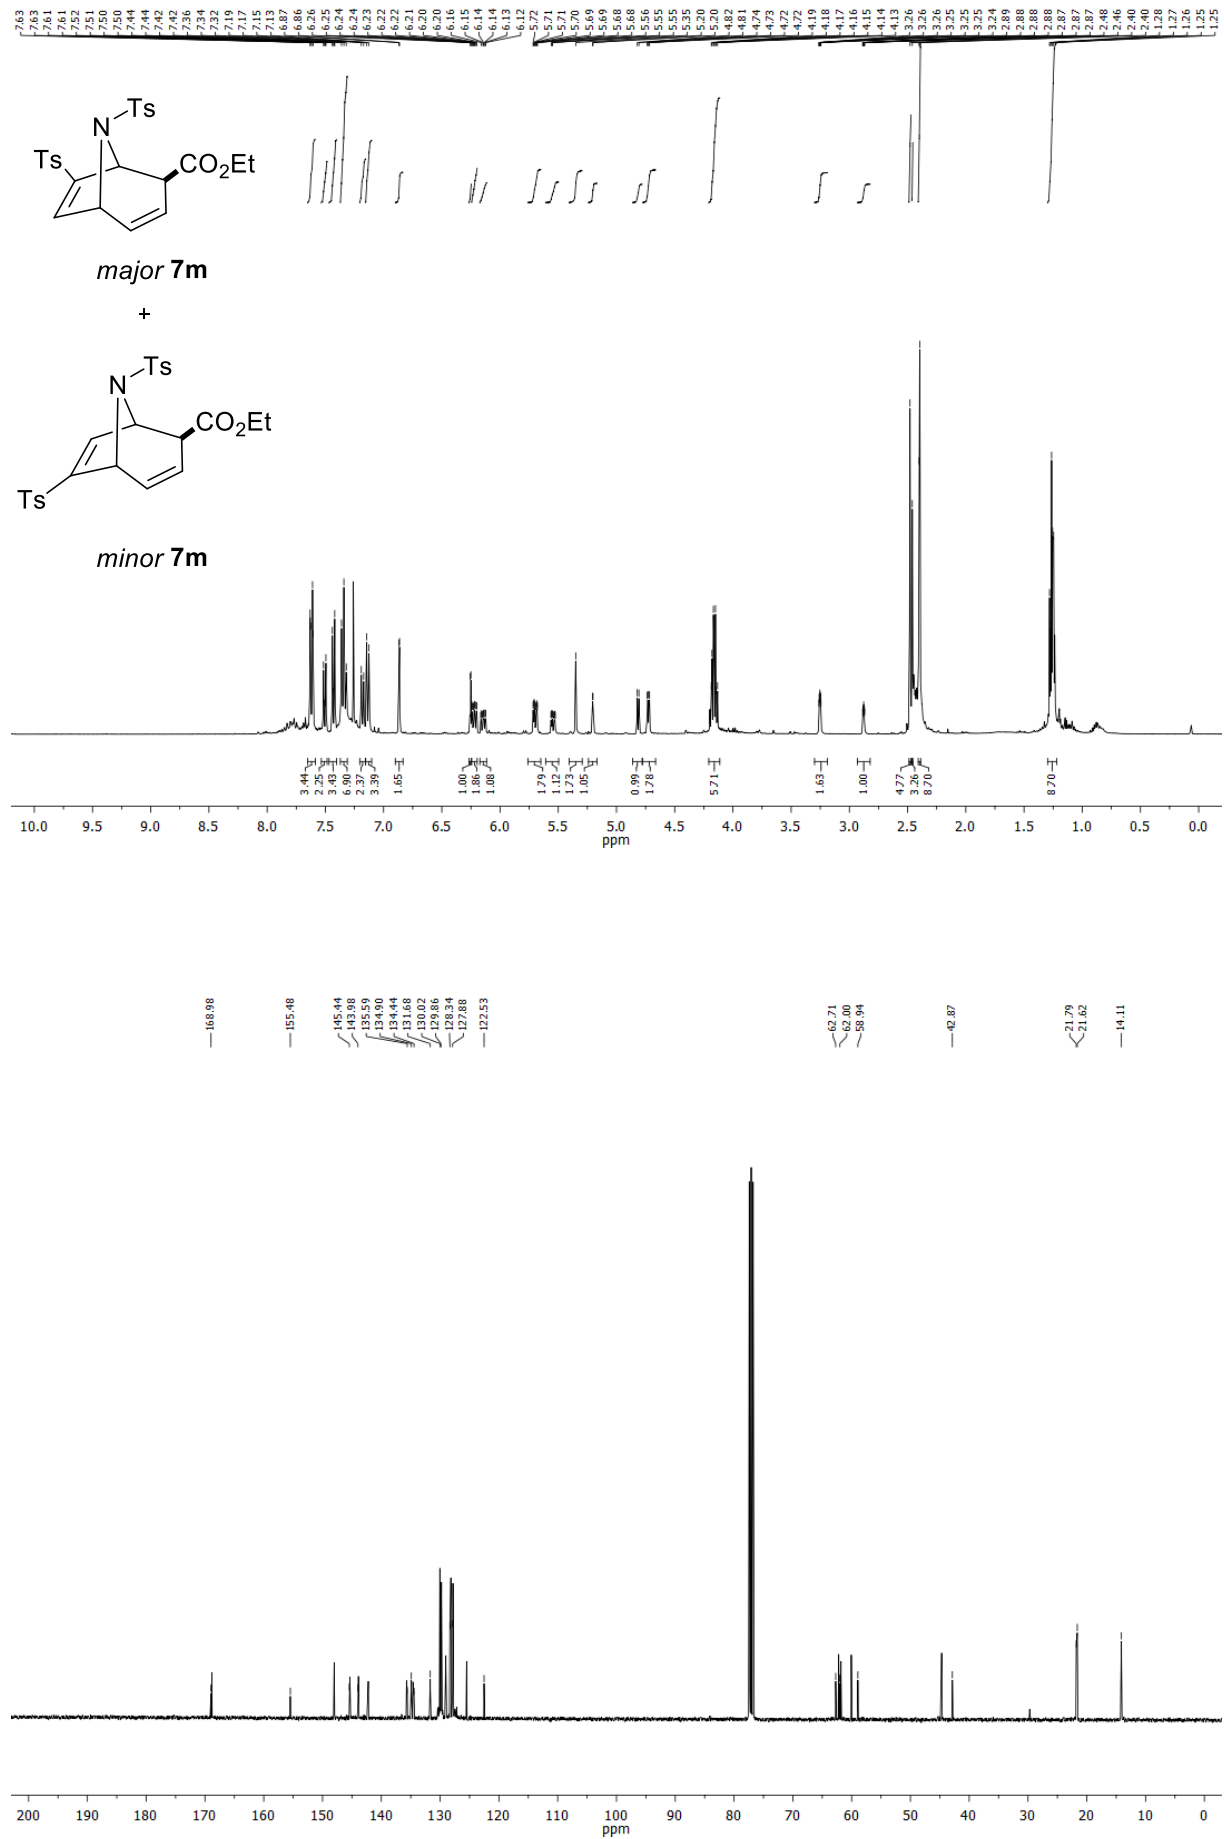

Compound (+)-**8a**,  $^1\text{H}$  NMR and  $^{13}\text{C}$  NMR ( $\text{CDCl}_3$ ):

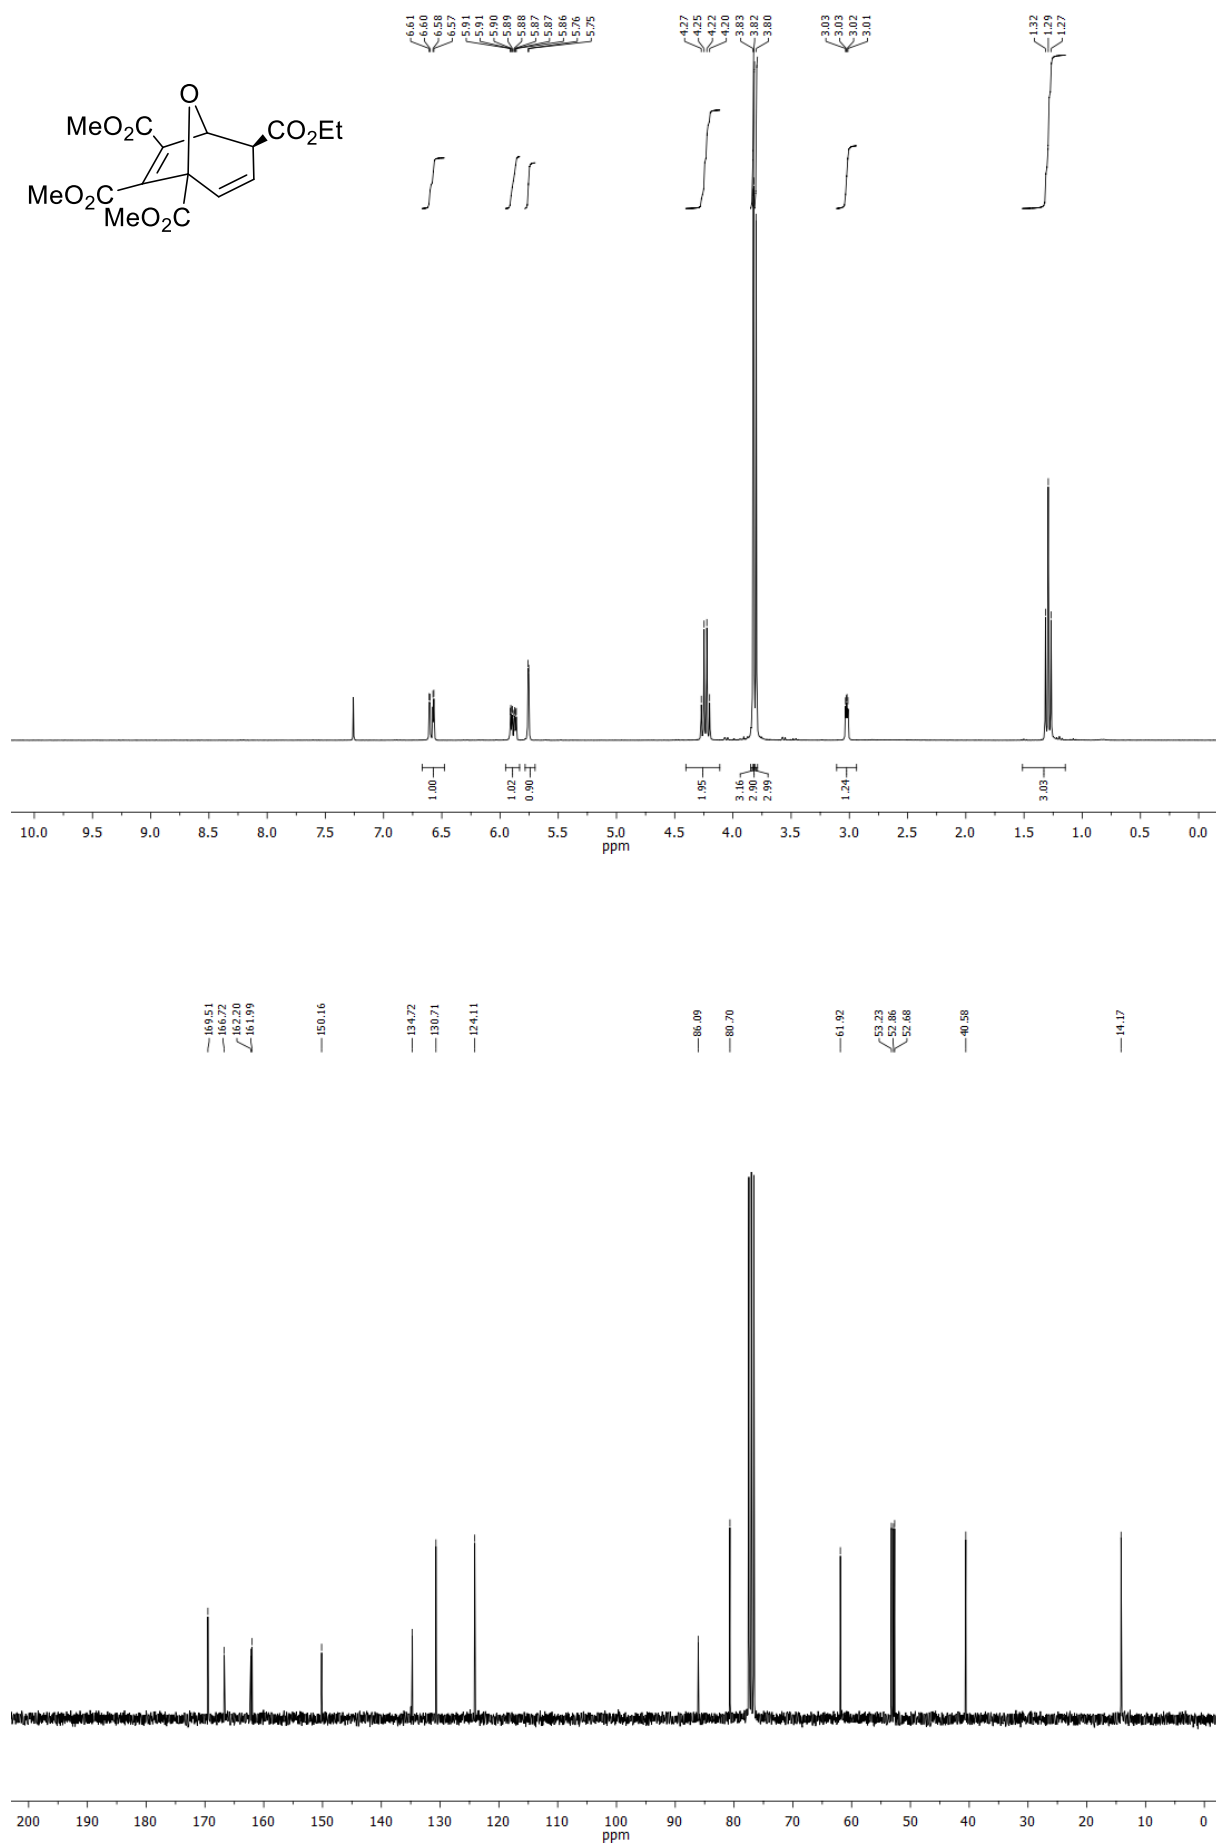

Compound **8b**,  $^1\text{H}$  NMR and  $^{13}\text{C}$  NMR ( $\text{CDCl}_3$ ):

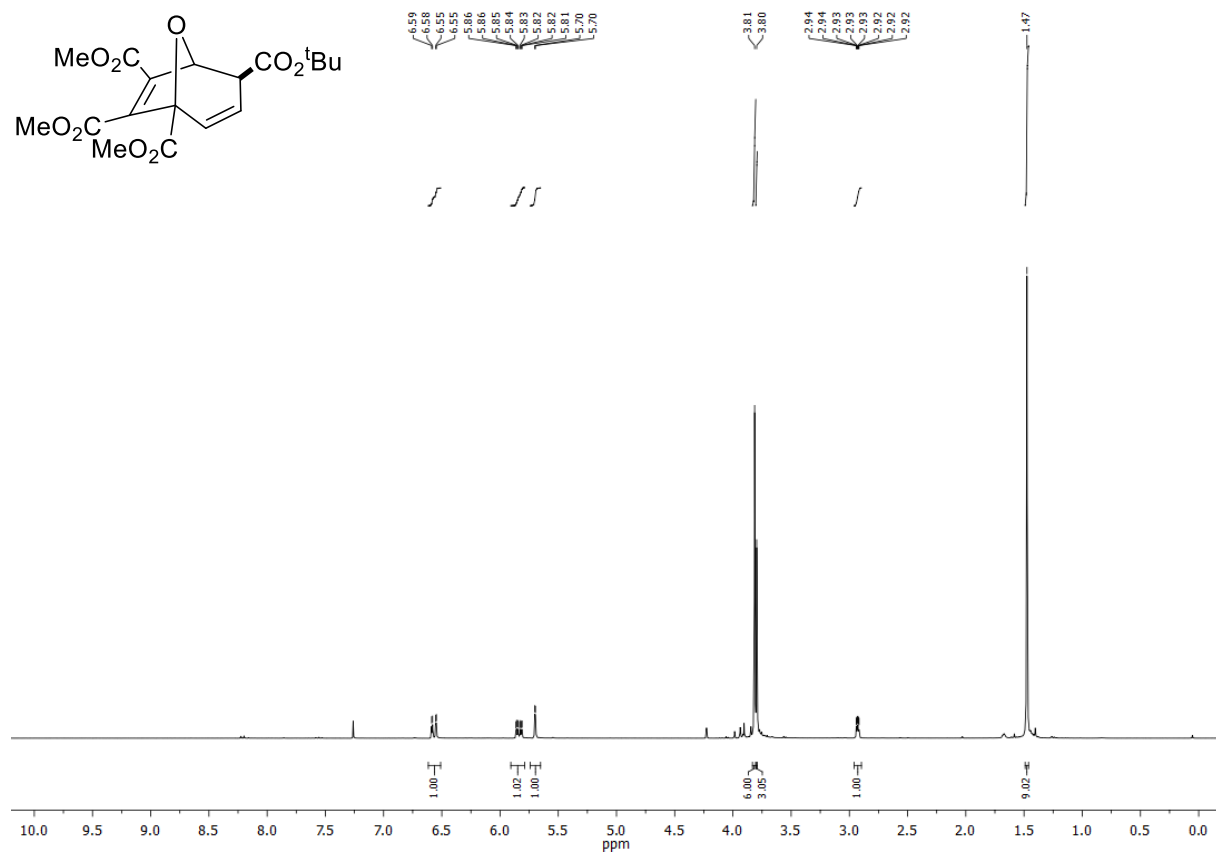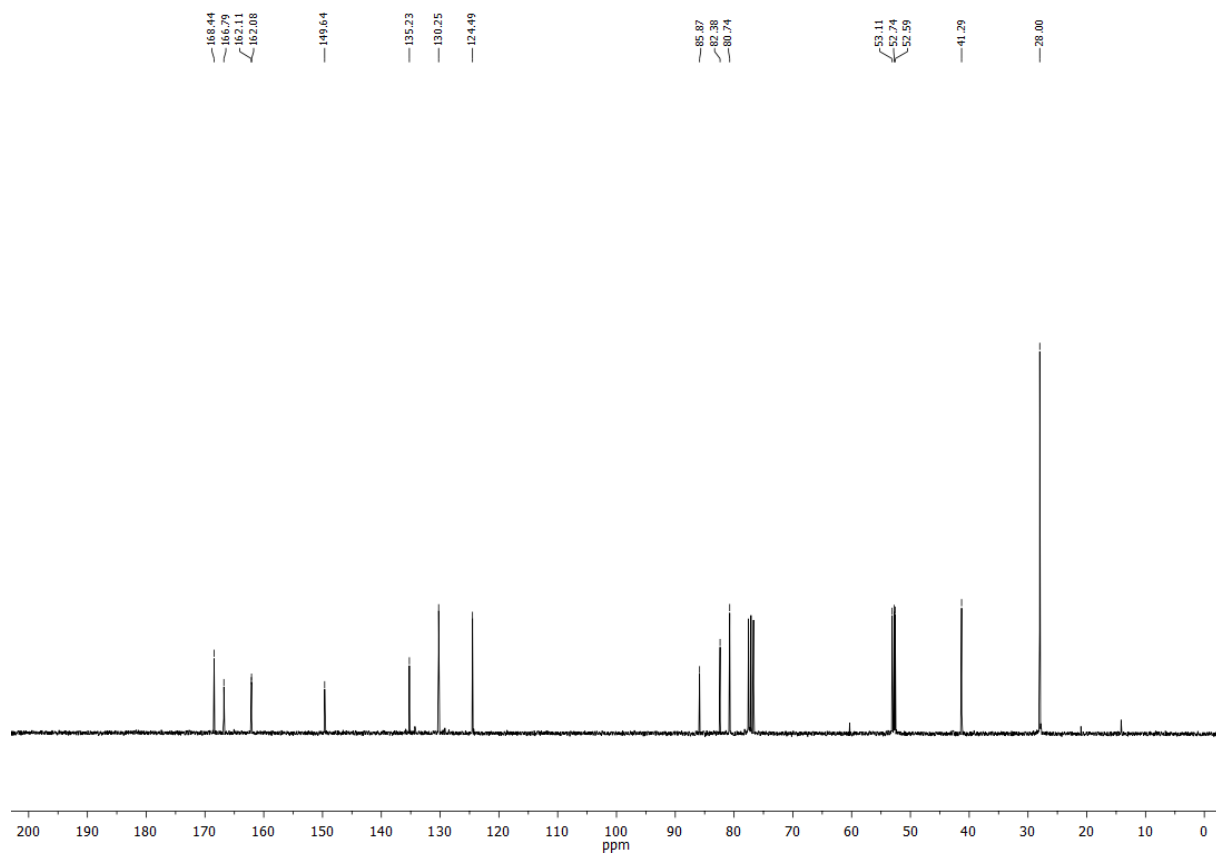

Compound *major 8c*,  $^1\text{H}$  NMR and  $^{13}\text{C}$  NMR ( $\text{CDCl}_3$ ):

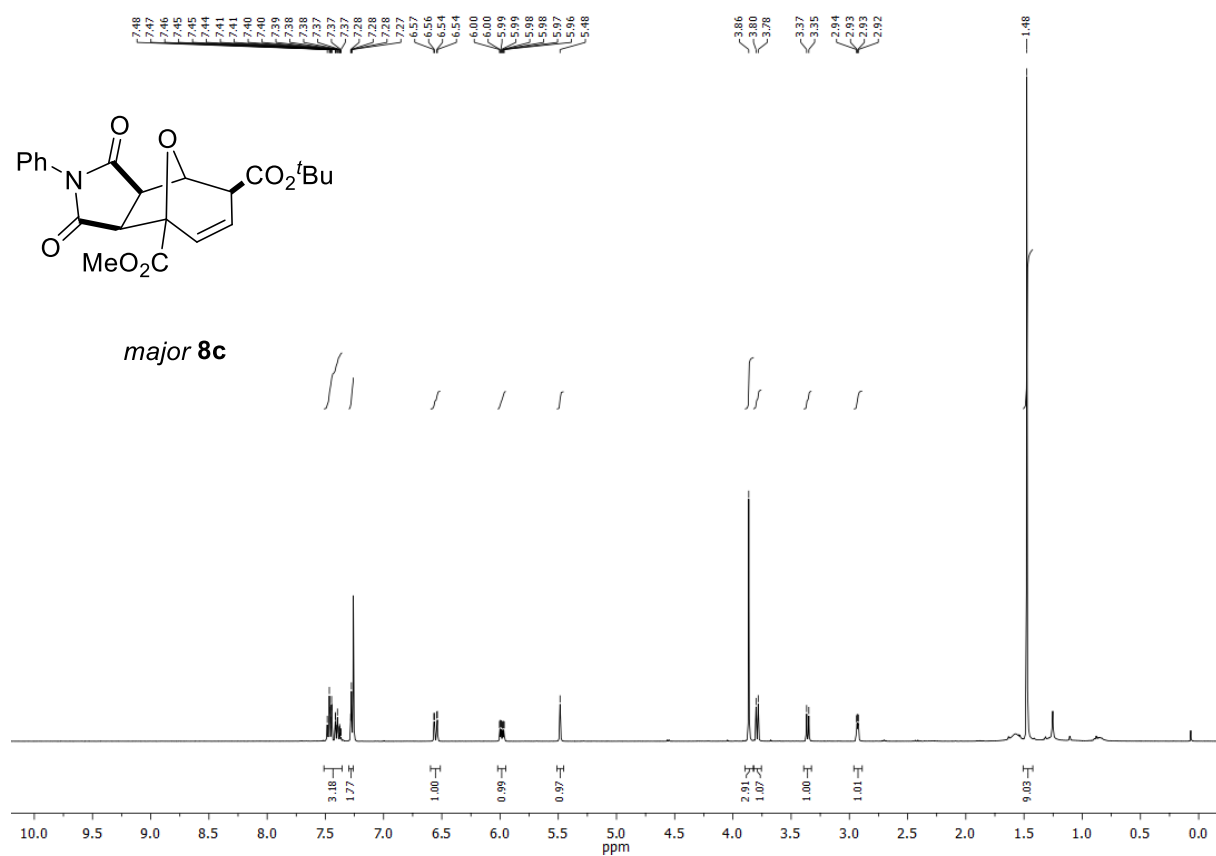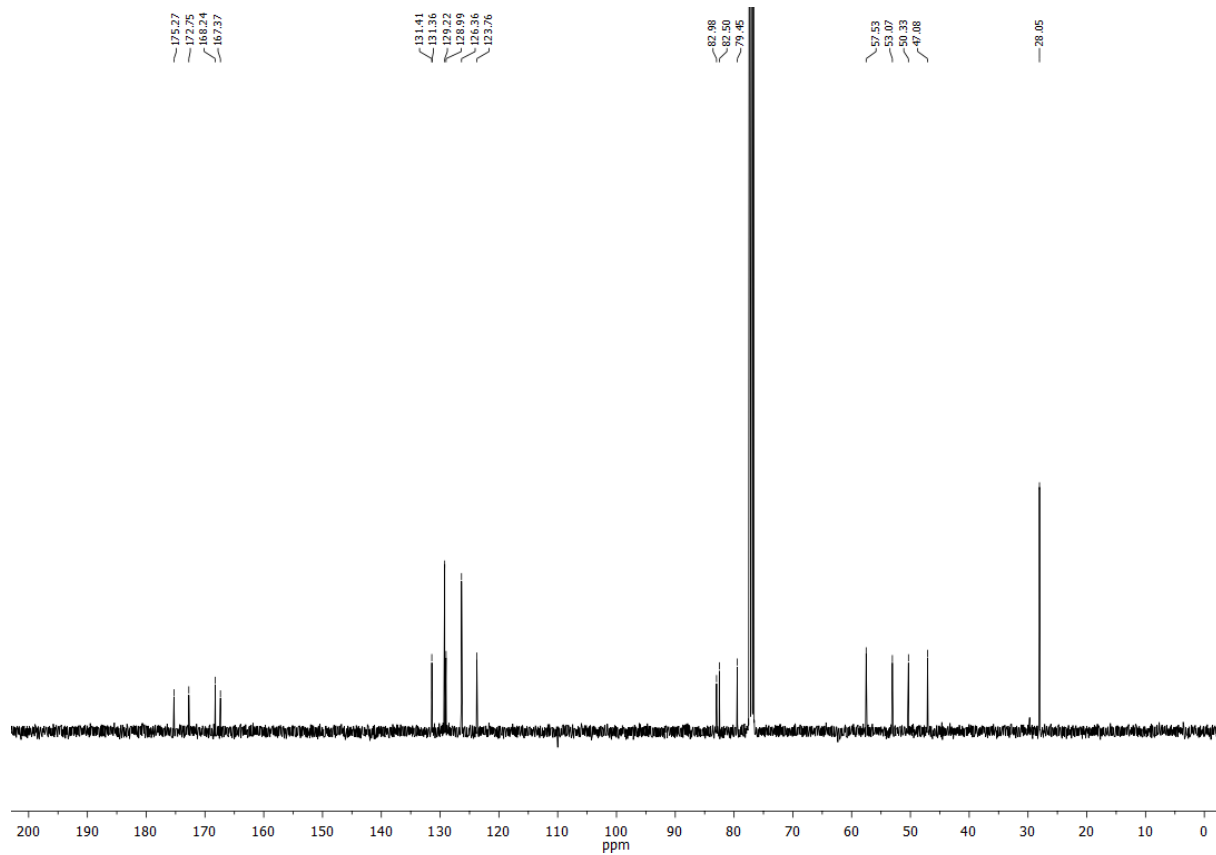

Compound *major 8c* and *minor 8c*,  $^1\text{H}$  NMR and  $^{13}\text{C}$  NMR ( $\text{CDCl}_3$ ):

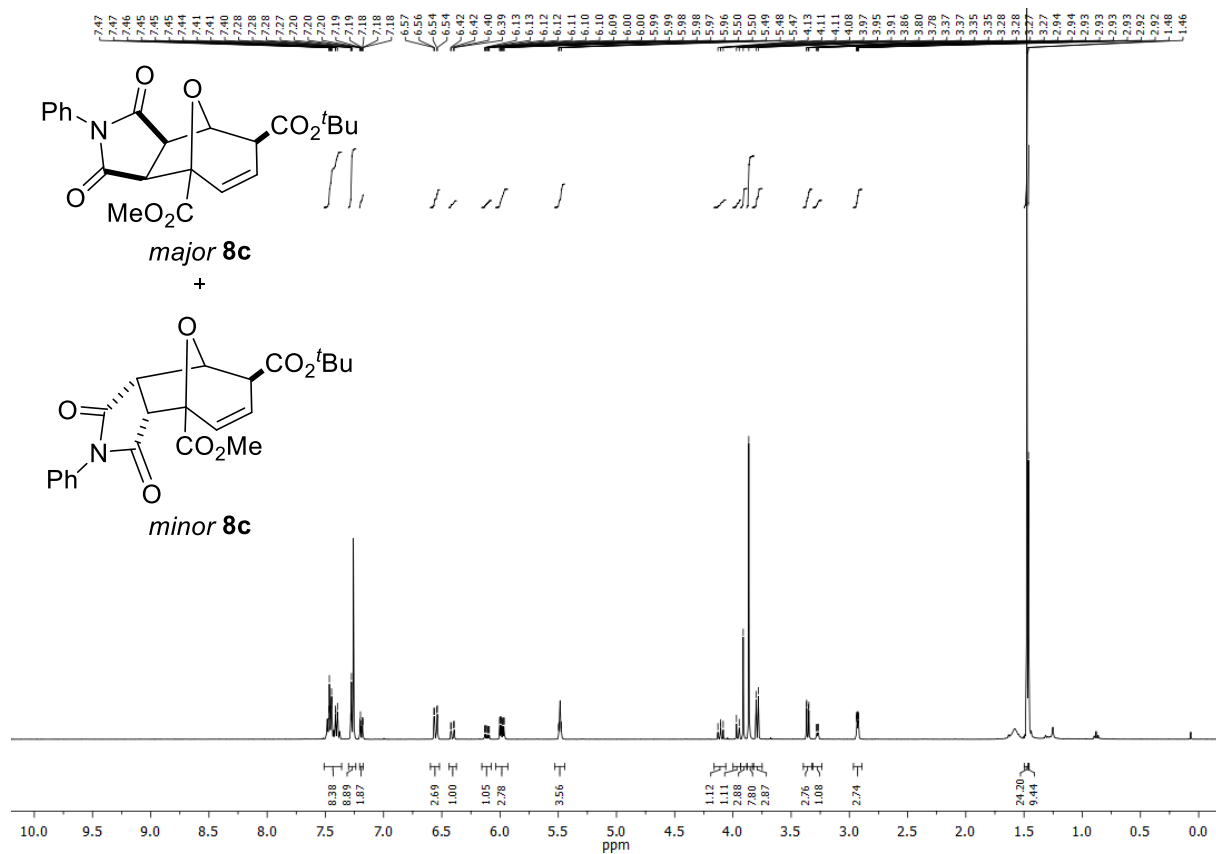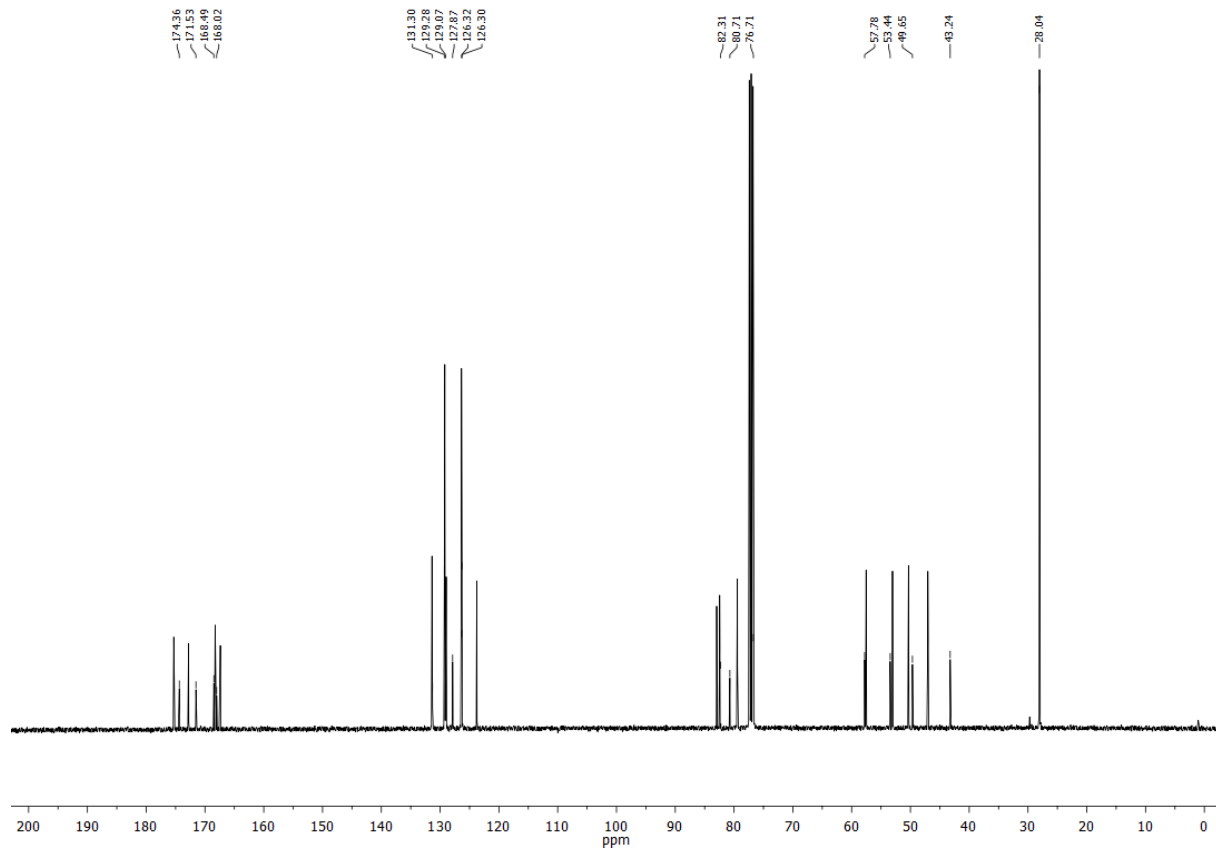

Compound *major* (-)-**8d**,  $^1\text{H}$  NMR and  $^{13}\text{C}$  NMR ( $\text{CDCl}_3$ ):

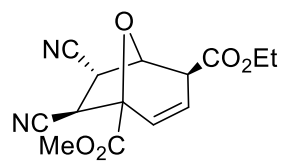

*major* (-)-**8d**

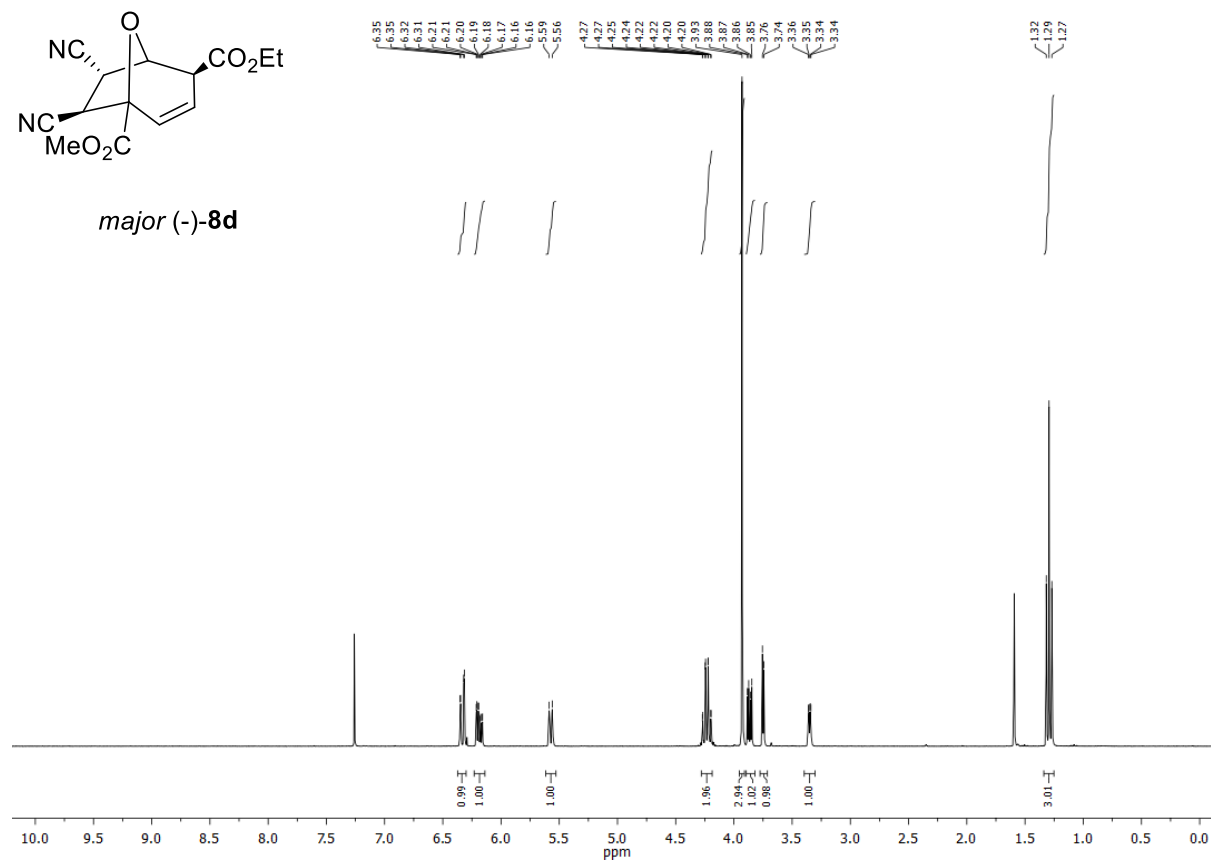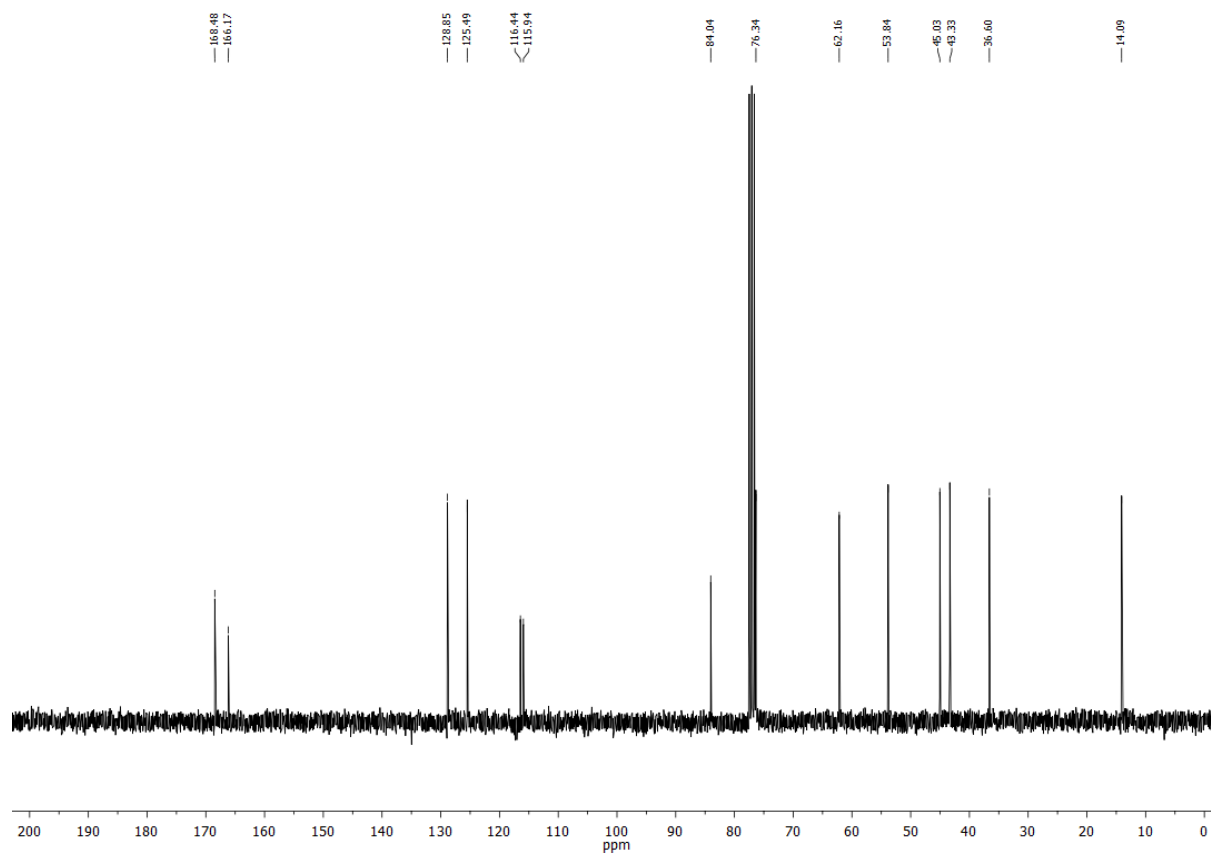



Compound *major* and *minor* **8d**, <sup>1</sup>H NMR and <sup>13</sup>C NMR (CDCl<sub>3</sub>):

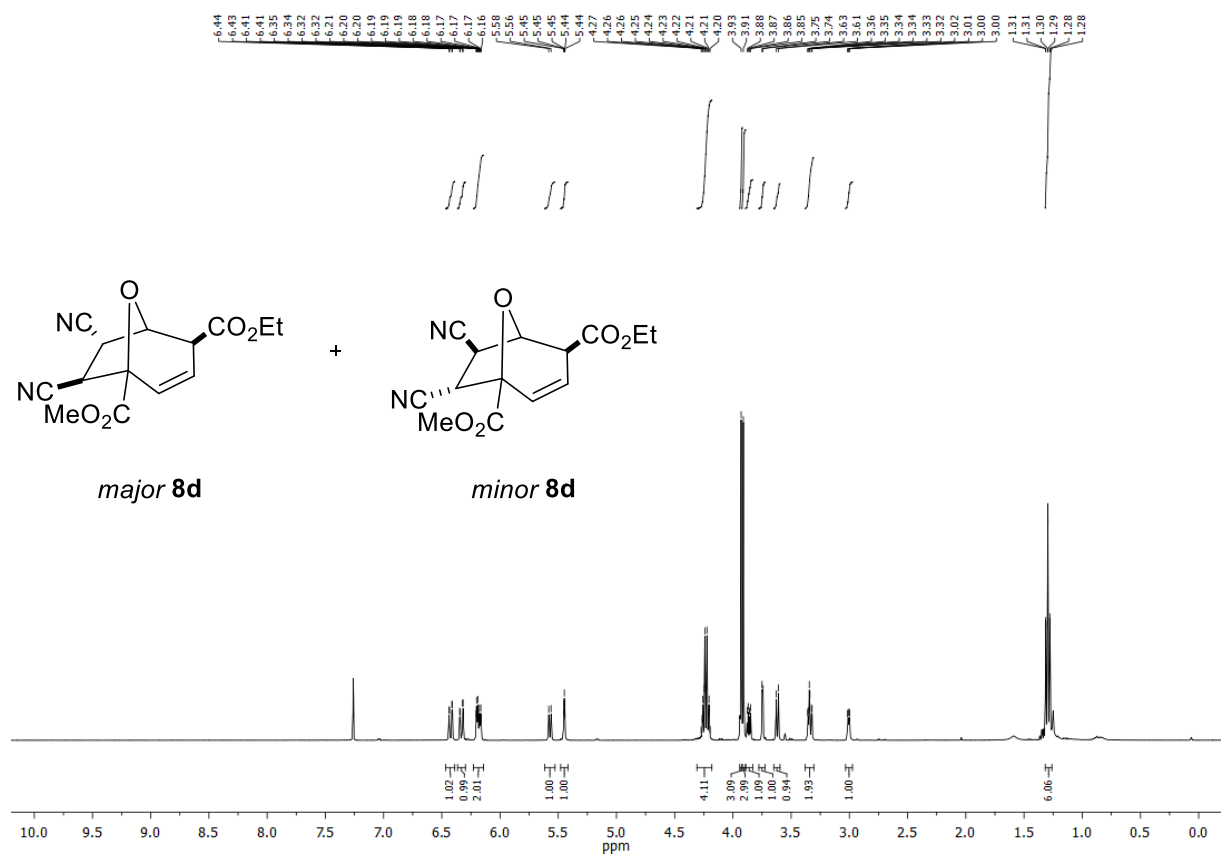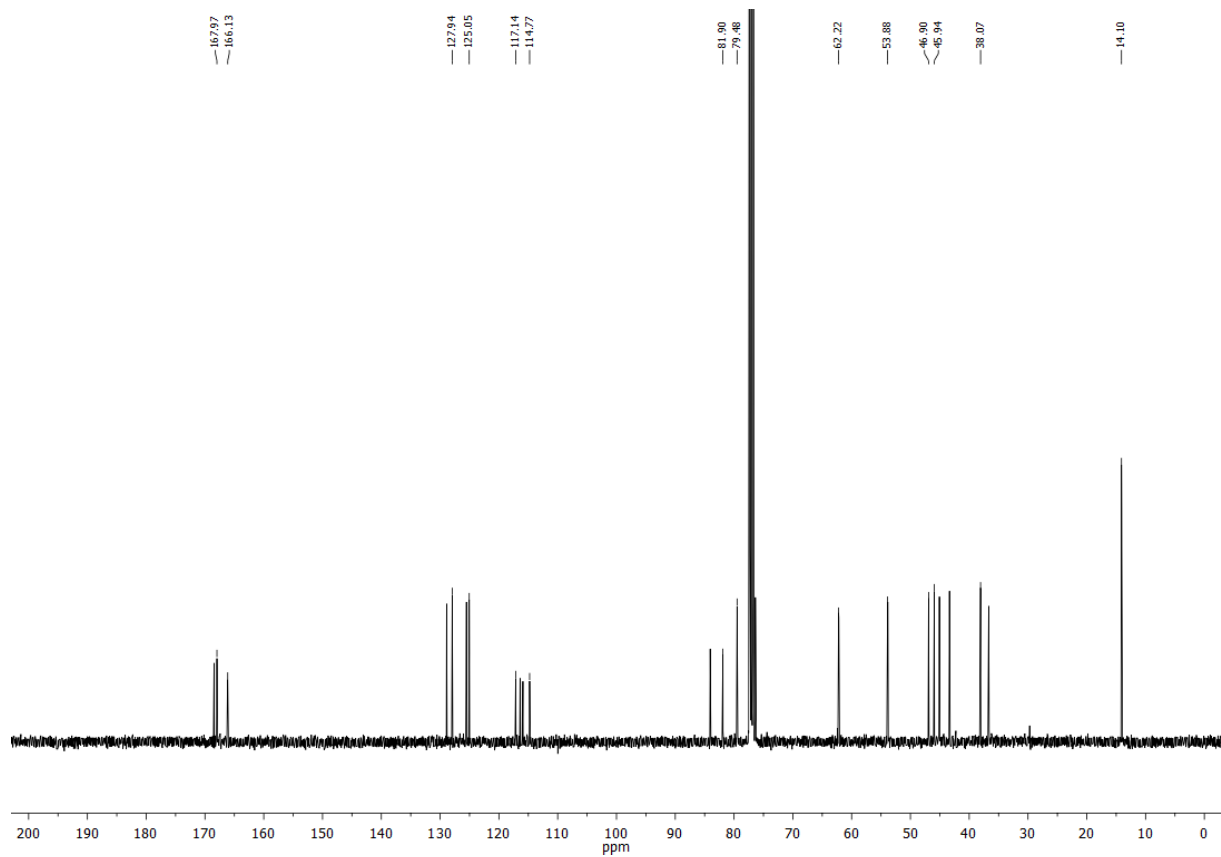

Compound **8e**,  $^1\text{H}$  NMR and  $^{13}\text{C}$  NMR ( $\text{CDCl}_3$ ):

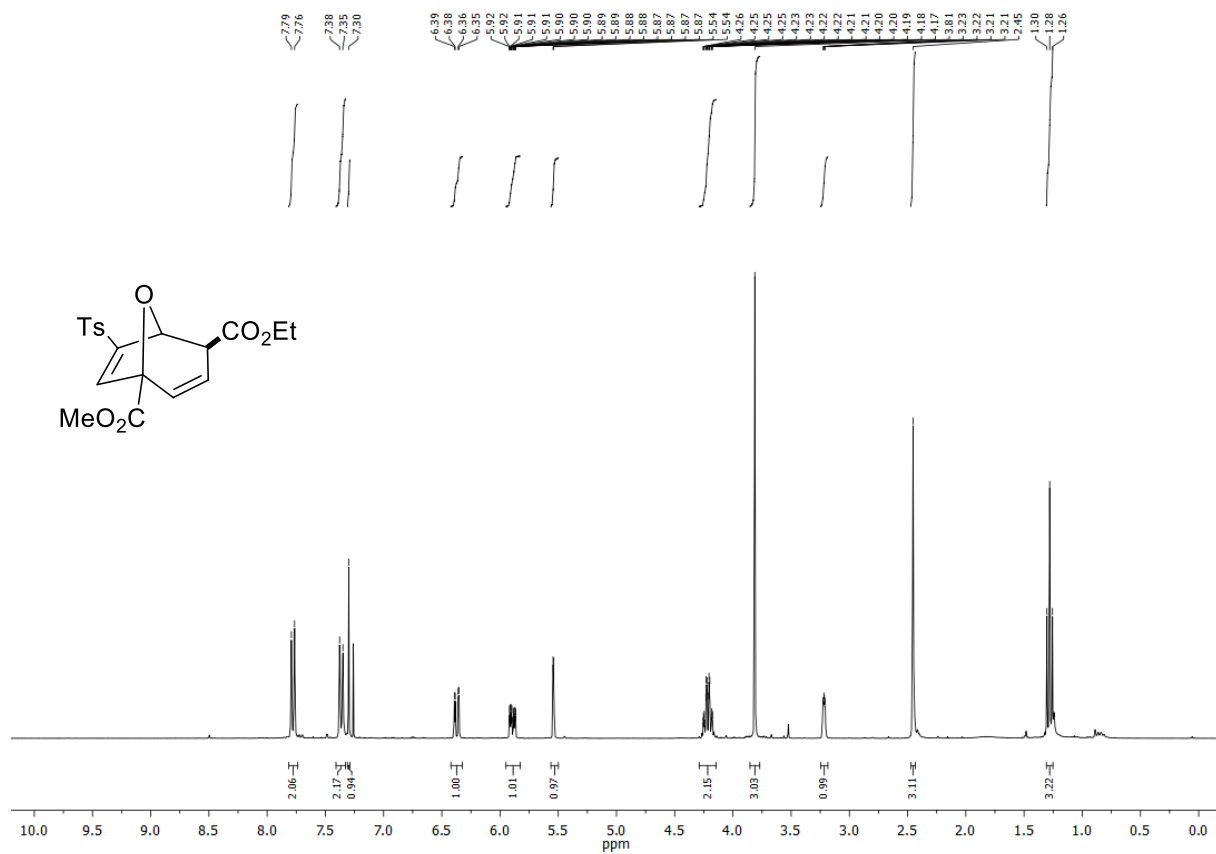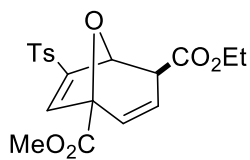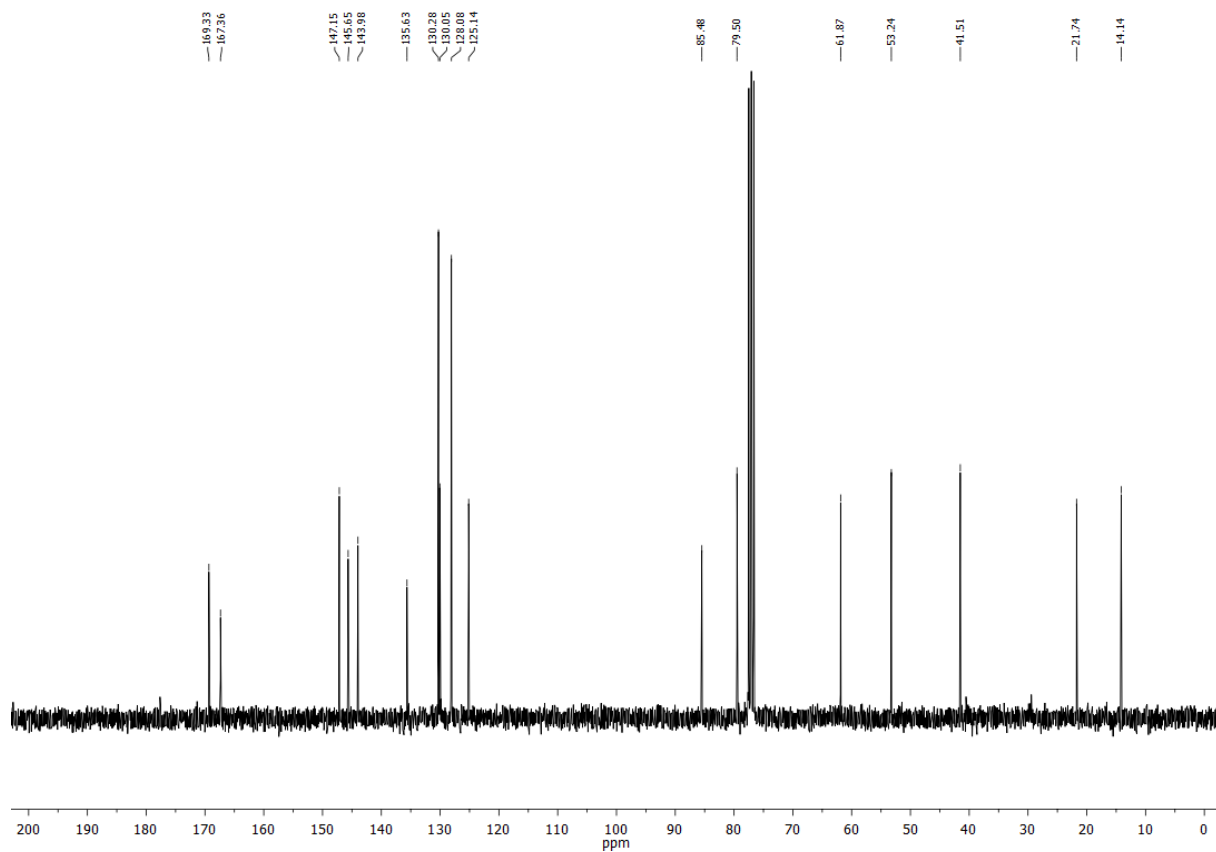

Compound **10**,  $^1\text{H}$  NMR and  $^{13}\text{C}$  NMR ( $\text{CDCl}_3$ ):

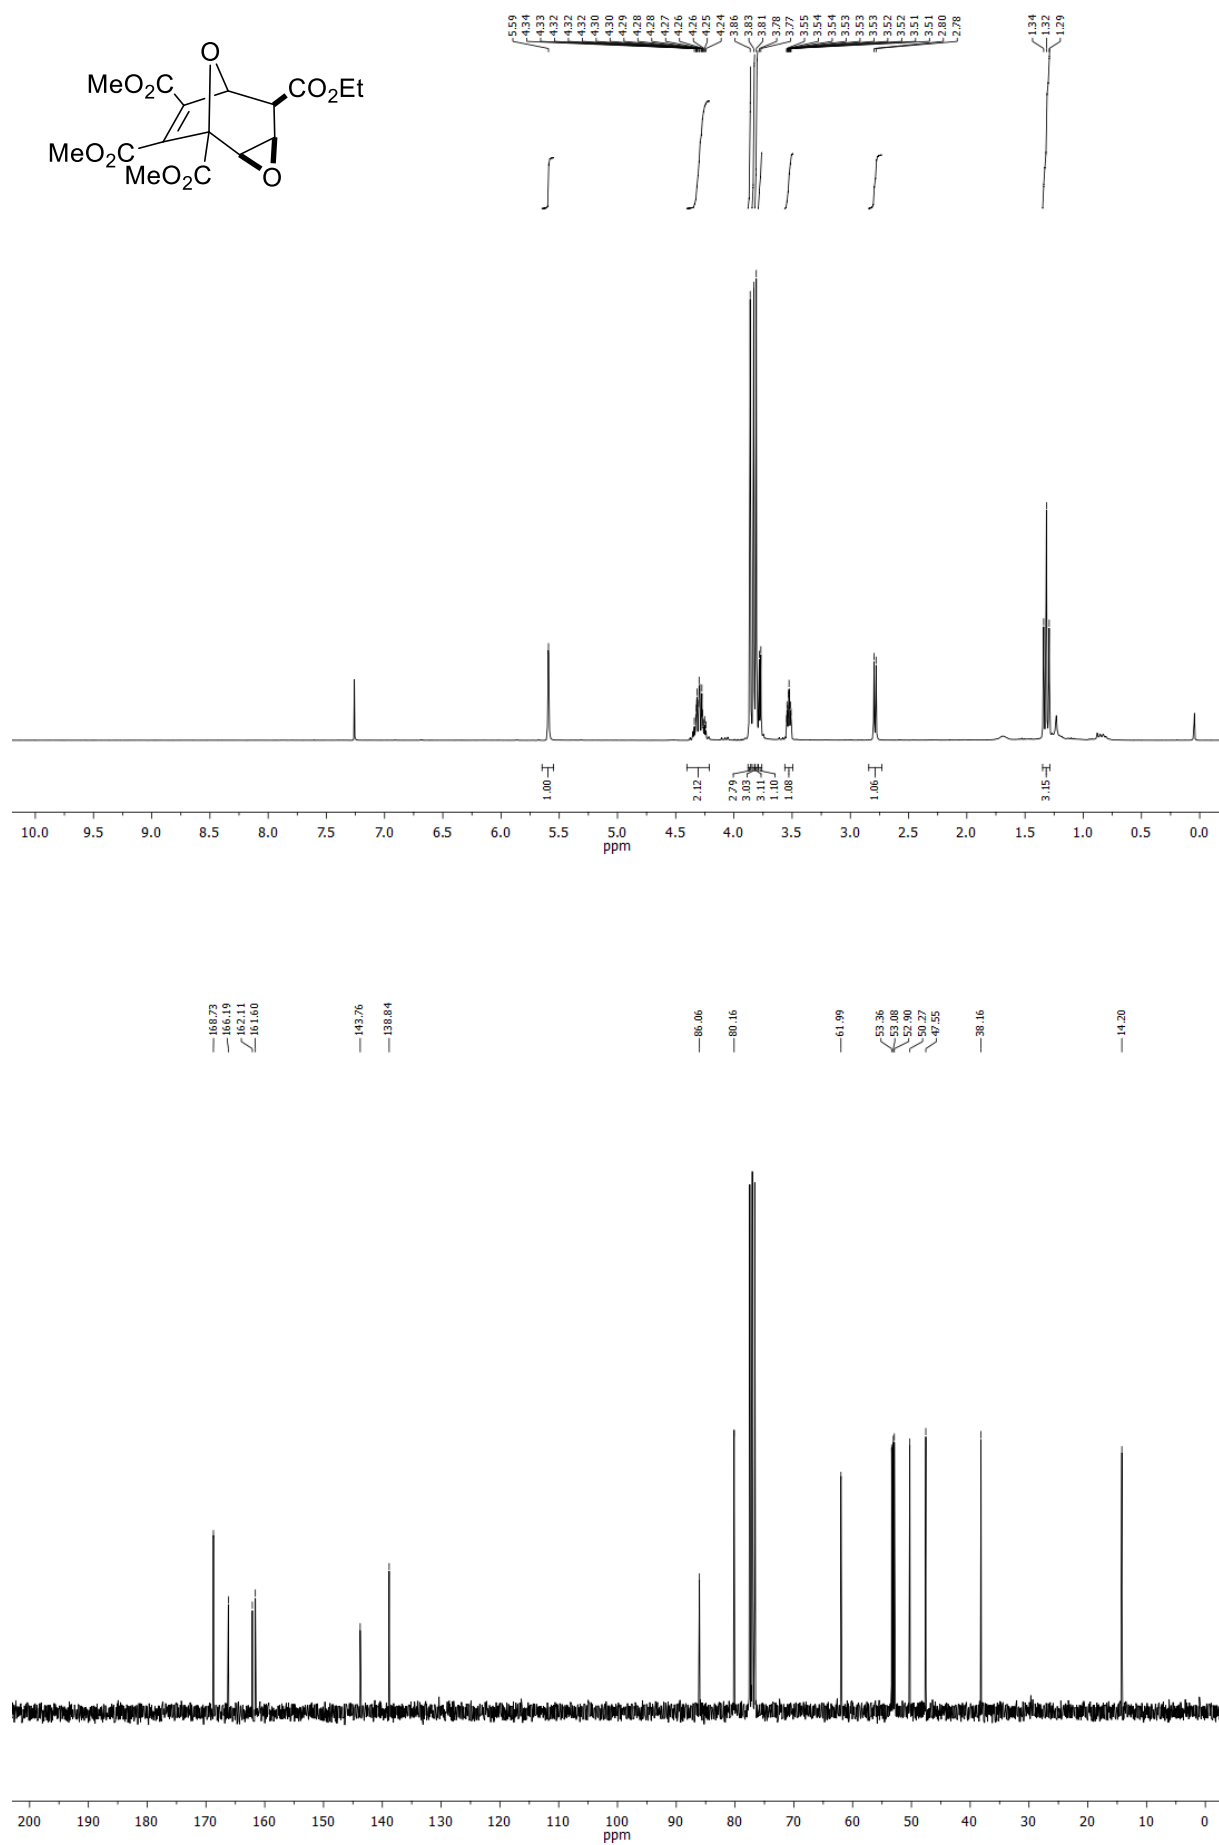

Compound **11**,  $^1\text{H}$  NMR and  $^{13}\text{C}$  NMR ( $\text{CDCl}_3$ ):

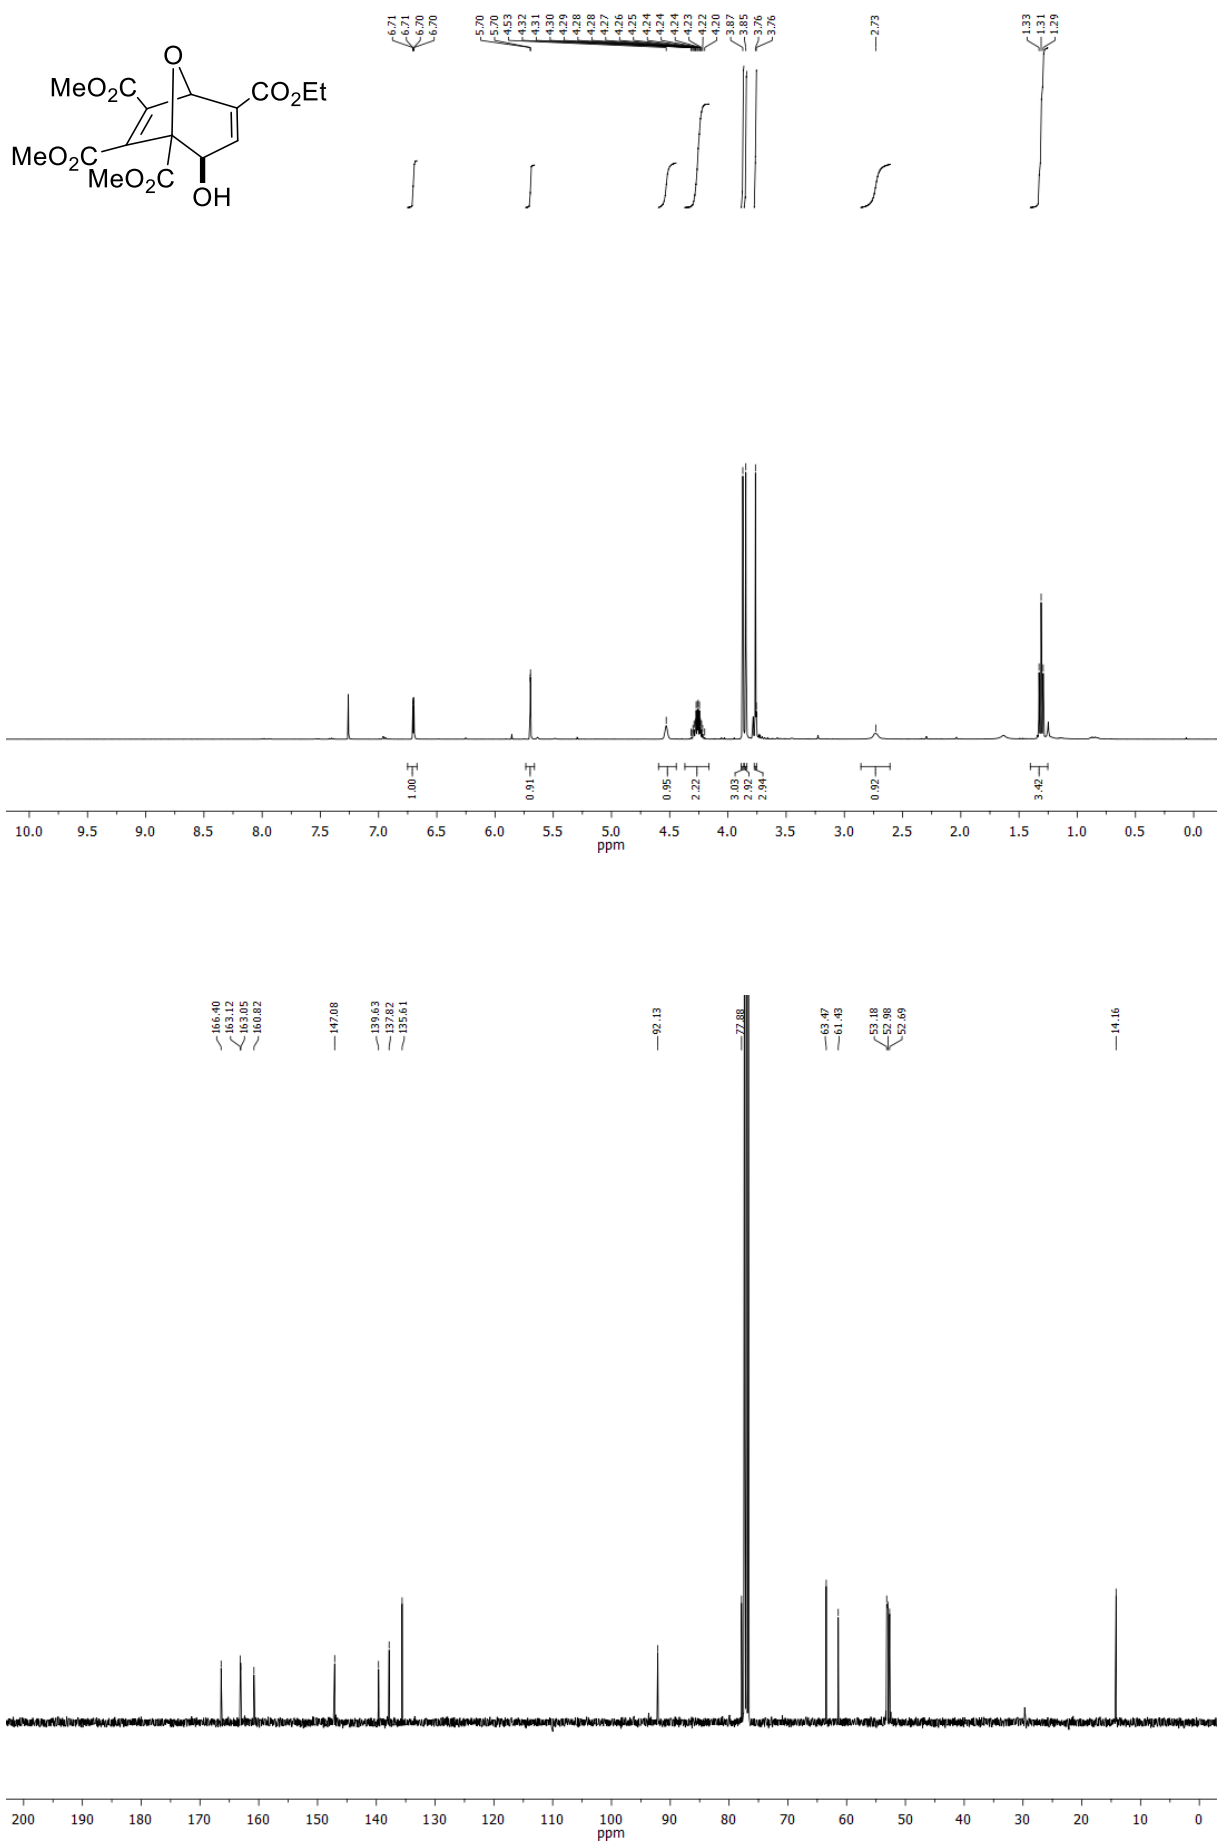

Compound **12**,  $^1\text{H}$  NMR and  $^{13}\text{C}$  NMR ( $\text{CDCl}_3$ ):

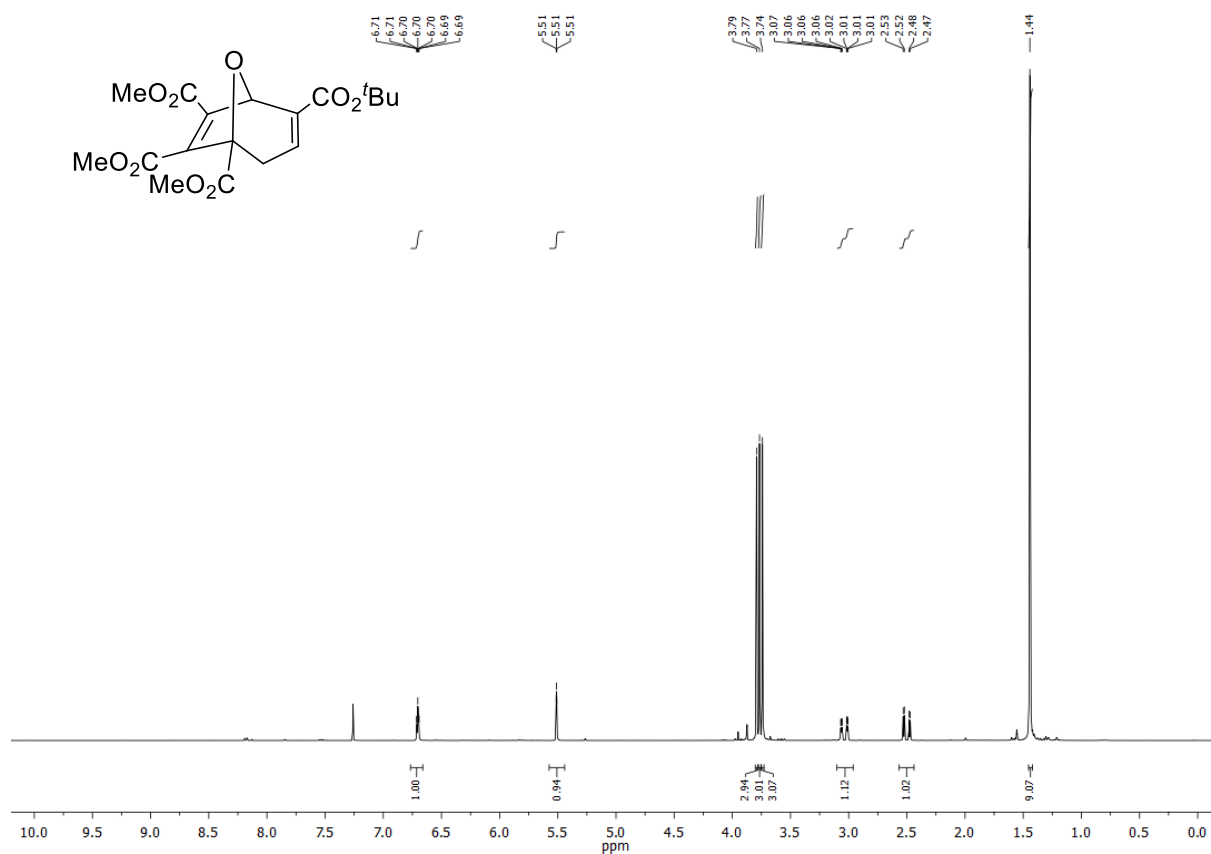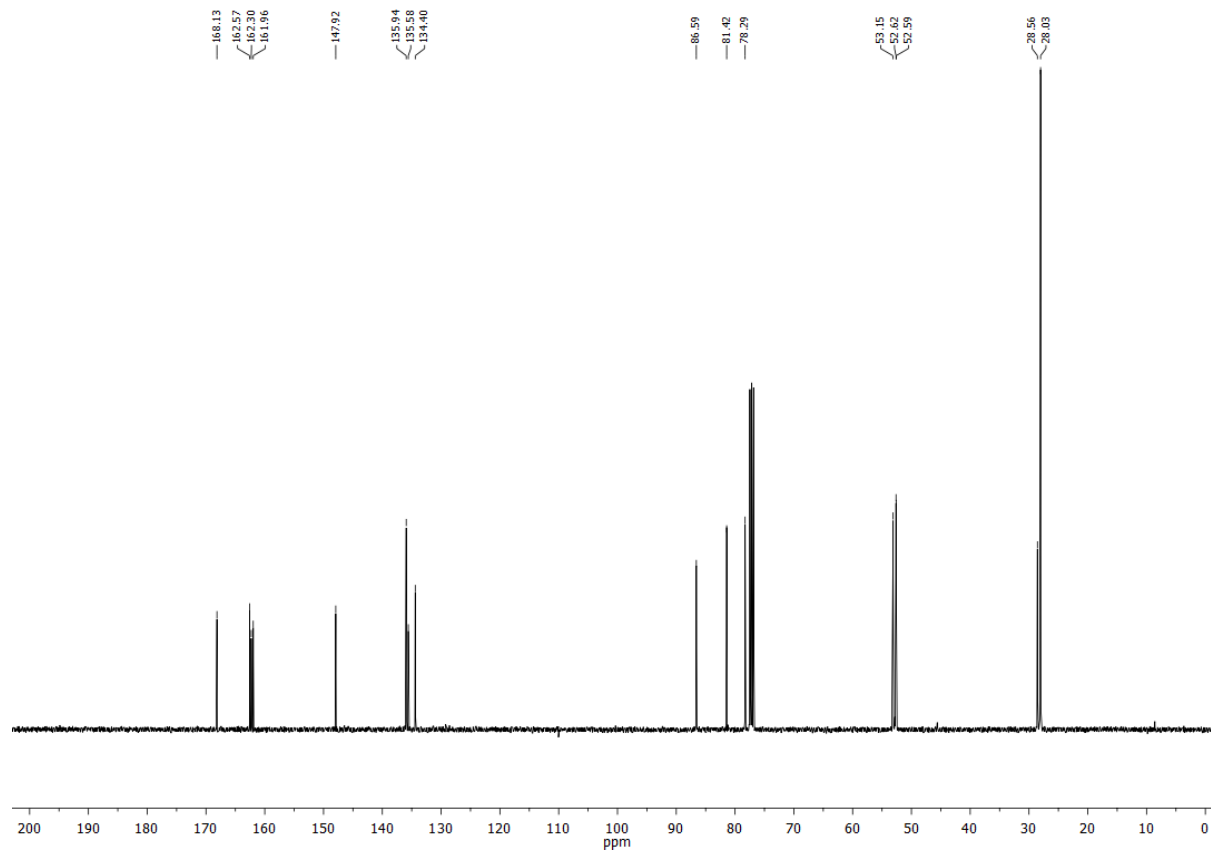

Compound **13**,  $^1\text{H}$  NMR and  $^{13}\text{C}$  NMR ( $\text{CDCl}_3$ ):

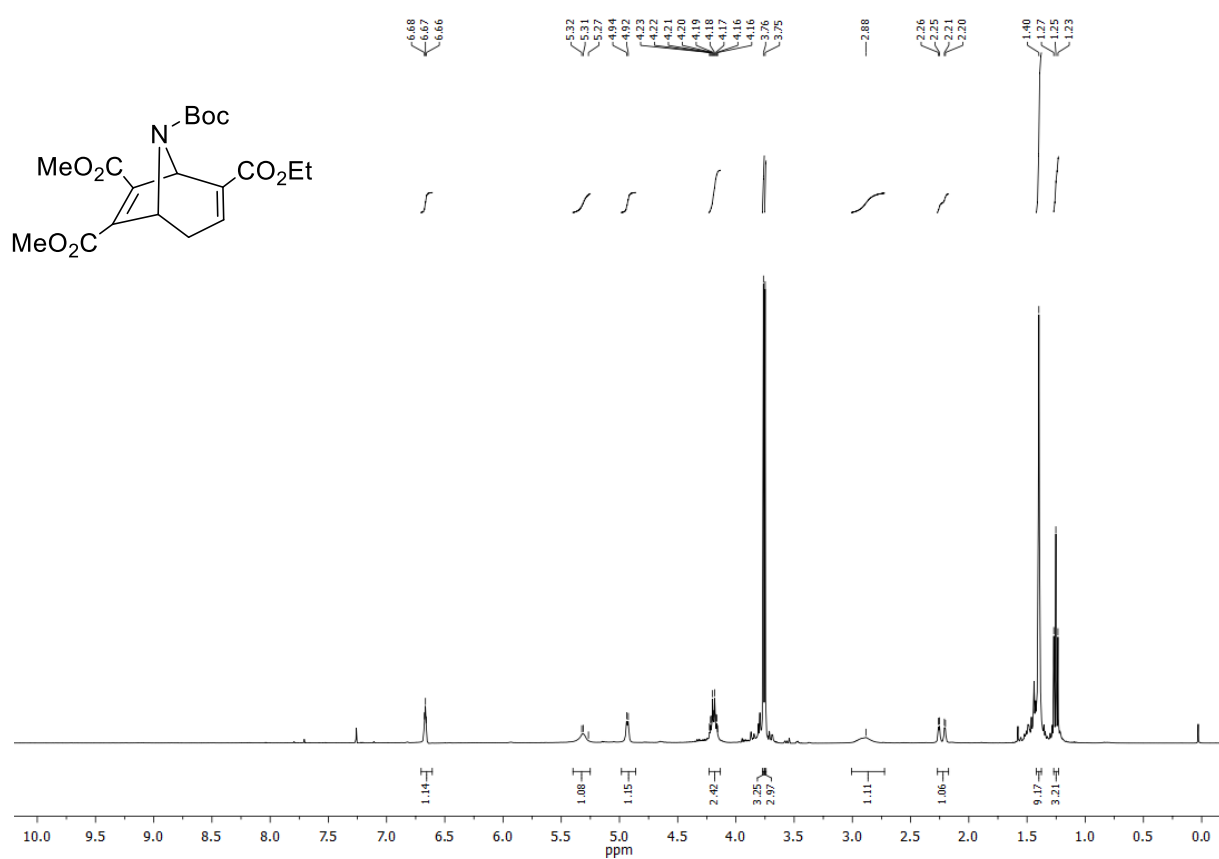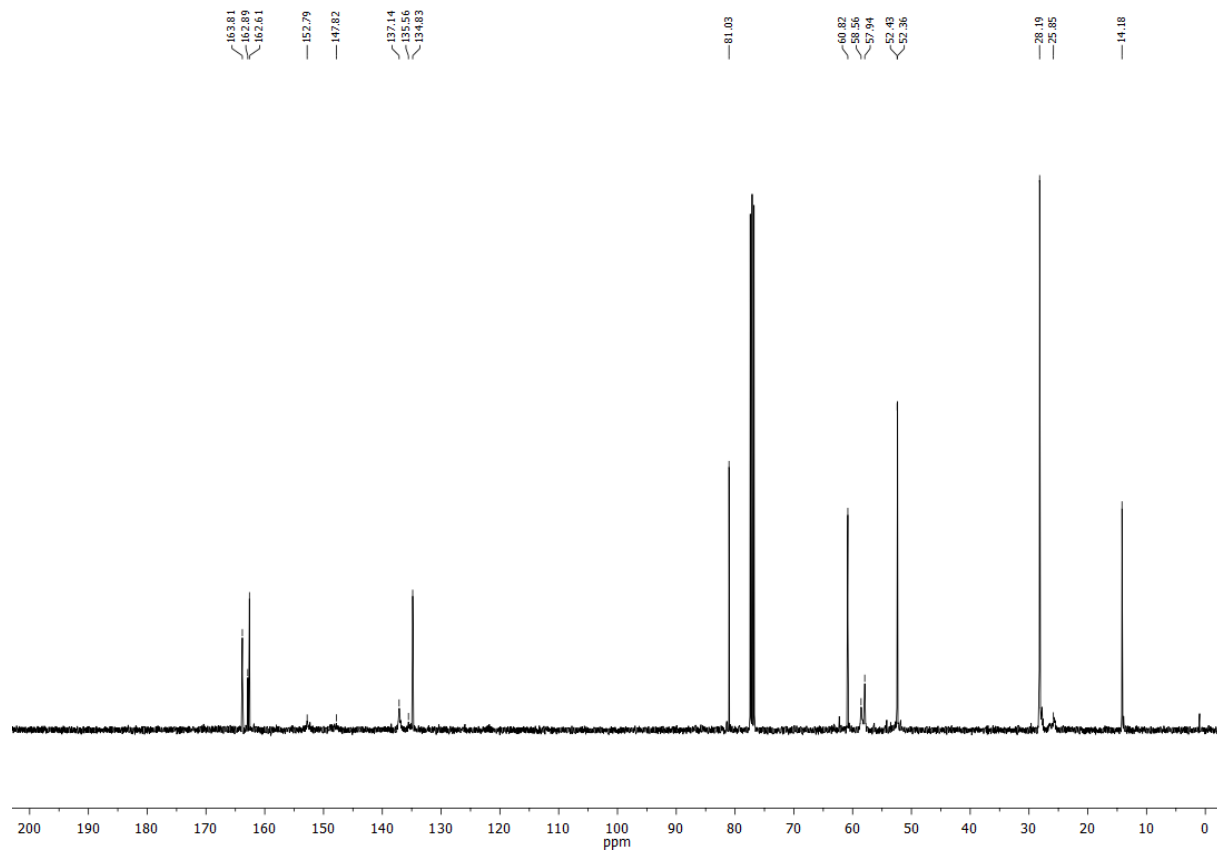

Compound **14**,  $^1\text{H}$  NMR and  $^{13}\text{C}$  NMR ( $\text{CDCl}_3$ ):

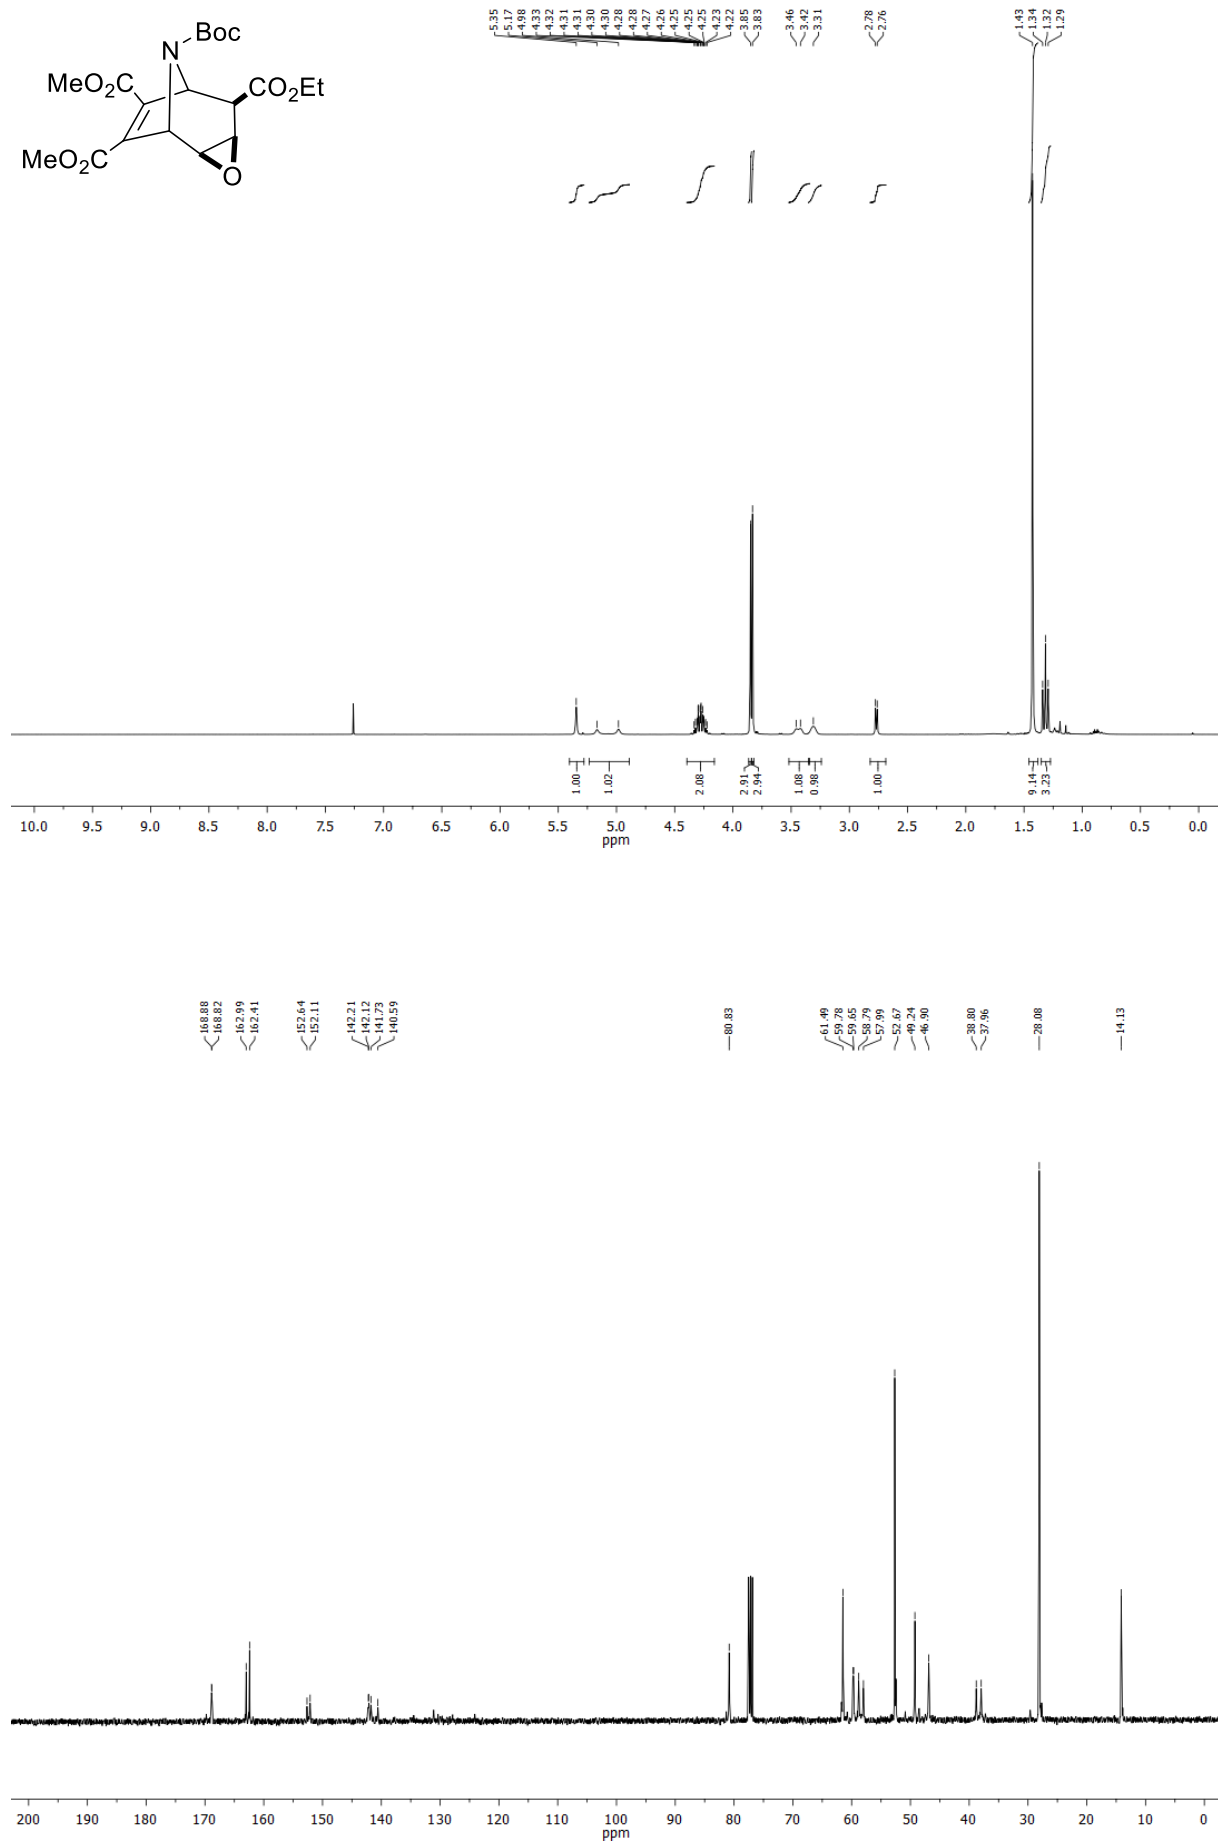

Compound **15**,  $^1\text{H}$  NMR and  $^{13}\text{C}$  NMR ( $\text{CDCl}_3$ ):

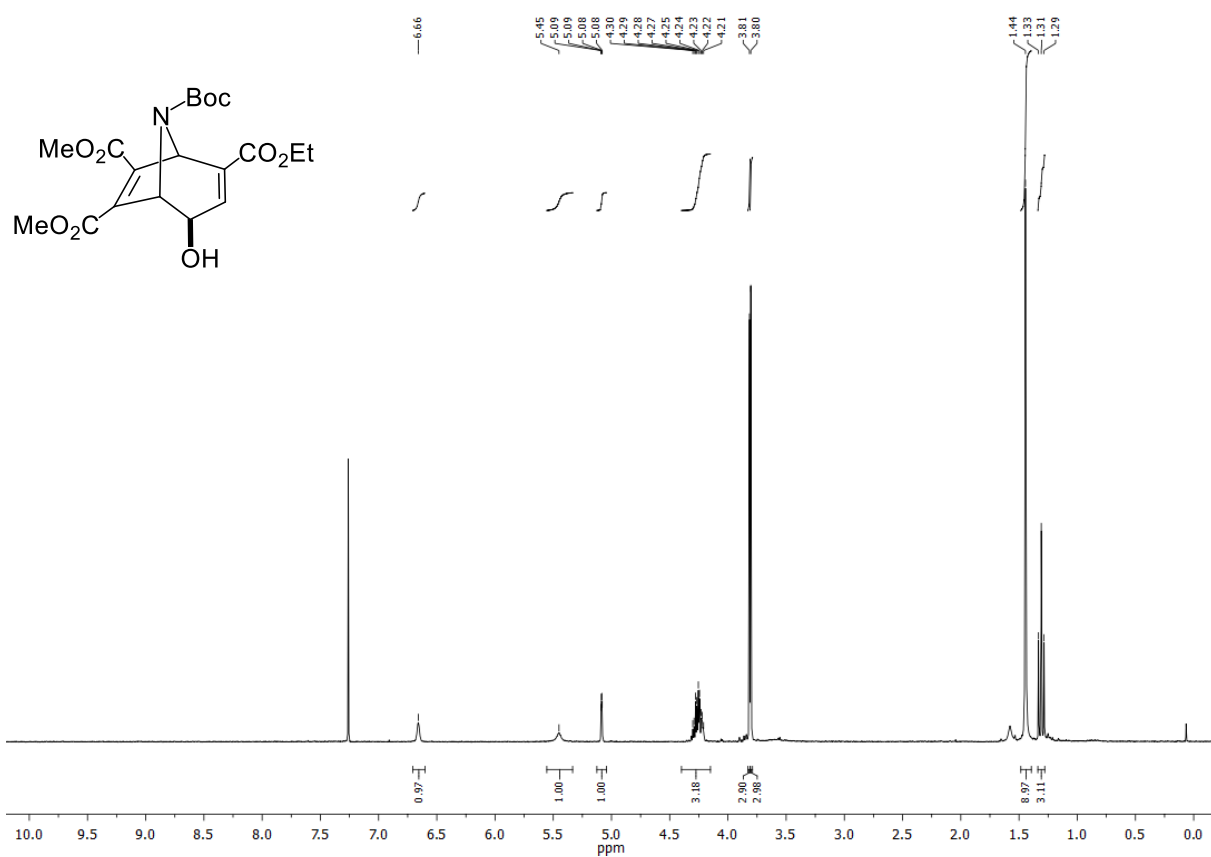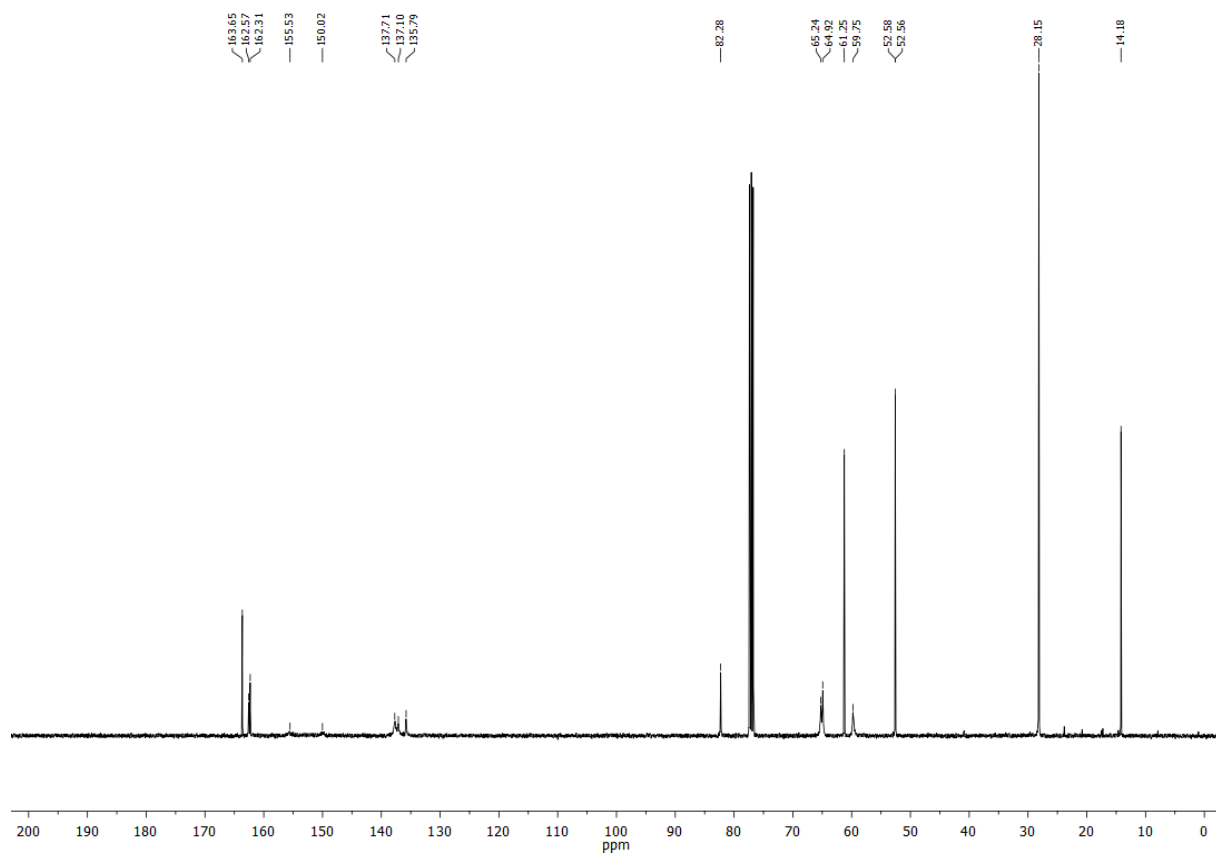



Compound **16**,  $^1\text{H}$  NMR and  $^{13}\text{C}$  NMR ( $\text{CDCl}_3$ ):

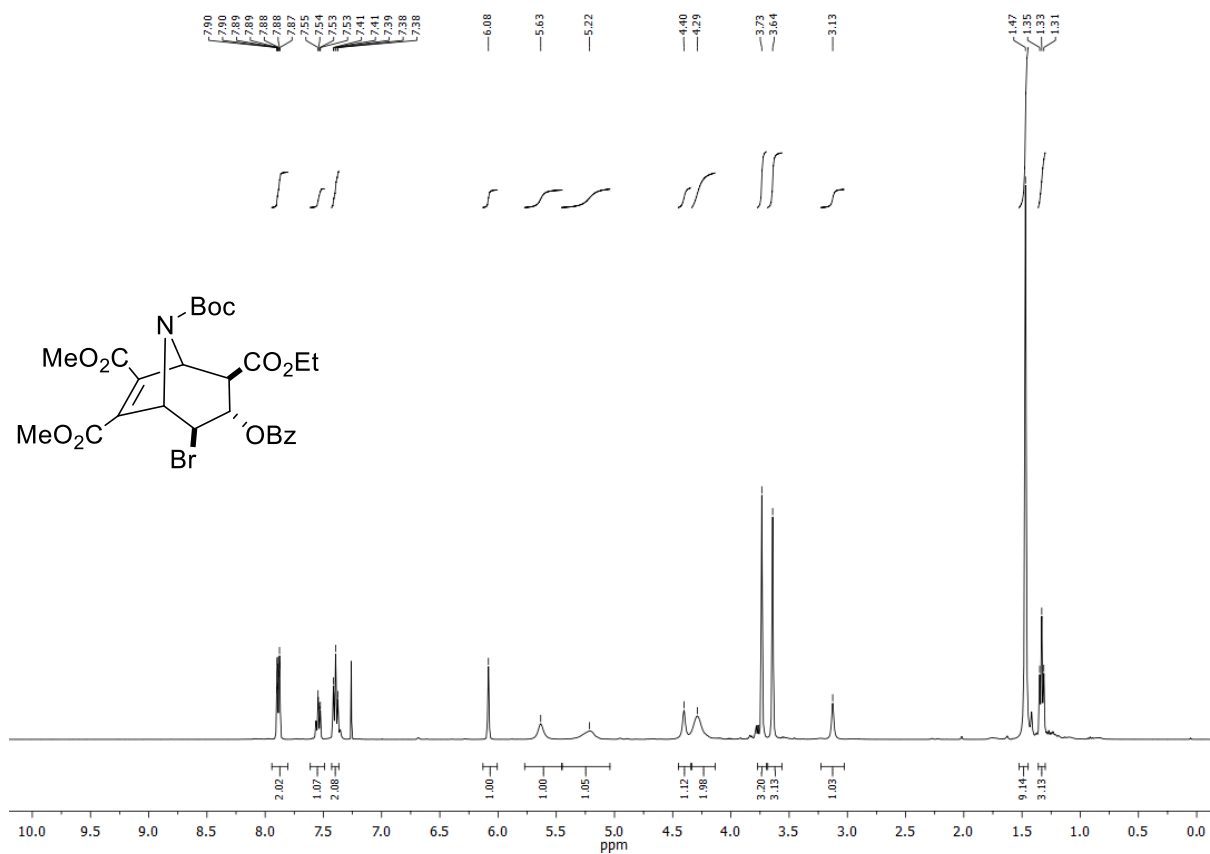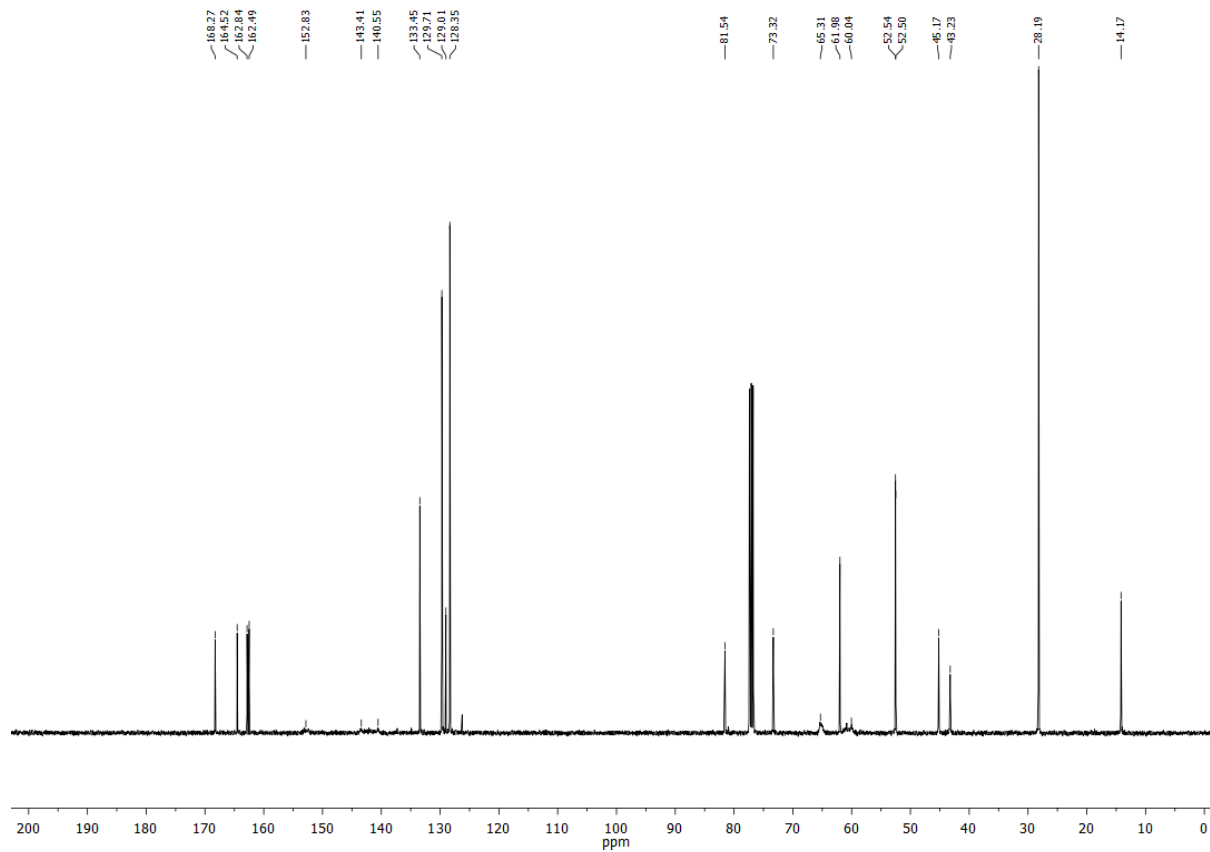



Compound **18**,  $^1\text{H}$  NMR and  $^{13}\text{C}$  NMR ( $\text{CDCl}_3$ ):

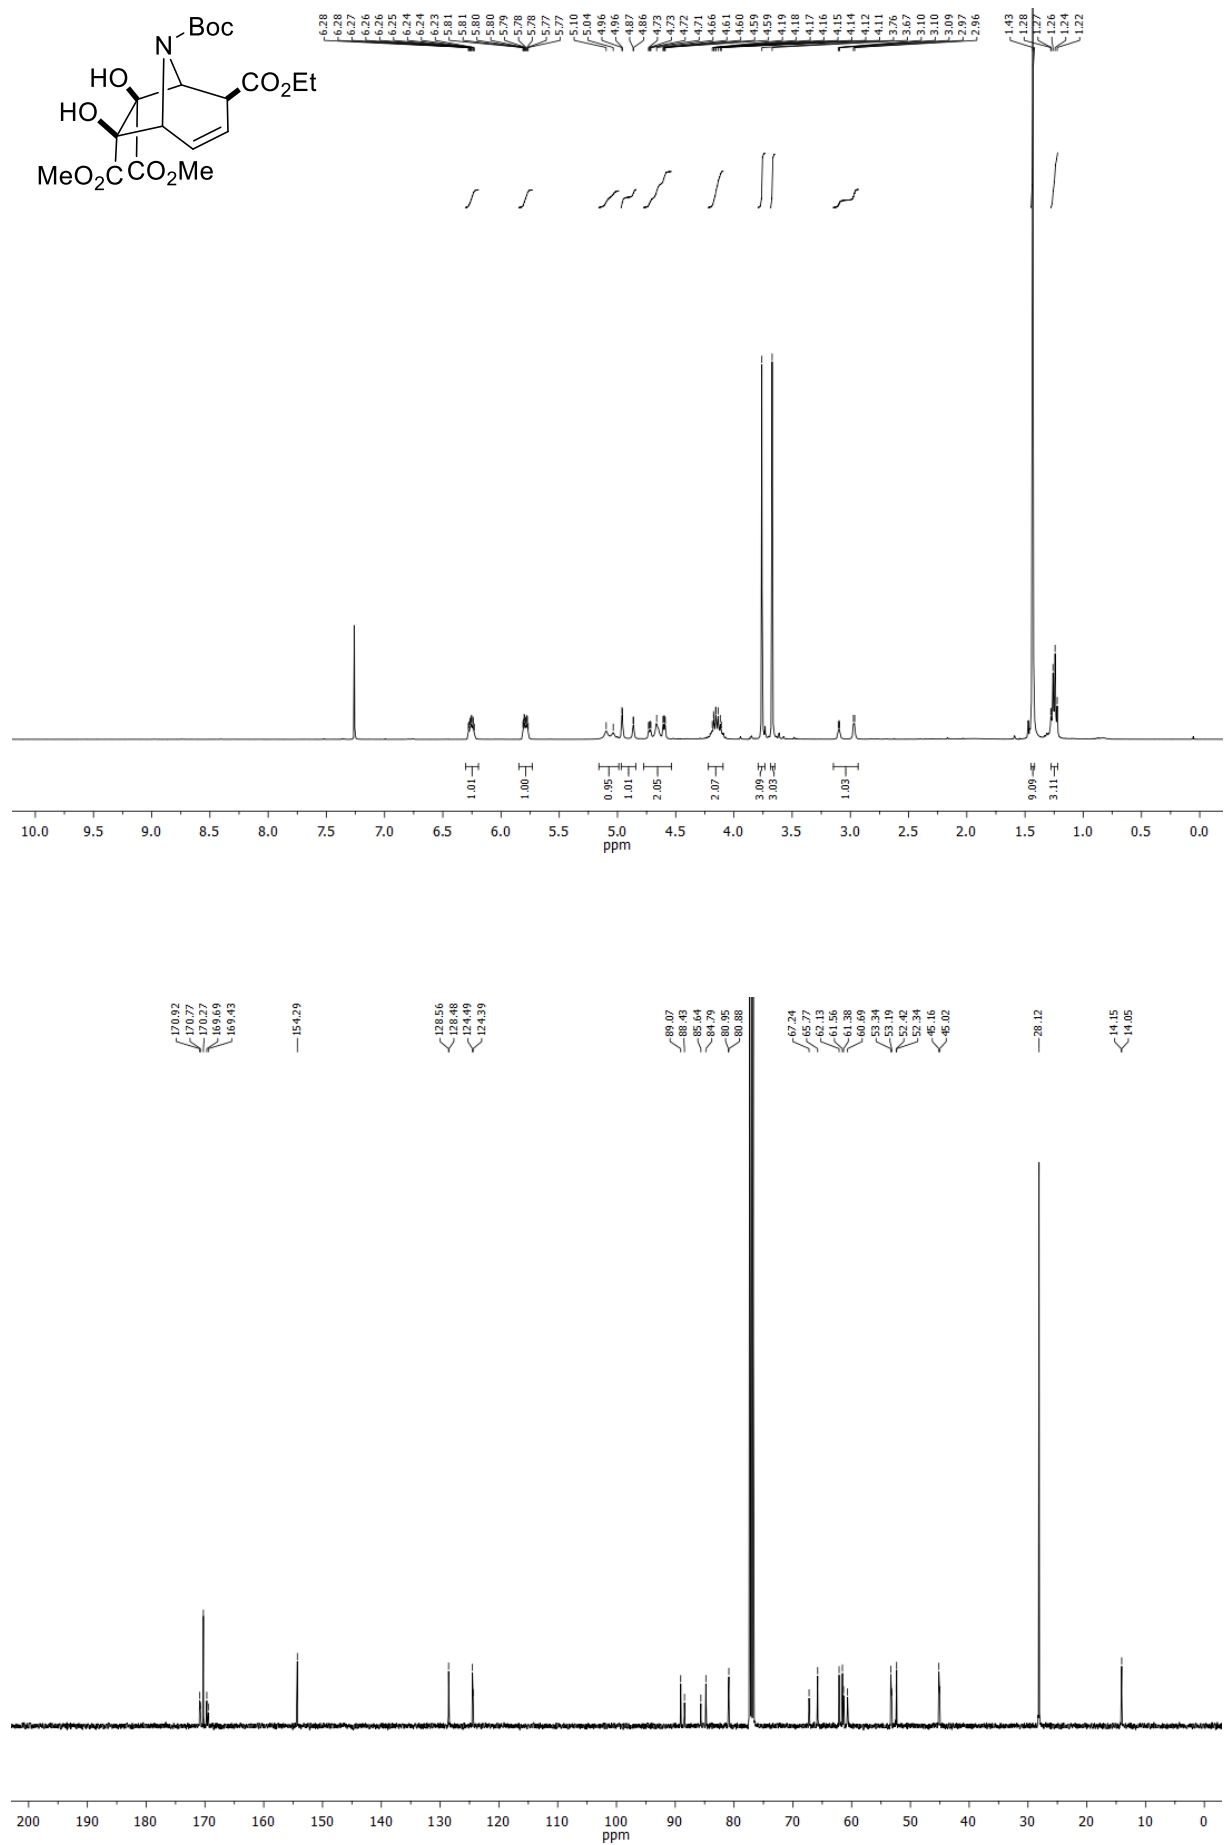

Compound **19**,  $^1\text{H}$  NMR and  $^{13}\text{C}$  NMR ( $\text{CDCl}_3$ ):

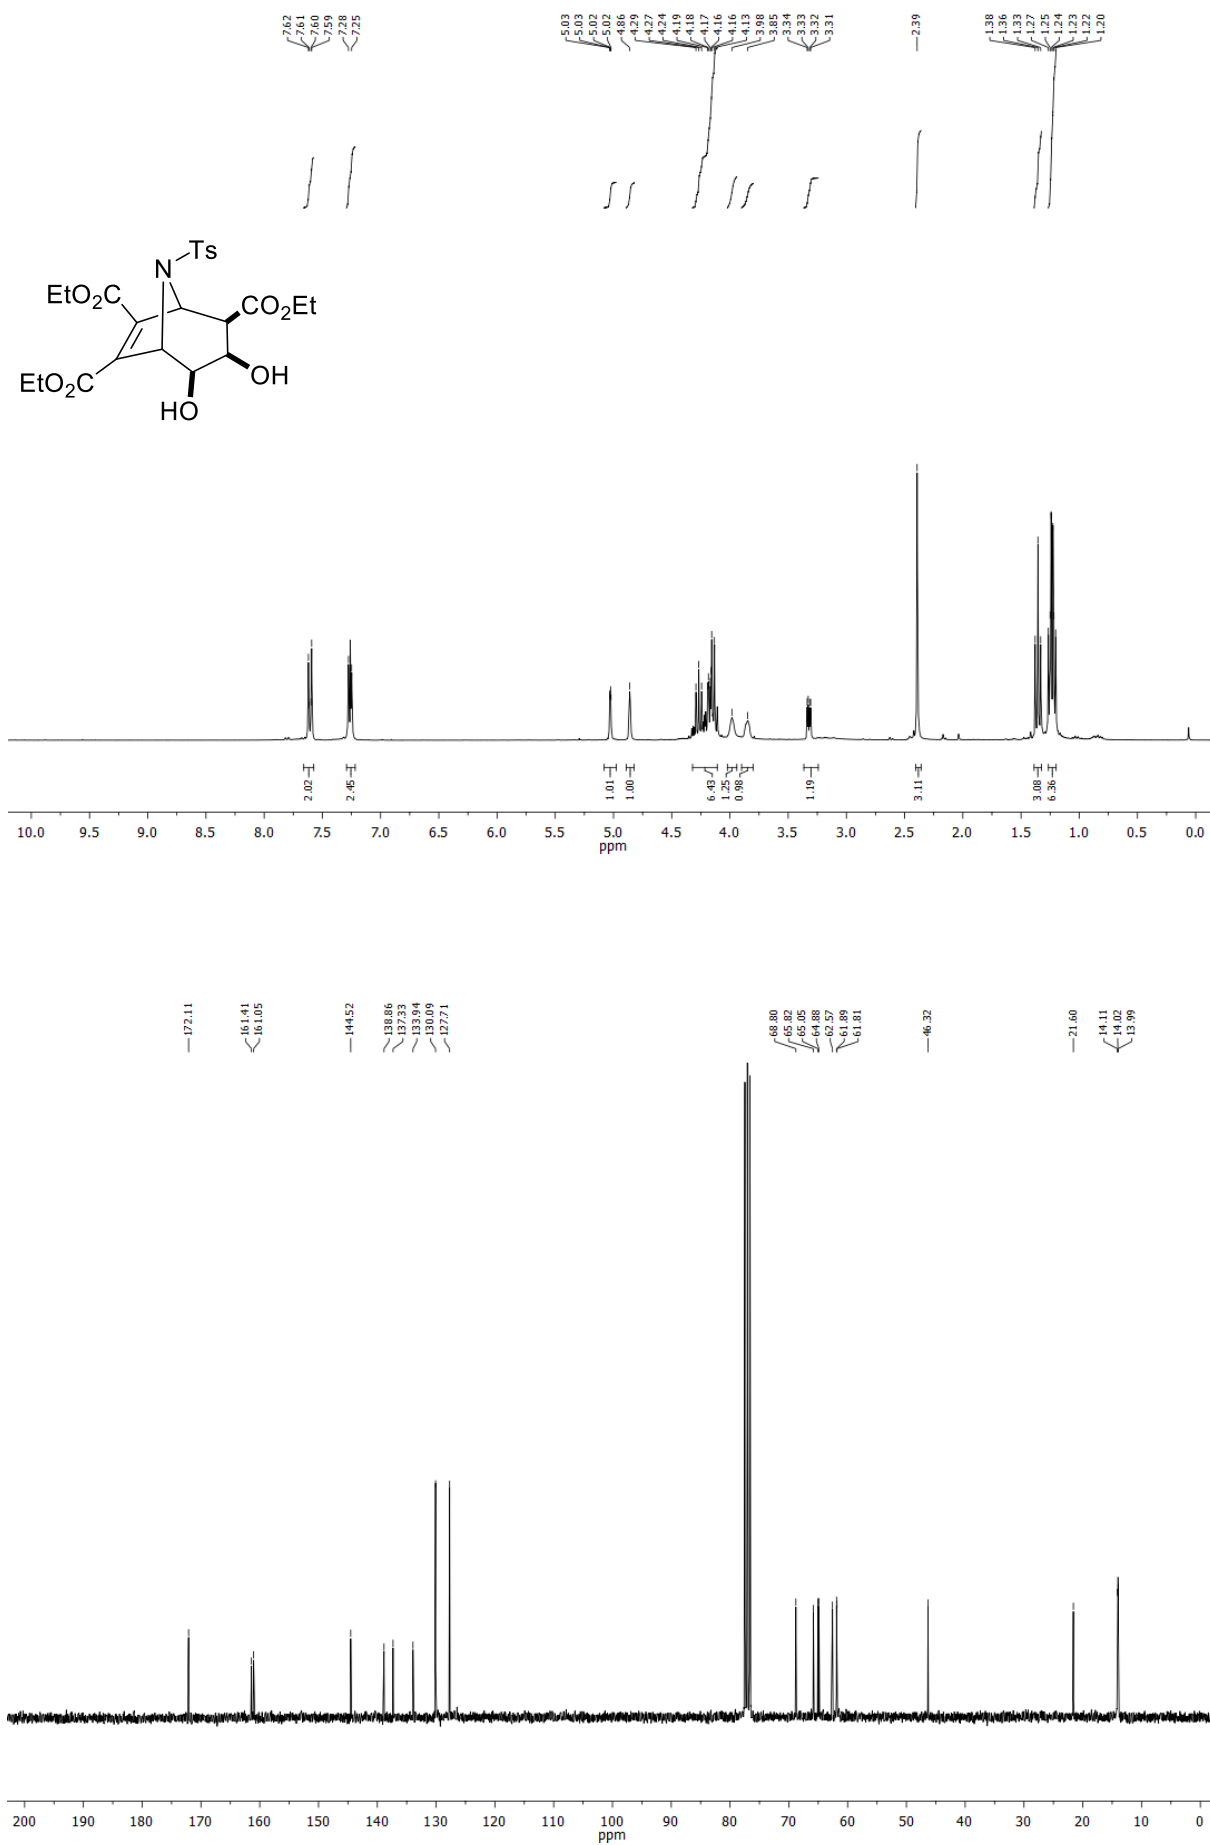

Compound **20**,  $^1\text{H}$  NMR and  $^{13}\text{C}$  NMR ( $\text{CDCl}_3$ ):

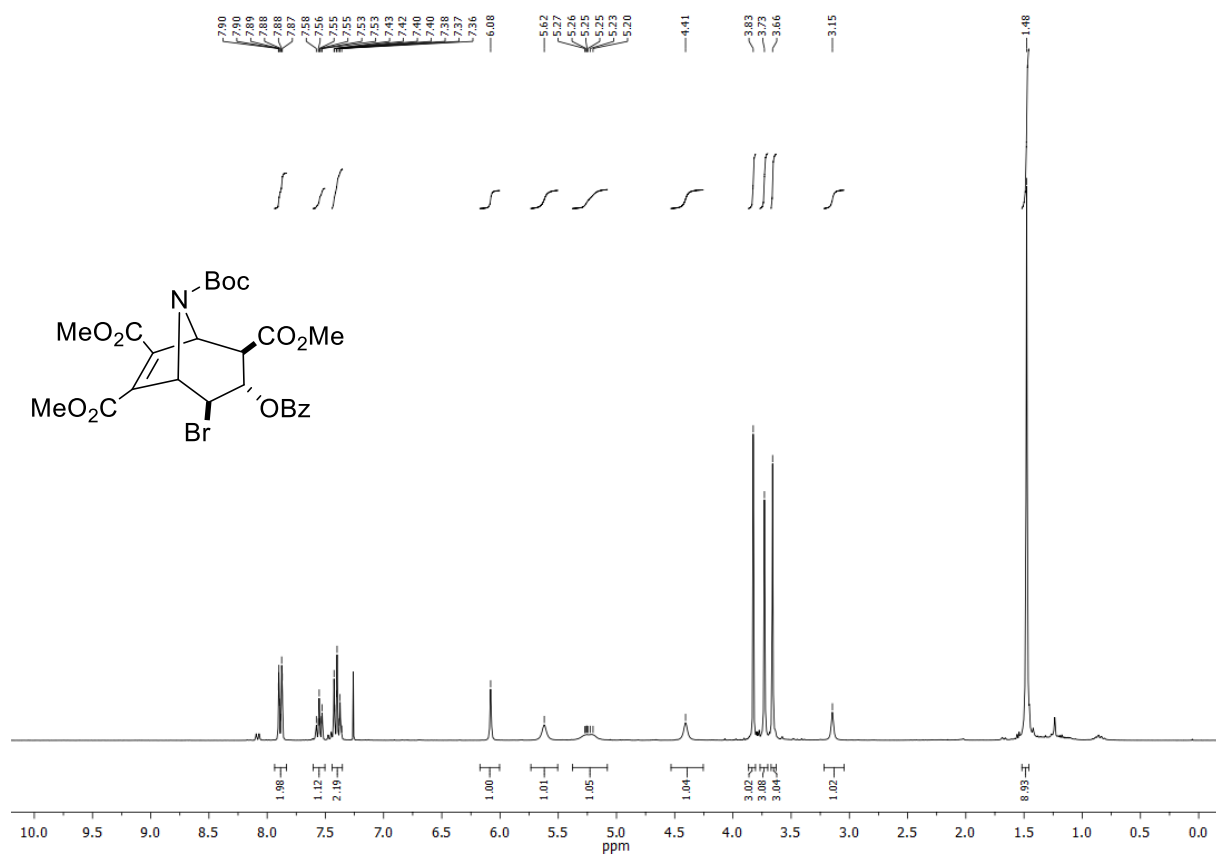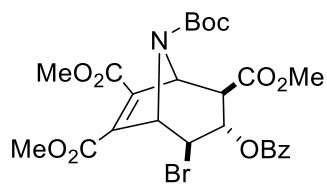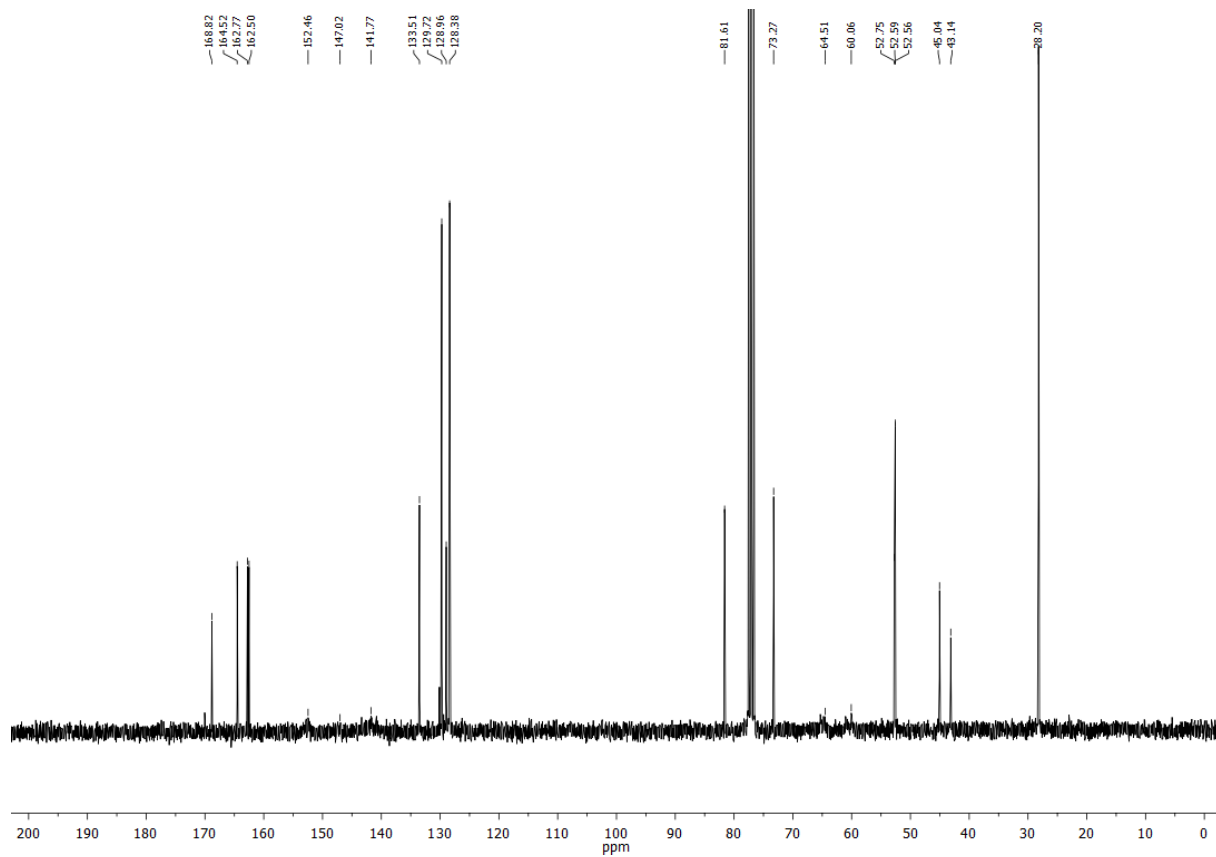

Compound **21**,  $^1\text{H}$  NMR and  $^{13}\text{C}$  NMR ( $\text{CDCl}_3$ ):

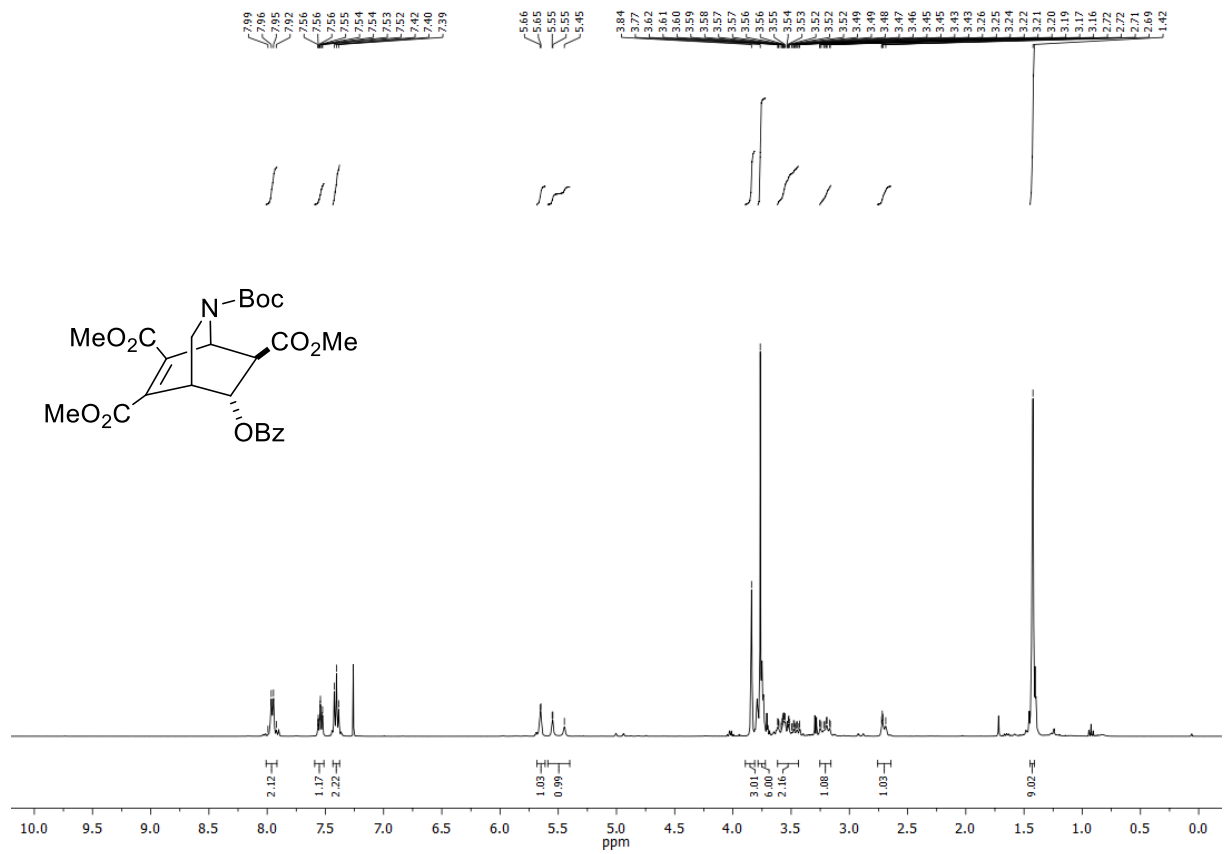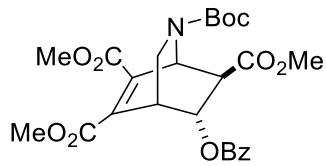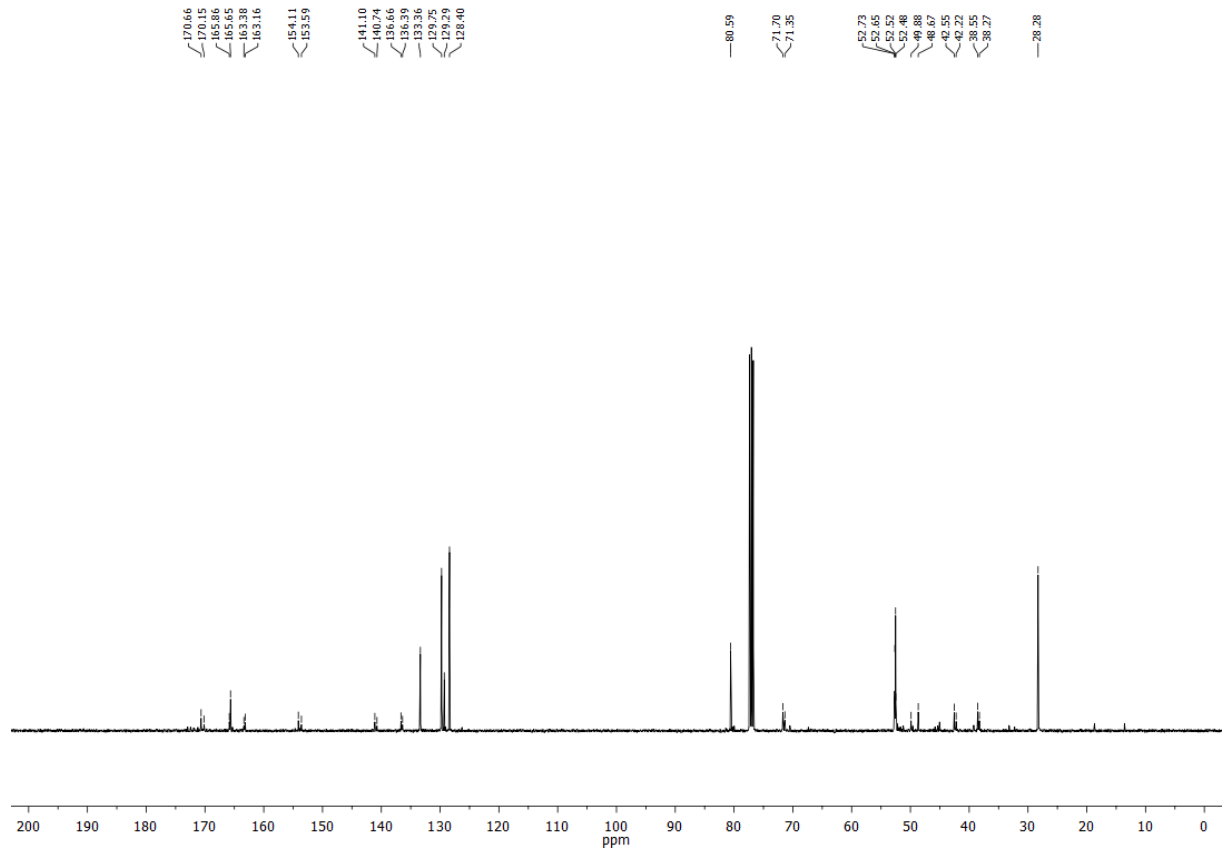

Compound **22**,  $^1\text{H}$  NMR and  $^{13}\text{C}$  NMR ( $\text{CDCl}_3$ ):

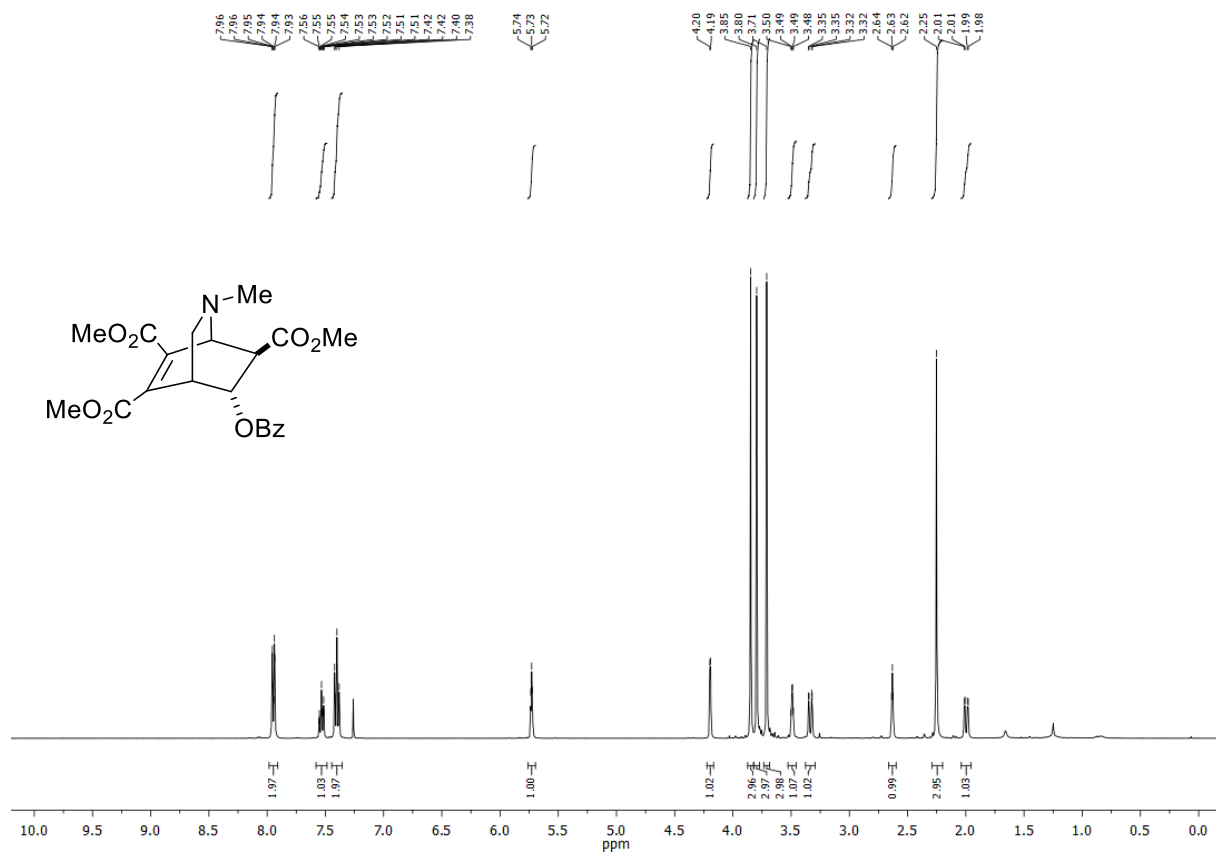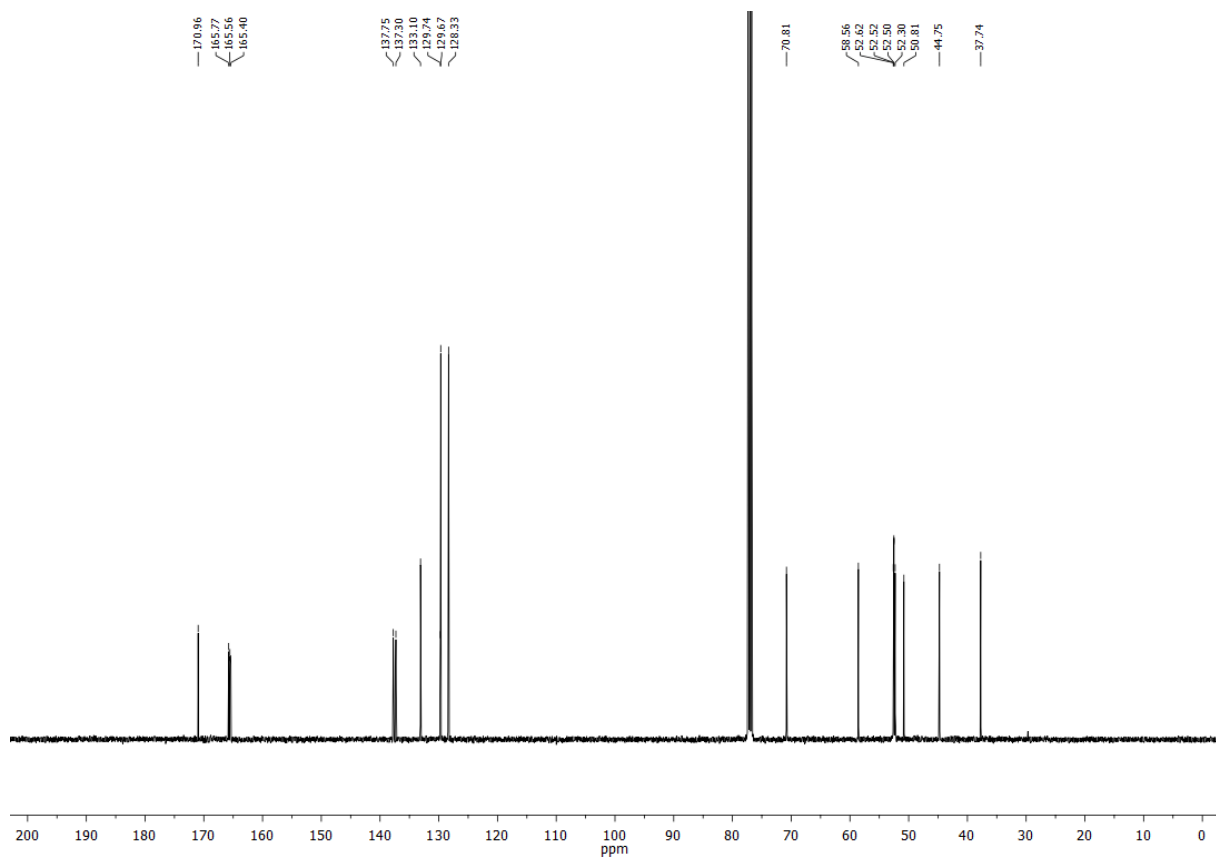

Compound **23**,  $^1\text{H}$  NMR and  $^{13}\text{C}$  NMR ( $\text{CDCl}_3$ ):

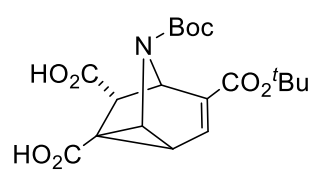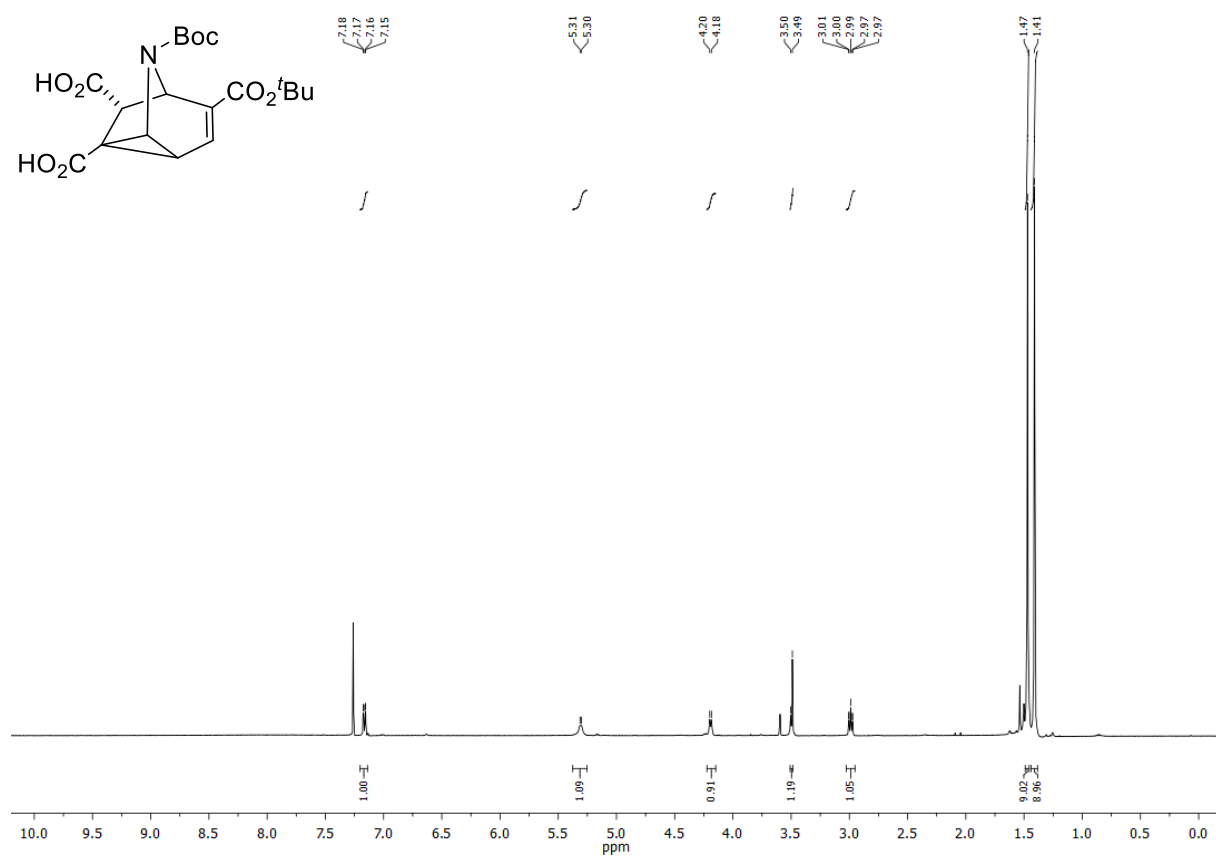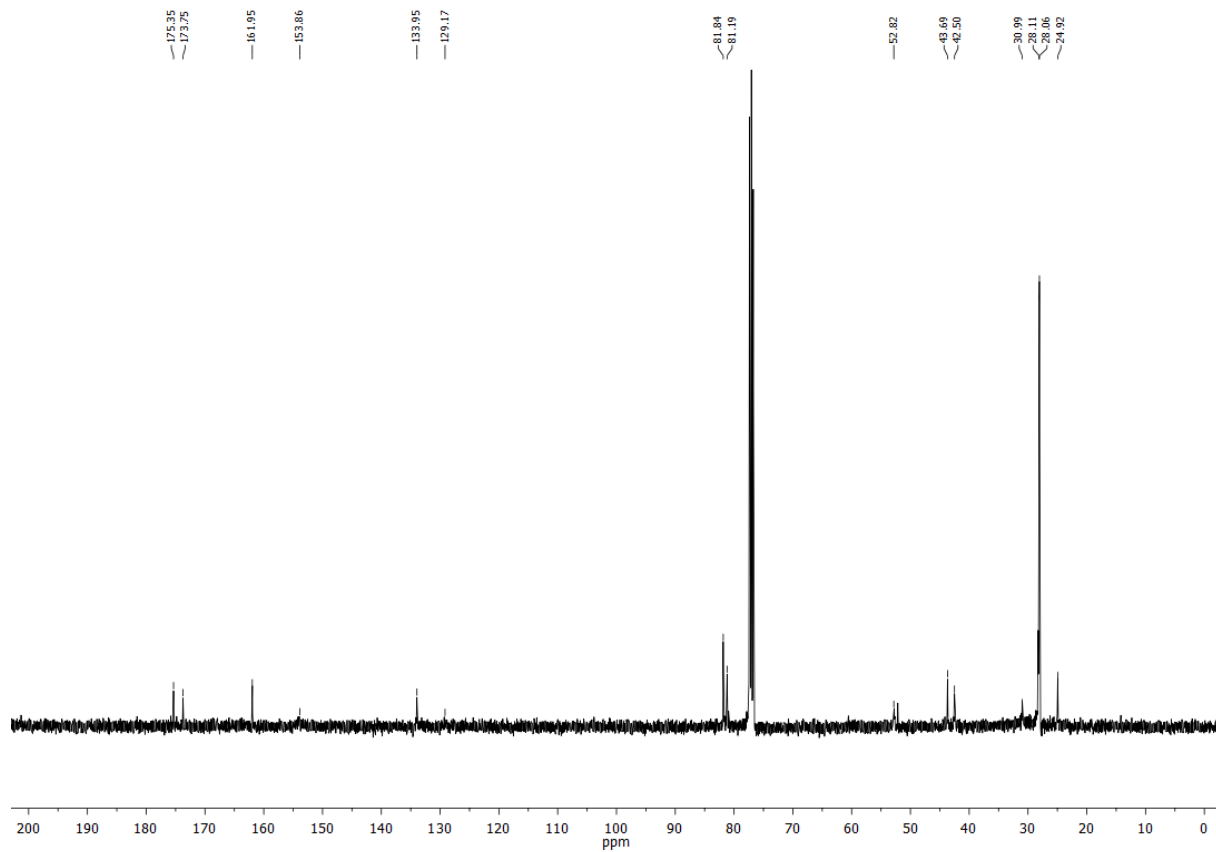



Compound **24**,  $^1\text{H}$  NMR and  $^{13}\text{C}$  NMR ( $\text{CDCl}_3$ ):

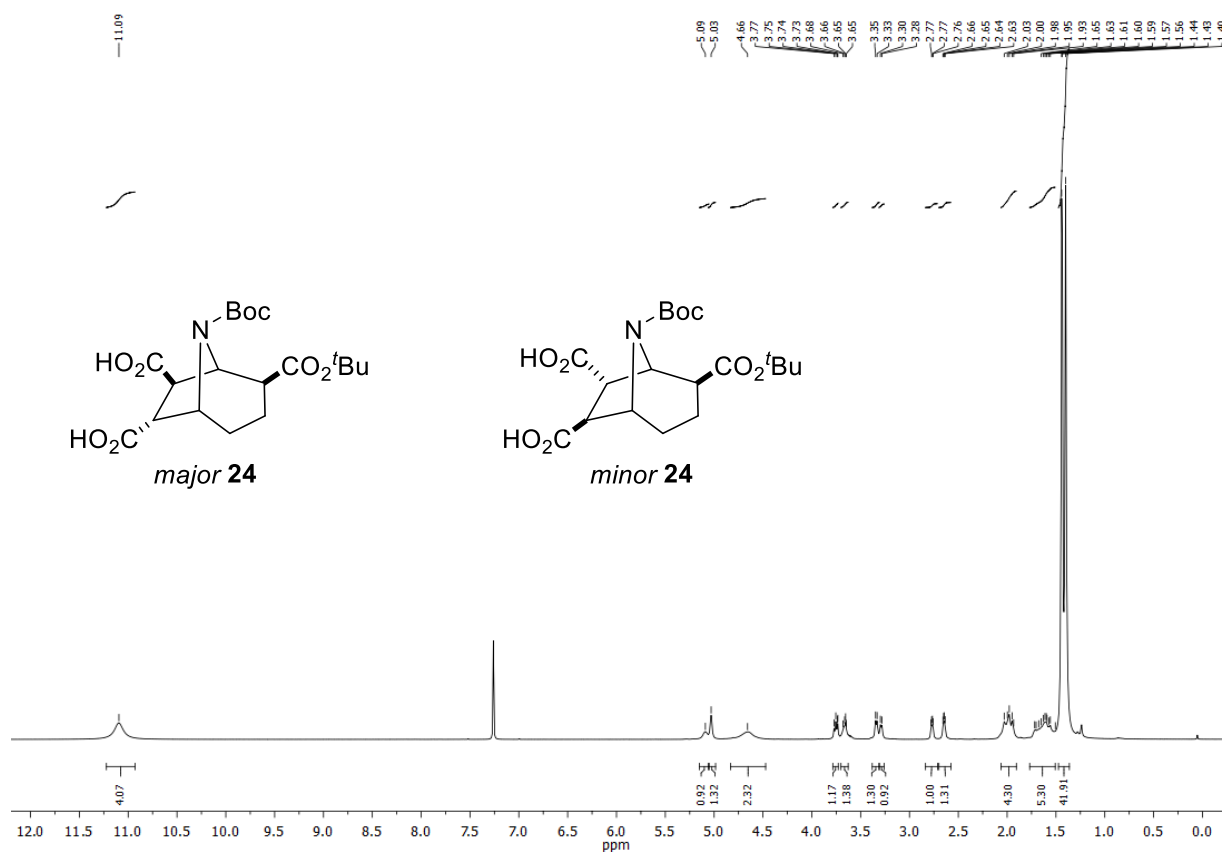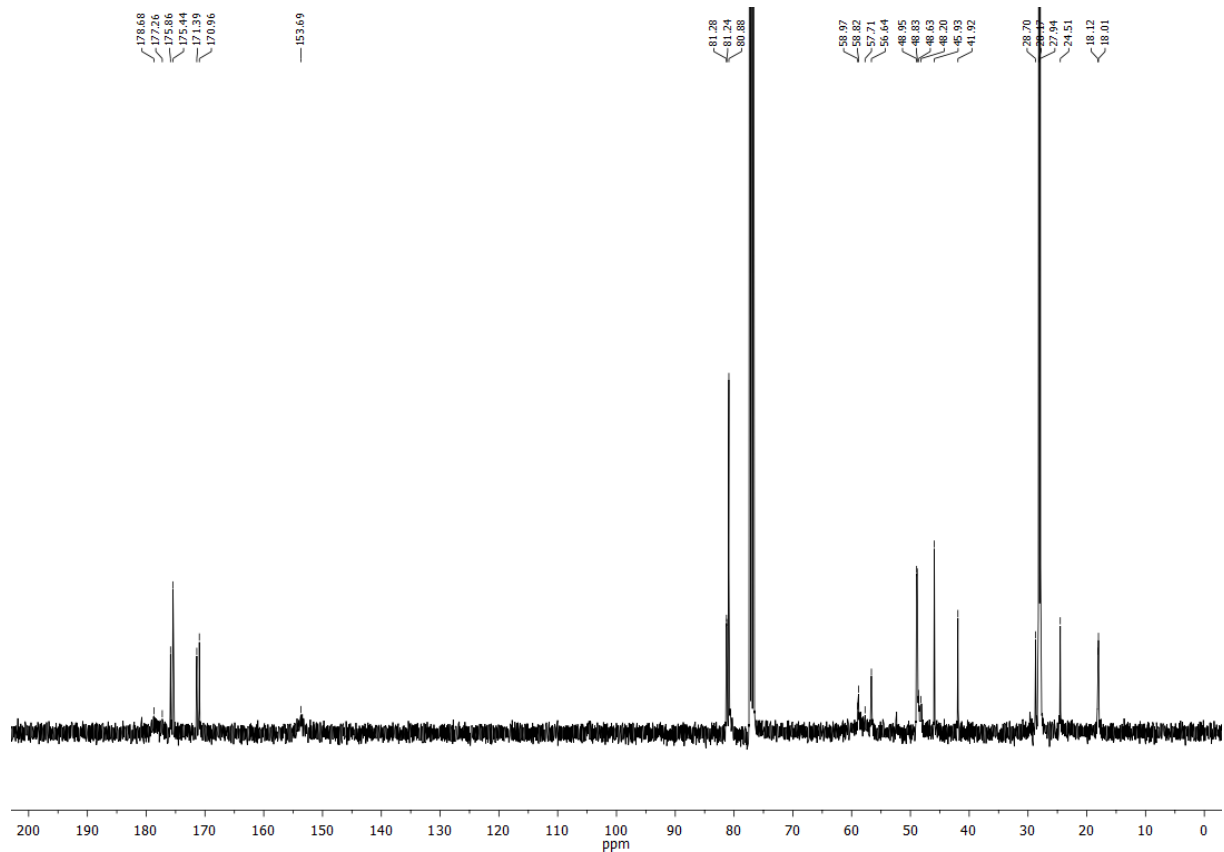

Compound **25**,  $^1\text{H}$  NMR and  $^{13}\text{C}$  NMR ( $\text{DMF-}d_7$ , 333 K):

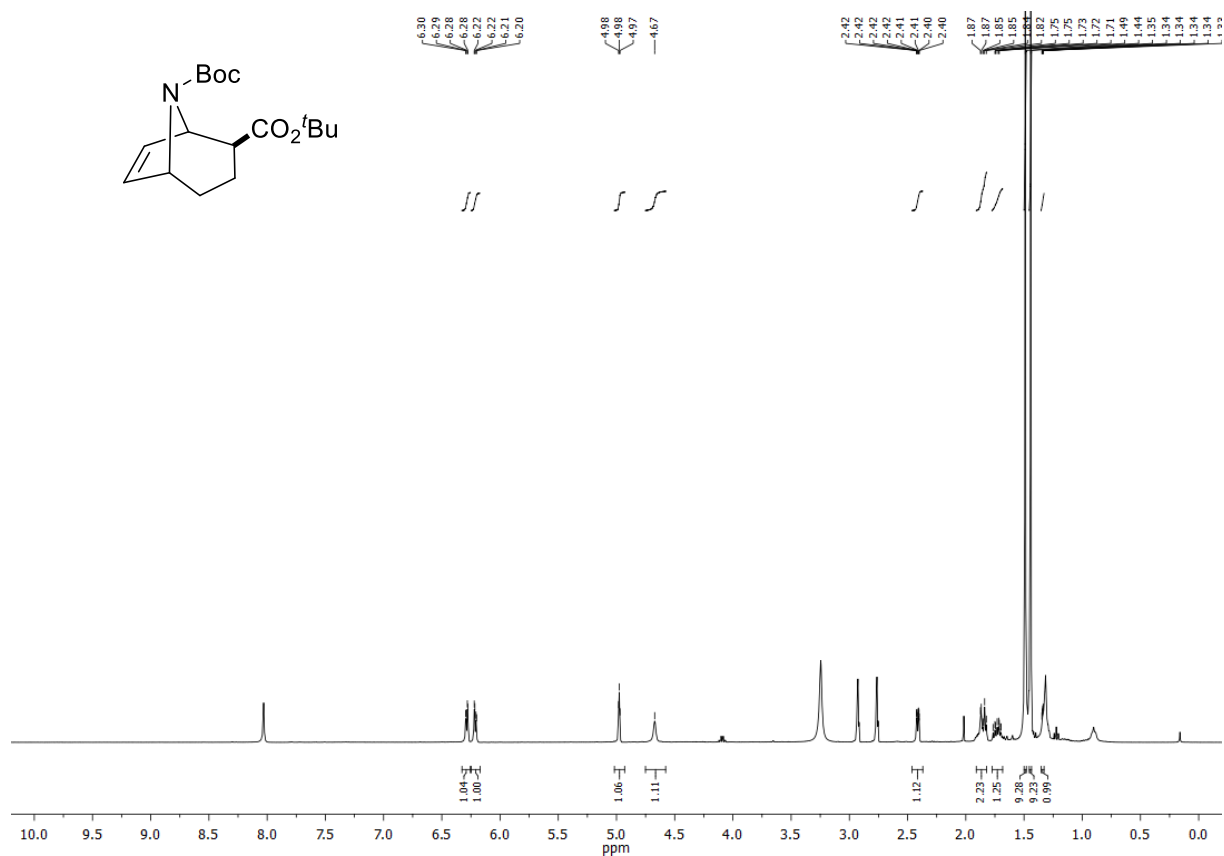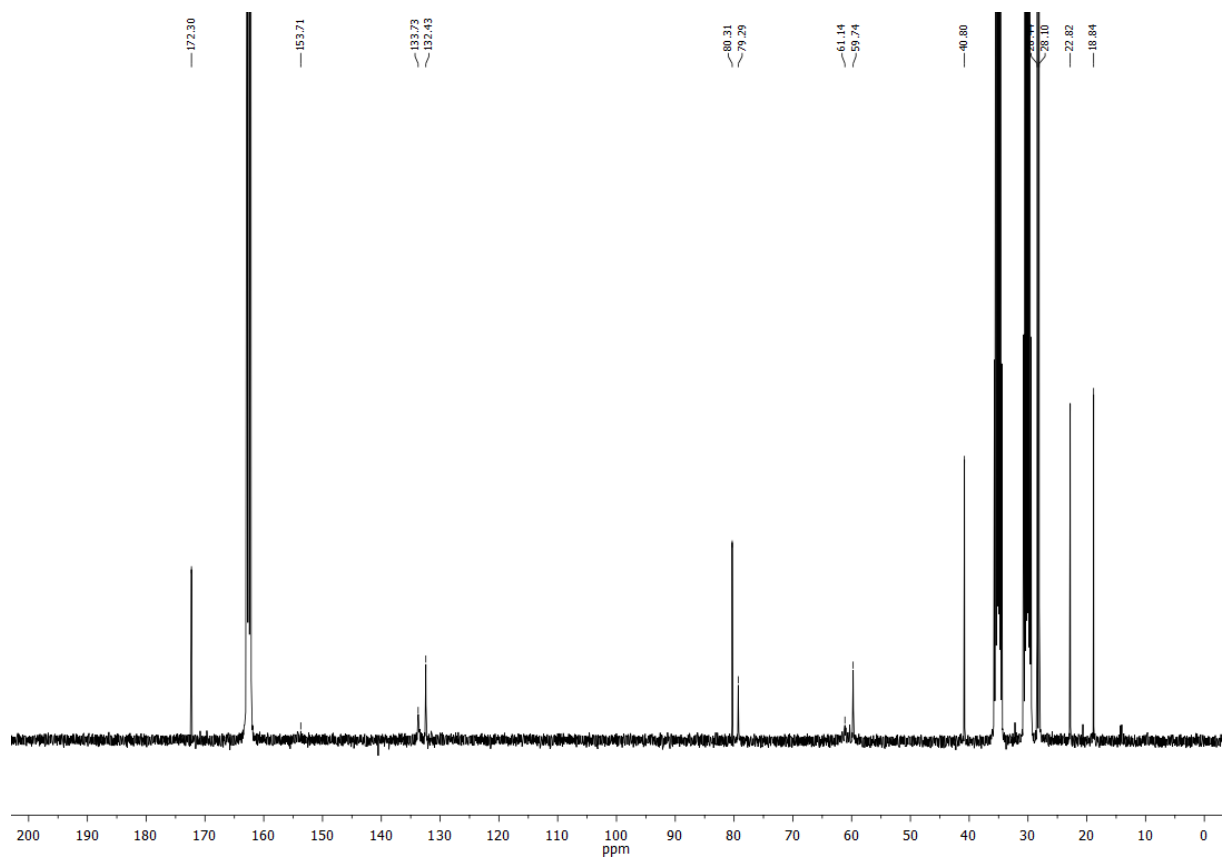

Compound **S2**,  $^1\text{H}$  NMR and  $^{13}\text{C}$  NMR ( $\text{CDCl}_3$ ):

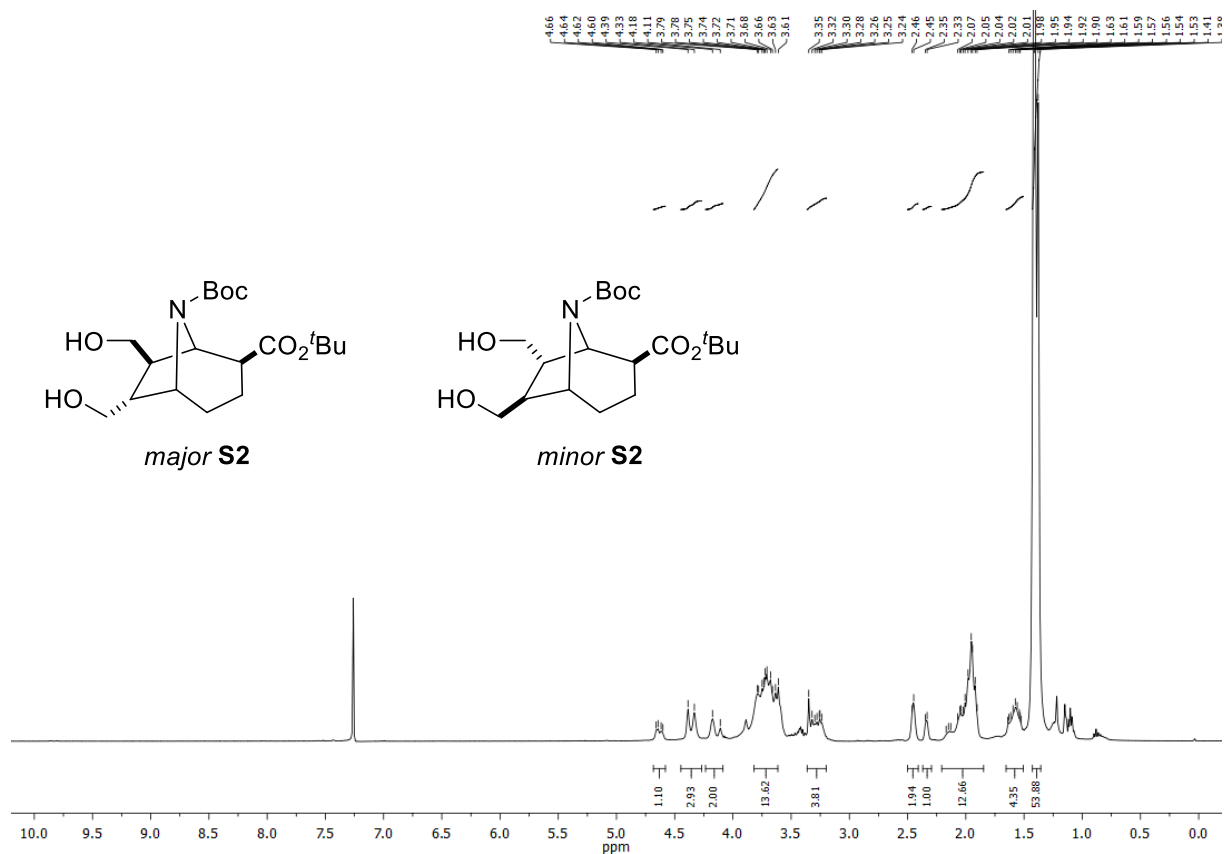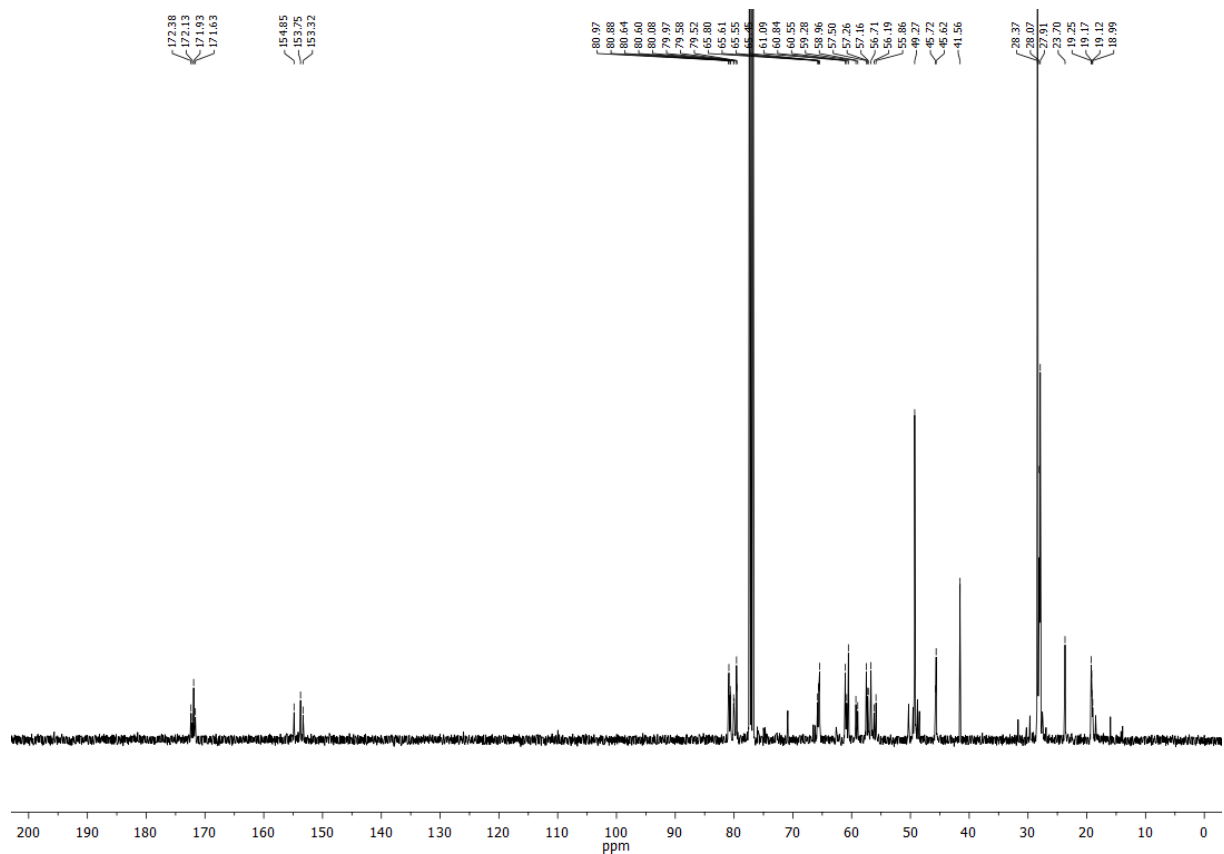

Compound **S3**,  $^1\text{H}$  NMR and  $^{13}\text{C}$  NMR ( $\text{CDCl}_3$ ):

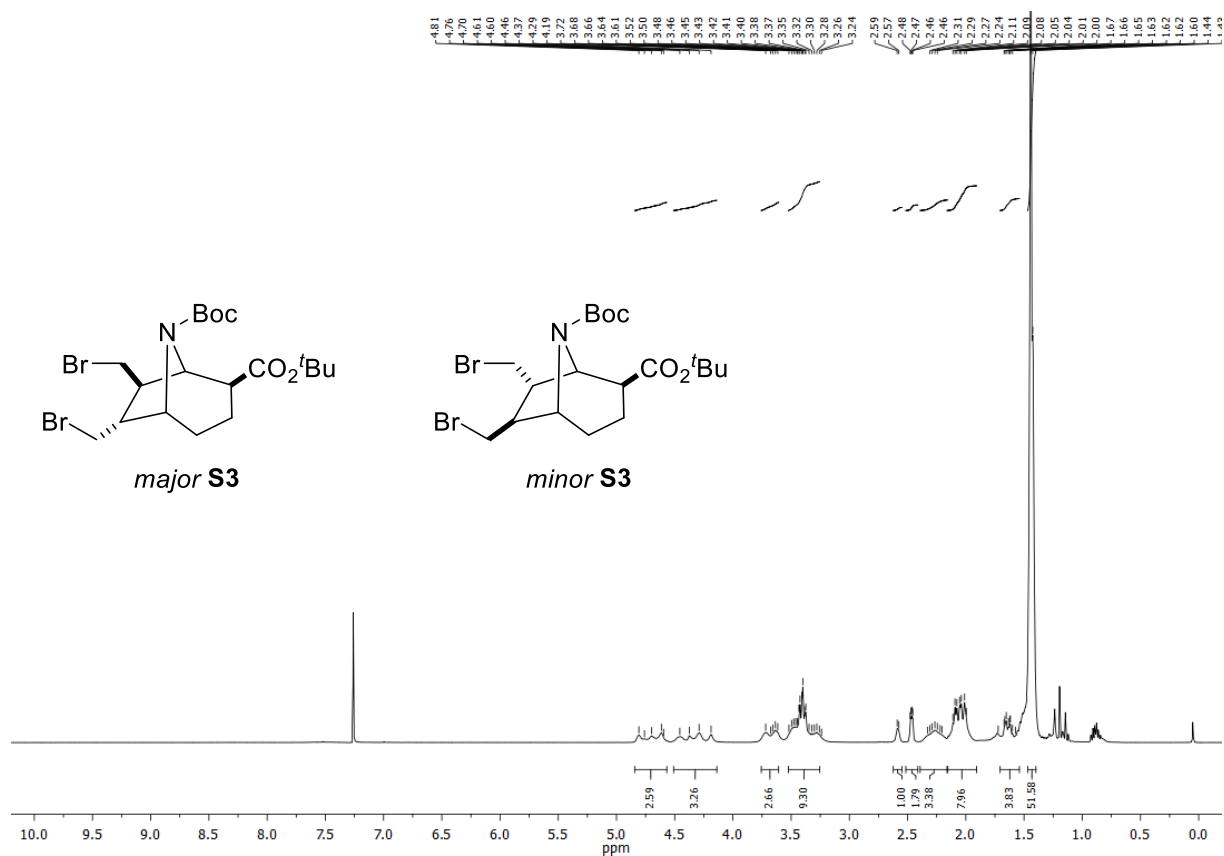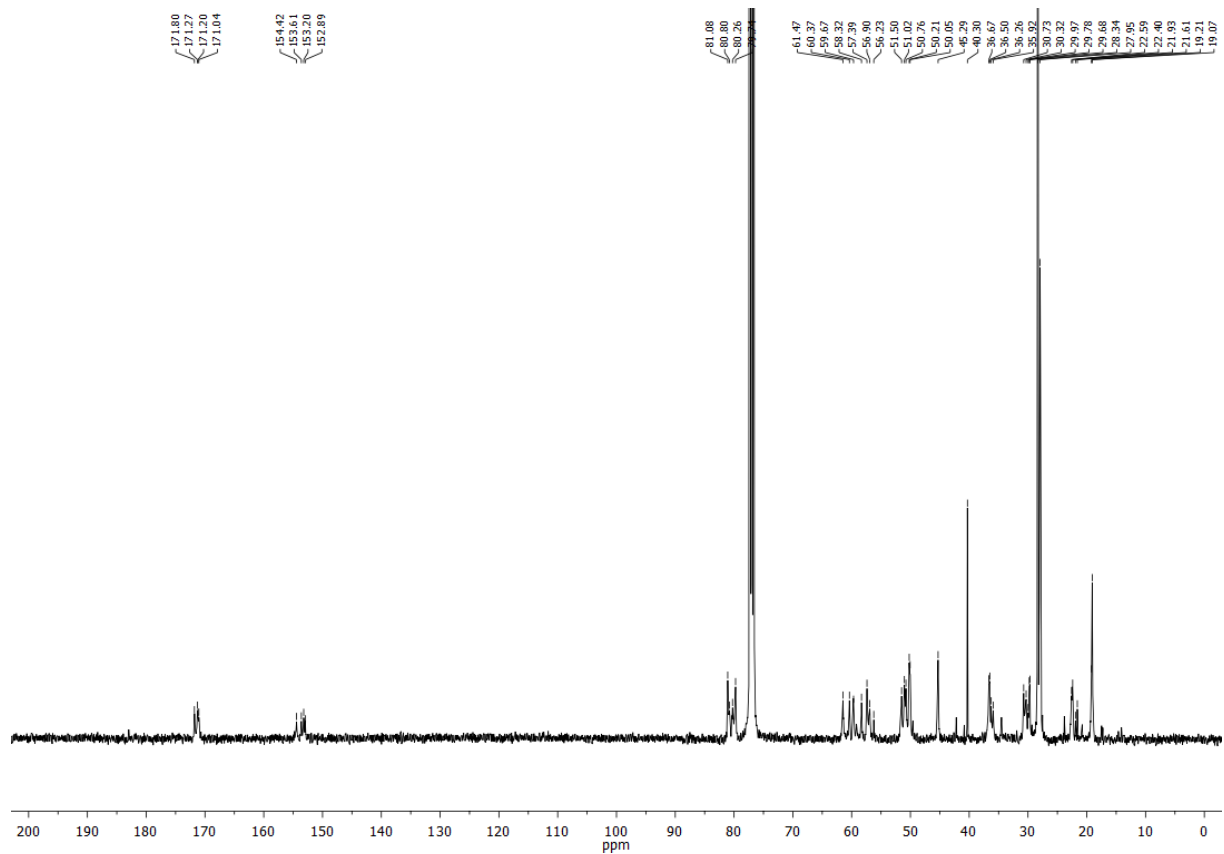

#### 4. X-Ray structures

Ethyl (3*aS*,4*S*,5*S*,8*R*,8*aR*)-1,3-dioxo-9-tosyl-3,3*a*,4,5,8,8*a*-hexahydro-1*H*-4,8-epimino-cyclohepta[*c*]furan-5-carboxylate (7*h*)

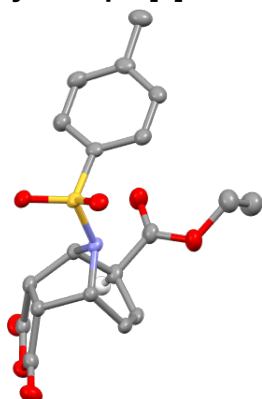

**Table 1.** Crystal Data and structure refinement for **7h**.

|                                               |                                                   |
|-----------------------------------------------|---------------------------------------------------|
| CCDC                                          | 1999261                                           |
| Formula                                       | C <sub>19</sub> H <sub>19</sub> NO <sub>7</sub> S |
| <i>D</i> <sub>calc.</sub> /g cm <sup>-3</sup> | 1.458                                             |
| $\mu$ /mm <sup>-1</sup>                       | 1.947                                             |
| Formula Weight                                | 405.41                                            |
| Color                                         | clear colorless                                   |
| Shape                                         | plate                                             |
| Size/mm <sup>3</sup>                          | 0.24×0.14×0.07                                    |
| <i>T</i> /K                                   | 297.77(10)                                        |
| Crystal System                                | triclinic                                         |
| Space Group                                   | P-1                                               |
| <i>a</i> /Å                                   | 10.9204(3)                                        |
| <i>b</i> /Å                                   | 12.1622(4)                                        |
| <i>c</i> /Å                                   | 14.6939(4)                                        |
| $\alpha$ /°                                   | 94.115(2)                                         |
| $\beta$ /°                                    | 90.637(2)                                         |
| $\gamma$ /°                                   | 108.297(3)                                        |
| <i>V</i> /Å <sup>3</sup>                      | 1846.97(10)                                       |
| <i>Z</i>                                      | 4                                                 |
| <i>Z</i> '                                    | 2                                                 |
| Wavelength/Å                                  | 1.54184                                           |
| Radiation type                                | CuK $\alpha$                                      |
| $\theta$ <sub>min</sub> /°                    | 3.840                                             |
| $\theta$ <sub>max</sub> /°                    | 73.737                                            |
| Measured Refl.                                | 48338                                             |
| Independent Refl.                             | 7407                                              |

|                   |        |
|-------------------|--------|
| Reflections Used  | 6246   |
| $R_{int}$         | 0.0885 |
| Parameters        | 509    |
| Restraints        | 0      |
| Largest Peak      | 0.875  |
| Deepest Hole      | -0.414 |
| GooF              | 1.032  |
| $wR_2$ (all data) | 0.1128 |
| $wR_2$            | 0.1064 |
| $R_1$ (all data)  | 0.0490 |
| $R_1$             | 0.0400 |

**4-Ethyl 1,6,7-trimethyl (1*R*,4*S*,5*S*)-8-oxabicyclo[3.2.1]octa-2,6-diene-1,4,6,7-tetracarboxylate ((+)-8a)**

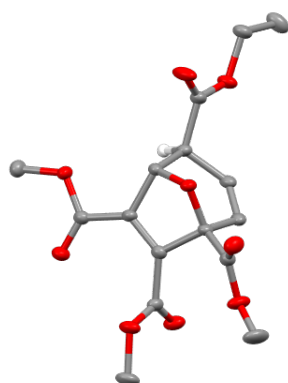

**Table 2.** Crystal Data and structure refinement for ((+)-8a).

|                              |                                                |
|------------------------------|------------------------------------------------|
| CCDC                         | 1999262                                        |
| Formula                      | C <sub>16</sub> H <sub>18</sub> O <sub>9</sub> |
| $D_{calc.}/g\text{ cm}^{-3}$ | 1.417                                          |
| $\mu/\text{mm}^{-1}$         | 1.008                                          |
| Formula Weight               | 354.30                                         |
| Color                        | clear colorless                                |
| Shape                        | prism                                          |
| Size/mm <sup>3</sup>         | 0.32×0.16×0.10                                 |
| $T/K$                        | 123.00(10)                                     |
| Crystal System               | monoclinic                                     |
| Flack Parameter              | -0.27(10)                                      |
| Hooft Parameter              | -0.23(8)                                       |
| Space Group                  | $P2_1$                                         |
| $a/\text{Å}$                 | 11.4633(2)                                     |
| $b/\text{Å}$                 | 10.4467(2)                                     |

|                                           |                                                               |
|-------------------------------------------|---------------------------------------------------------------|
| <i>c</i> /Å                               | 13.8700(2)                                                    |
| <i>α</i> °                                | 90                                                            |
| <i>β</i> °                                | 90.5520(10)                                                   |
| <i>γ</i> °                                | 90                                                            |
| <i>V</i> /Å <sup>3</sup>                  | 1660.91(5)                                                    |
| <i>Z</i>                                  | 4                                                             |
| <i>Z'</i>                                 | 2                                                             |
| Wavelength/Å                              | 1.54184                                                       |
| Radiation type                            | CuK <sub>α</sub>                                              |
| <i>θ</i> <sub>min</sub> /°                | 3.186                                                         |
| <i>θ</i> <sub>max</sub> /°                | 74.008                                                        |
| Measured Refl.                            | 9844                                                          |
| Independent Refl.                         | 5075                                                          |
| Reflections with <i>I</i> > 2( <i>I</i> ) | 4841                                                          |
| <i>R</i> <sub>int</sub>                   | 0.0258                                                        |
| Parameters                                | 584                                                           |
| Restraints                                | 1                                                             |
| Largest Peak                              | 0.235                                                         |
| Deepest Hole                              | -0.190                                                        |
| GooF                                      | 1.039                                                         |
| <i>wR</i> <sub>2</sub> (all data)         | 0.0836                                                        |
| <i>wR</i> <sub>2</sub>                    | 0.0820                                                        |
| <i>R</i> <sub>1</sub> (all data)          | 0.0342                                                        |
| <i>R</i> <sub>1</sub>                     | 0.0319                                                        |
| Creation Method                           |                                                               |
| Solution                                  | Olex2 1.2-alpha                                               |
| Refinement                                | (compiled 2018.07.26 svn.r3523 for OlexSys,<br>GUI svn.r5532) |

---

**4-Ethyl 1-methyl (1*R*,4*S*,5*R*,6*R*,7*R*)-6,7-dicyano-8-oxabicyclo[3.2.1]oct-2-ene-1,4-dicarboxylate (major (-)-8d)**

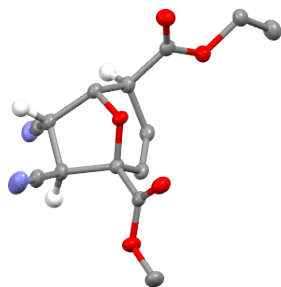

**Table 3.** Crystal Data and structure refinement for *major* (-)-8d.

|                              |                                                               |
|------------------------------|---------------------------------------------------------------|
| CCDC                         | 1999263                                                       |
| Formula                      | C <sub>14</sub> H <sub>14</sub> N <sub>2</sub> O <sub>5</sub> |
| $D_{calc.}/g\text{ cm}^{-3}$ | 1.398                                                         |
| $\mu/\text{mm}^{-1}$         | 0.659                                                         |
| Formula Weight               | 290.27                                                        |
| Color                        | clear colorless                                               |
| Shape                        | prism                                                         |
| Size/mm <sup>3</sup>         | 0.19×0.13×0.10                                                |
| $T/K$                        | 123.00(10)                                                    |
| Crystal System               | monoclinic                                                    |
| Flack Parameter              | 0.03(9)                                                       |
| Hooft Parameter              | 0.03(8)                                                       |
| Space Group                  | $P2_1$                                                        |
| $a/\text{Å}$                 | 5.65010(10)                                                   |
| $b/\text{Å}$                 | 10.67929(18)                                                  |
| $c/\text{Å}$                 | 11.4284(2)                                                    |
| $\alpha^\circ$               | 90                                                            |
| $\beta^\circ$                | 90.9031(16)                                                   |
| $\gamma^\circ$               | 90                                                            |
| $V/\text{Å}^3$               | 689.50(2)                                                     |
| $Z$                          | 2                                                             |
| $Z'$                         | 1                                                             |
| Wavelength/Å                 | 1.39222                                                       |
| Radiation type               | CuK $\alpha$                                                  |
| $\theta_{min}/^\circ$        | 3.493                                                         |
| $\theta_{max}/^\circ$        | 74.308                                                        |
| Measured Refl's.             | 13708                                                         |
| Ind't Refl's                 | 3776                                                          |
| Refl's with $I > 2(I)$       | 3653                                                          |
| $R_{int}$                    | 0.0351                                                        |
| Parameters                   | 192                                                           |



|                   |        |
|-------------------|--------|
| Restraints        | 1      |
| Largest Peak      | 0.311  |
| Deepest Hole      | -0.132 |
| GooF              | 1.061  |
| $wR_2$ (all data) | 0.0813 |
| $wR_2$            | 0.0805 |
| $R_1$ (all data)  | 0.0314 |
| $R_1$             | 0.0302 |

---

**5-Ethyl 1,7,8-trimethyl (1*S*,2*R*,4*R*,5*R*,6*S*)-3,9-dioxatricyclo[4.2.1.0<sup>2,4</sup>]non-7-ene-1,5,7,8-tetracarboxylate (10)**

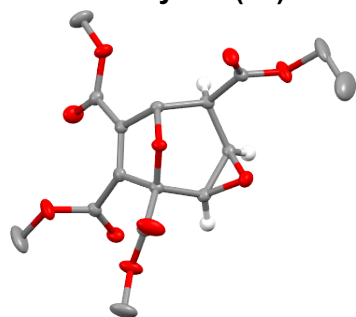

**Table 4.** Crystal Data and structure refinement for **10**.

---

|                        |                                                 |
|------------------------|-------------------------------------------------|
| CCDC                   | 1999265                                         |
| Formula                | C <sub>16</sub> H <sub>18</sub> O <sub>10</sub> |
| $D_{calc.}/g\ cm^{-3}$ | 1.397                                           |
| $\mu/mm^{-1}$          | 1.020                                           |
| Formula Weight         | 370.30                                          |
| Color                  | clear colorless                                 |
| Shape                  | prism                                           |
| Size/mm <sup>3</sup>   | 0.27×0.12×0.08                                  |
| $T/K$                  | 123.00(10)                                      |
| Crystal System         | hexagonal                                       |
| Flack Parameter        | 0.01(3)                                         |
| Hoof Parameter         | 0.02(3)                                         |
| Space Group            | $P6_5$                                          |
| $a/\text{Å}$           | 10.00860(10)                                    |
| $b/\text{Å}$           | 10.00860(10)                                    |
| $c/\text{Å}$           | 30.4389(3)                                      |
| $\alpha^\circ$         | 90                                              |
| $\beta^\circ$          | 90                                              |
| $\gamma^\circ$         | 120                                             |
| $V/\text{Å}^3$         | 2640.62(6)                                      |

|                             |                                                               |
|-----------------------------|---------------------------------------------------------------|
| Z                           | 6                                                             |
| Z'                          | 1                                                             |
| Wavelength/Å                | 1.54184                                                       |
| Radiation type              | CuK $\alpha$                                                  |
| $\theta_{min}$ /°           | 5.103                                                         |
| $\theta_{max}$ /°           | 73.574                                                        |
| Measured Refl.              | 31431                                                         |
| Independent Refl.           | 3549                                                          |
| Reflections with $I > 2(I)$ | 3501                                                          |
| $R_{int}$                   | 0.0267                                                        |
| Parameters                  | 239                                                           |
| Restraints                  | 1                                                             |
| Largest Peak                | 0.343                                                         |
| Deepest Hole                | -0.182                                                        |
| GooF                        | 1.039                                                         |
| $wR_2$ (all data)           | 0.0684                                                        |
| $wR_2$                      | 0.0680                                                        |
| $R_1$ (all data)            | 0.0264                                                        |
| $R_1$                       | 0.0260                                                        |
| Creation Method             |                                                               |
| Solution                    | Olex2 1.2-alpha                                               |
| Refinement                  | (compiled 2018.07.26 svn.r3523 for OlexSys,<br>GUI svn.r5532) |

**9-(*Tert*-butyl) 5-ethyl 7,8-dimethyl (1*S*,2*S*,4*R*,5*R*,6*S*)-3-oxa-9-azatricyclo[4.2.1.0<sup>2,4</sup>]non-7-ene-5,7,8,9-tetracarboxylate (14)**

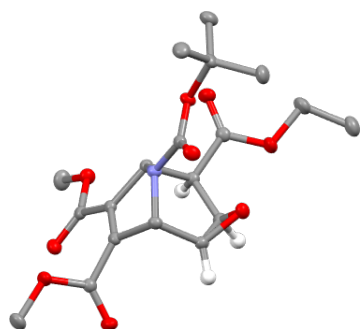

**Table 5.** Crystal Data and structure refinement for **14**.

|                                 |                                                 |
|---------------------------------|-------------------------------------------------|
| CCDC                            | 1999266                                         |
| Formula                         | C <sub>19</sub> H <sub>25</sub> NO <sub>9</sub> |
| $D_{calc.}$ /g cm <sup>-3</sup> | 1.387                                           |
| $\mu$ /mm <sup>-1</sup>         | 0.941                                           |

|                                           |                                                               |
|-------------------------------------------|---------------------------------------------------------------|
| Formula Weight                            | 411.40                                                        |
| Color                                     | clear colorless                                               |
| Shape                                     | prism                                                         |
| Size/mm <sup>3</sup>                      | 0.34×0.27×0.20                                                |
| <i>T</i> /K                               | 123.01(10)                                                    |
| Crystal System                            | monoclinic                                                    |
| Space Group                               | <i>P</i> 2 <sub>1</sub> / <i>c</i>                            |
| <i>a</i> /Å                               | 8.45516(11)                                                   |
| <i>b</i> /Å                               | 24.5268(3)                                                    |
| <i>c</i> /Å                               | 9.65894(13)                                                   |
| $\alpha$ <sup>°</sup>                     | 90                                                            |
| $\beta$ <sup>°</sup>                      | 100.4790(13)                                                  |
| $\gamma$ <sup>°</sup>                     | 90                                                            |
| <i>V</i> /Å <sup>3</sup>                  | 1969.65(5)                                                    |
| <i>Z</i>                                  | 4                                                             |
| <i>Z</i> '                                | 1                                                             |
| Wavelength/Å                              | 1.54184                                                       |
| Radiation type                            | CuK $\alpha$                                                  |
| $\theta_{min}$ <sup>°</sup>               | 4.993                                                         |
| $\theta_{max}$ <sup>°</sup>               | 74.260                                                        |
| Measured Refl.                            | 21717                                                         |
| Independent Refl.                         | 3965                                                          |
| Reflections with <i>I</i> > 2( <i>I</i> ) | 3735                                                          |
| <i>R</i> <sub>int</sub>                   | 0.0210                                                        |
| Parameters                                | 268                                                           |
| Restraints                                | 0                                                             |
| Largest Peak                              | 0.251                                                         |
| Deepest Hole                              | -0.294                                                        |
| Goof                                      | 1.057                                                         |
| <i>wR</i> <sub>2</sub> (all data)         | 0.0822                                                        |
| <i>wR</i> <sub>2</sub>                    | 0.0805                                                        |
| <i>R</i> <sub>1</sub> (all data)          | 0.0340                                                        |
| <i>R</i> <sub>1</sub>                     | 0.0322                                                        |
| Creation Method                           |                                                               |
| Solution                                  | Olex2 1.2-alpha                                               |
| Refinement                                | (compiled 2018.07.26 svn.r3523 for OlexSys,<br>GUI svn.r5532) |

---

**8-(*Tert*-butyl) 2-ethyl 6,7-dimethyl (1*S*,2*R*,3*S*,4*R*,5*S*)-4-bromo-3-hydroxy-8-azabicyclo-[3.2.1]oct-6-ene-2,6,7,8-tetracarboxylate (S1)**

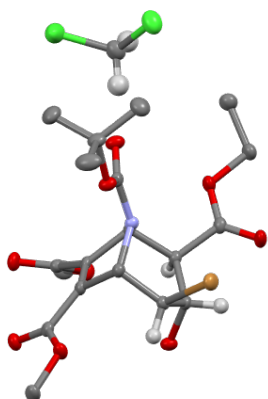

**Table 6.** Crystal Data and structure refinement for **S1**.

|                                               |                                                                   |
|-----------------------------------------------|-------------------------------------------------------------------|
| CCDC                                          | 1999267                                                           |
| Formula                                       | C <sub>20</sub> H <sub>28</sub> BrCl <sub>2</sub> NO <sub>9</sub> |
| <i>D</i> <sub>calc.</sub> /g cm <sup>-3</sup> | 1.598                                                             |
| $\mu$ /mm <sup>-1</sup>                       | 4.837                                                             |
| Formula Weight                                | 577.24                                                            |
| Color                                         | dull colorless                                                    |
| Shape                                         | block                                                             |
| Size/mm <sup>3</sup>                          | 0.21×0.13×0.10                                                    |
| <i>T</i> /K                                   | 123.01(10)                                                        |
| Crystal System                                | monoclinic                                                        |
| Space Group                                   | <i>P</i> 2 <sub>1</sub> / <i>c</i>                                |
| <i>a</i> /Å                                   | 20.4103(4)                                                        |
| <i>b</i> /Å                                   | 9.77236(17)                                                       |
| <i>c</i> /Å                                   | 12.09234(16)                                                      |
| $\alpha$ /°                                   | 90                                                                |
| $\beta$ /°                                    | 95.9969(14)                                                       |
| $\gamma$ /°                                   | 90                                                                |
| <i>V</i> /Å <sup>3</sup>                      | 2398.70(7)                                                        |
| <i>Z</i>                                      | 4                                                                 |
| <i>Z</i> '                                    | 1                                                                 |
| Wavelength/Å                                  | 1.54184                                                           |
| Radiation type                                | CuK $\alpha$                                                      |
| $\theta$ <sub>min</sub> /°                    | 4.356                                                             |
| $\theta$ <sub>max</sub> /°                    | 74.175                                                            |
| Measured Refl.                                | 26622                                                             |
| Independent Refl.                             | 4800                                                              |
| Reflections with <i>I</i> > 2( <i>I</i> )     | 4469                                                              |
| <i>R</i> <sub>int</sub>                       | 0.0316                                                            |

|                   |                                                               |
|-------------------|---------------------------------------------------------------|
| Parameters        | 305                                                           |
| Restraints        | 0                                                             |
| Largest Peak      | 0.751                                                         |
| Deepest Hole      | -0.570                                                        |
| GooF              | 1.088                                                         |
| $wR_2$ (all data) | 0.0873                                                        |
| $wR_2$            | 0.0857                                                        |
| $R_1$ (all data)  | 0.0347                                                        |
| $R_1$             | 0.0324                                                        |
| Creation Method   |                                                               |
| Solution          | Olex2 1.2-alpha                                               |
| Refinement        | (compiled 2018.07.26 svn.r3523 for OlexSys,<br>GUI svn.r5532) |

**8-(*Tert*-butyl) 2-ethyl 6,7-dimethyl (1*S*,2*S*,5*R*,6*R*,7*S*)-6,7-dihydroxy-8-azabicyclo-[3.2.1]oct-3-ene-2,6,7,8-tetracarboxylate (18)**

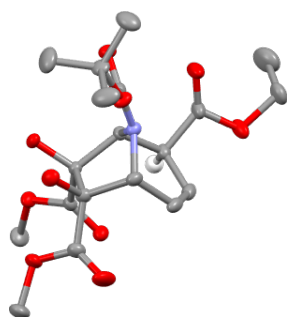

**Table 7.** Crystal Data and structure refinement for **18**.

|                              |                                                  |
|------------------------------|--------------------------------------------------|
| CCDC                         | 1999268                                          |
| Formula                      | C <sub>19</sub> H <sub>27</sub> NO <sub>10</sub> |
| $D_{calc.}/g\text{ cm}^{-3}$ | 1.358                                            |
| $\mu/\text{mm}^{-1}$         | 0.940                                            |
| Formula Weight               | 429.41                                           |
| Color                        | clear colorless                                  |
| Shape                        | prism                                            |
| Size/ $\text{mm}^3$          | 0.25×0.15×0.08                                   |
| $T/\text{K}$                 | 123.01(10)                                       |
| Crystal System               | monoclinic                                       |
| Space Group                  | $P2_1/n$                                         |
| $a/\text{Å}$                 | 10.16720(10)                                     |
| $b/\text{Å}$                 | 21.6652(2)                                       |
| $c/\text{Å}$                 | 19.1977(2)                                       |
| $\alpha/^\circ$              | 90                                               |

|                             |              |
|-----------------------------|--------------|
| $\beta$ /°                  | 96.5370(10)  |
| $\gamma$ /°                 | 90           |
| $V/\text{Å}^3$              | 4201.27(7)   |
| $Z$                         | 8            |
| $Z'$                        | 2            |
| Wavelength/Å                | 1.54184      |
| Radiation type              | CuK $\alpha$ |
| $\theta_{min}$ /°           | 4.081        |
| $\theta_{max}$ /°           | 74.212       |
| Measured Refl.              | 43126        |
| Independent Refl.           | 8419         |
| Reflections with $I > 2(I)$ | 7647         |
| $R_{int}$                   | 0.0295       |
| Parameters                  | 777          |
| Restraints                  | 42           |
| Largest Peak                | 0.501        |
| Deepest Hole                | -0.329       |
| GooF                        | 1.019        |
| $wR_2$ (all data)           | 0.1112       |
| $wR_2$                      | 0.1073       |
| $R_1$ (all data)            | 0.0437       |
| $R_1$                       | 0.0400       |

**Trimethyl (1*S*,4*R*,7*R*,8*R*)-8-(benzoyloxy)-2-methyl-2-azabicyclo[2.2.2]oct-5-ene-5,6,7-tricarboxylate (22)**

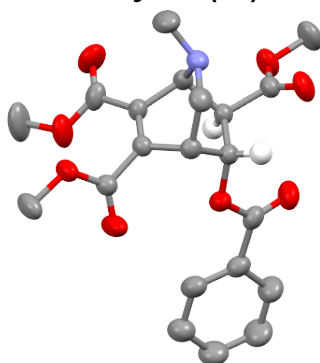

**Table 8.** Crystal Data and structure refinement for **22**.

|                              |                                                 |
|------------------------------|-------------------------------------------------|
| CCDC                         | 1999270                                         |
| Formula                      | C <sub>21</sub> H <sub>23</sub> NO <sub>8</sub> |
| $D_{calc.}/\text{g cm}^{-3}$ | 1.338                                           |
| $\mu/\text{mm}^{-1}$         | 0.870                                           |
| Formula Weight               | 417.40                                          |

|                                      |                                    |
|--------------------------------------|------------------------------------|
| Color                                | clear colorless                    |
| Shape                                | prism                              |
| Size/mm <sup>3</sup>                 | 0.20×0.11×0.06                     |
| <i>T</i> /K                          | 293(2)                             |
| Crystal System                       | monoclinic                         |
| Space Group                          | <i>P</i> 2 <sub>1</sub> / <i>c</i> |
| <i>a</i> /Å                          | 19.5386(3)                         |
| <i>b</i> /Å                          | 9.90775(17)                        |
| <i>c</i> /Å                          | 10.74109(19)                       |
| $\alpha$ <sup>°</sup>                | 90                                 |
| $\beta$ <sup>°</sup>                 | 94.6462(16)                        |
| $\gamma$ <sup>°</sup>                | 90                                 |
| <i>V</i> /Å <sup>3</sup>             | 2072.46(6)                         |
| <i>Z</i>                             | 4                                  |
| <i>Z</i> '                           | 1                                  |
| Wavelength/Å                         | 1.54184                            |
| Radiation type                       | CuK $\alpha$                       |
| $\theta_{min}$ <sup>°</sup>          | 4.541                              |
| $\theta_{max}$ <sup>°</sup>          | 72.581                             |
| Measured Refl's.                     | 22284                              |
| Ind't Refl's                         | 4069                               |
| Refl's with <i>I</i> > 2( <i>I</i> ) | 3538                               |
| <i>R</i> <sub>int</sub>              | 0.0208                             |
| Parameters                           | 287                                |
| Restraints                           | 151                                |
| Largest Peak                         | 0.405                              |
| Deepest Hole                         | -0.241                             |
| GooF                                 | 1.028                              |
| <i>wR</i> <sub>2</sub> (all data)    | 0.1340                             |
| <i>wR</i> <sub>2</sub>               | 0.1269                             |
| <i>R</i> <sub>1</sub> (all data)     | 0.0521                             |
| <i>R</i> <sub>1</sub>                | 0.0461                             |

---

## 5. HPLC chromatograms

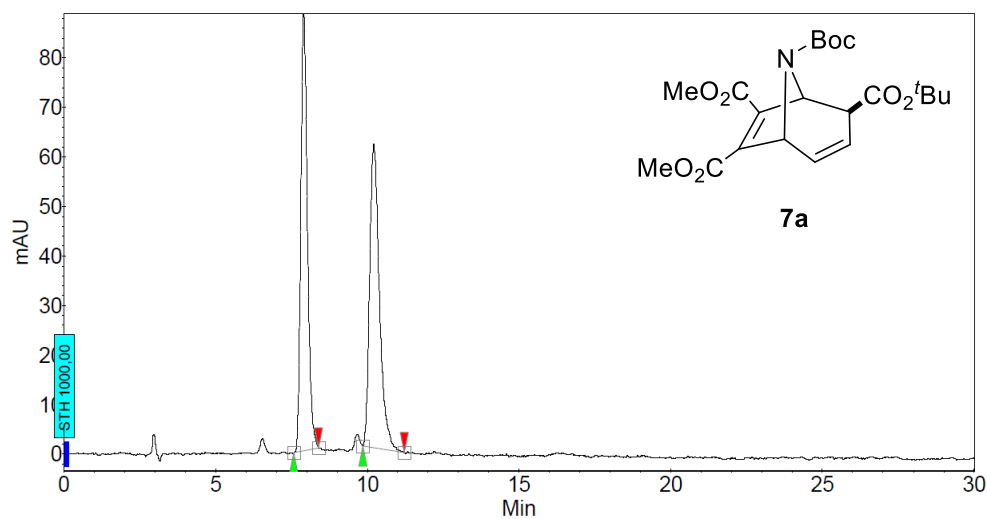

### Peak Results:

| Index        | Time (min) | Area (mAU min) | Area (%) |
|--------------|------------|----------------|----------|
| 1            | 7.90       | 22.5           | 49.565   |
| 2            | 10.21      | 22.9           | 50.435   |
| <i>Total</i> |            | 45.5           | 100.00   |

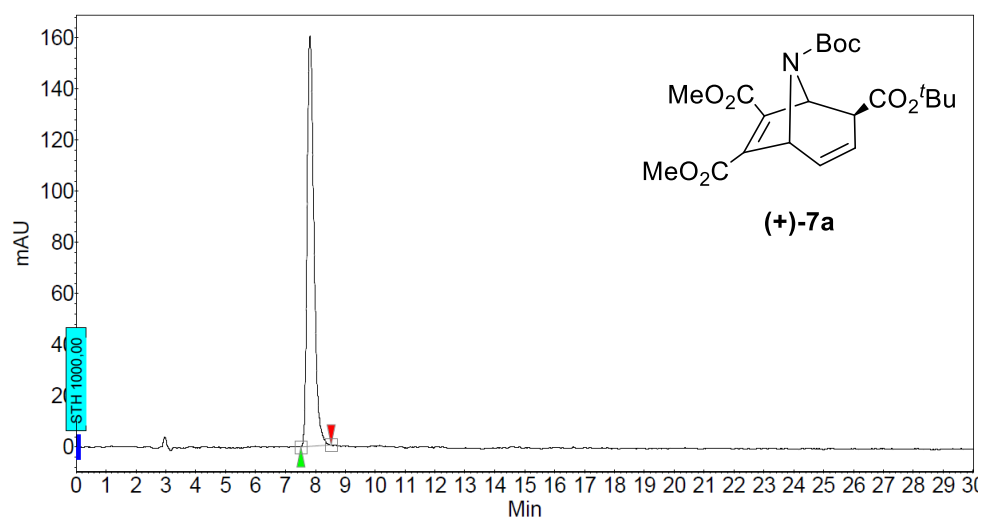

### Peak Results:

| Index | Time (min) | Area (mAU min) | Area (%) |
|-------|------------|----------------|----------|
| 1     | 7.82       | 42.2           | 100      |



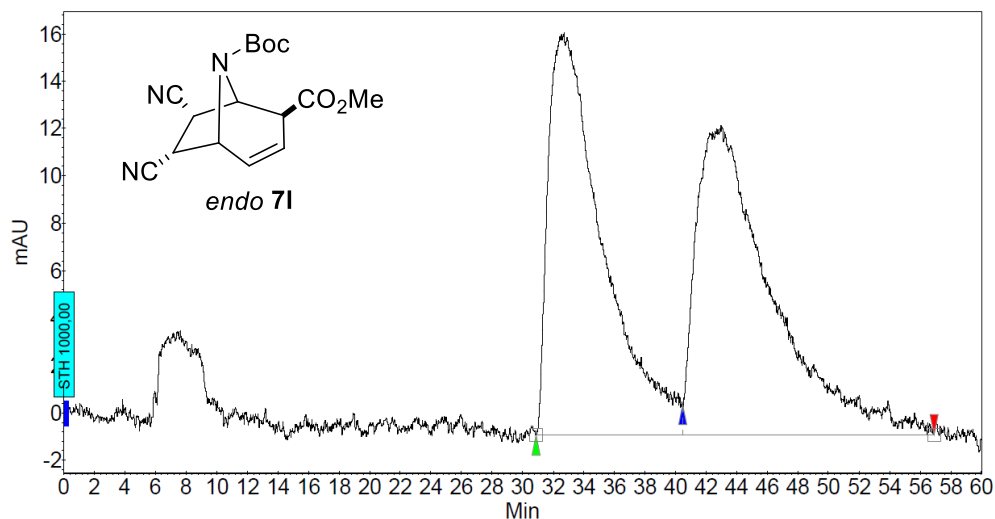

### Peak Results:

| Index        | Time (min) | Area (mAU min) | Area (%) |
|--------------|------------|----------------|----------|
| 1            | 32.72      | 69.8           | 48.302   |
| 2            | 42.98      | 74.7           | 51.698   |
| <i>Total</i> |            | 144.4          | 100.00   |

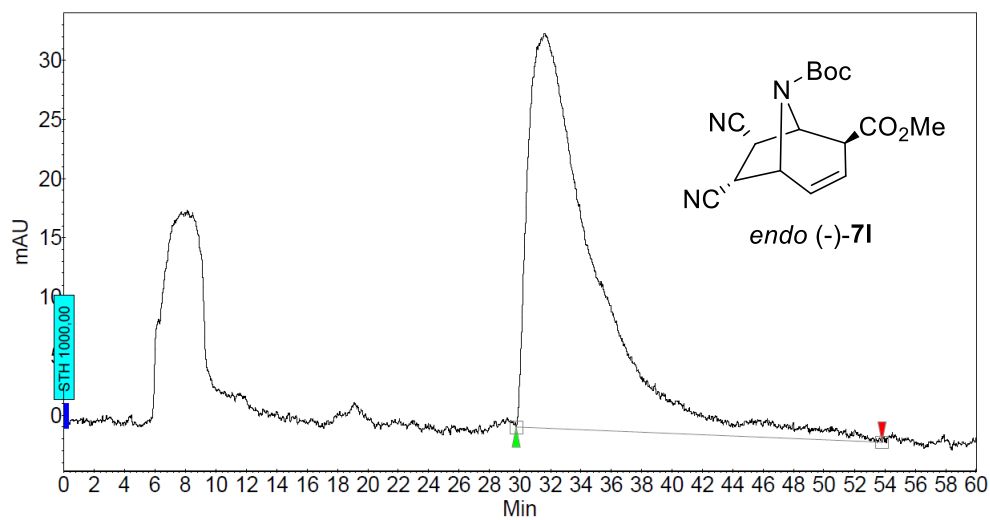

### Peak Results:

| Index | Time (min) | Area (mAU min) | Area (%) |
|-------|------------|----------------|----------|
| 1     | 31.61      | 167.2          | 100.000  |

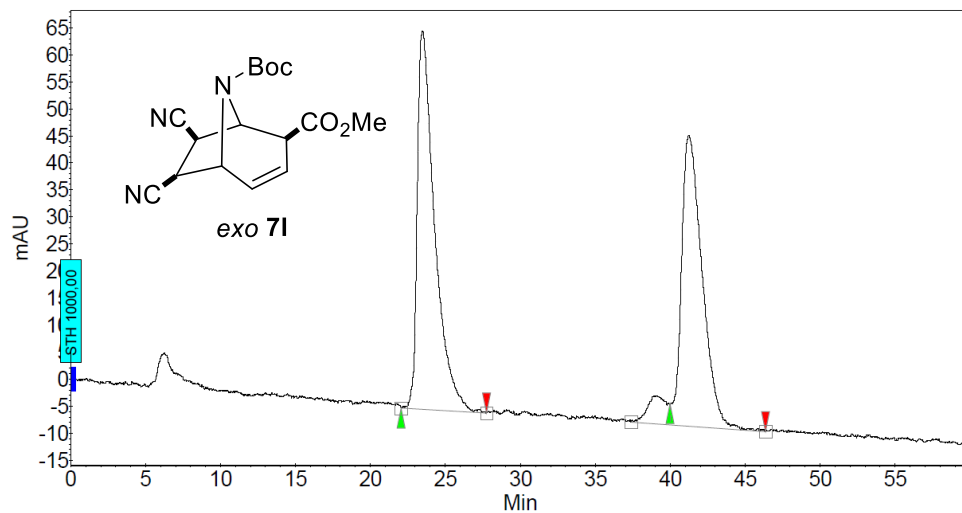

**Peak Results:**

| Index        | Time (min) | Area (mAU min) | Area (%) |
|--------------|------------|----------------|----------|
| 1            | 23.45      | 94.0           | 52.213   |
| 2            | 41.24      | 86.1           | 47.787   |
| <i>Total</i> |            | 180.1          | 100.00   |

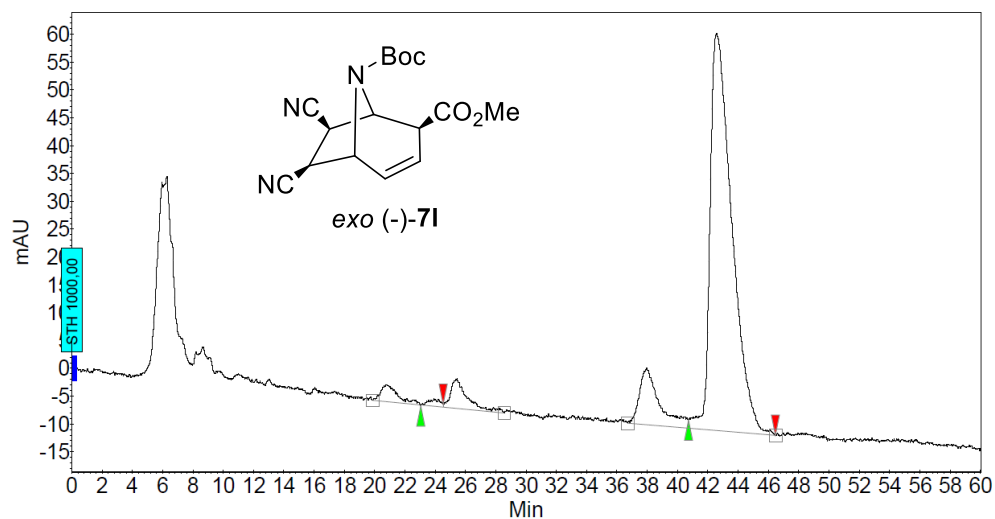

**Peak Results:**

| Index        | Time (min) | Area (mAU min) | Area (%) |
|--------------|------------|----------------|----------|
| 1            | 24.21      | 1.1            | 0.943    |
| 2            | 42.56      | 119.0          | 99.057   |
| <i>Total</i> |            | 120.1          | 100.00   |

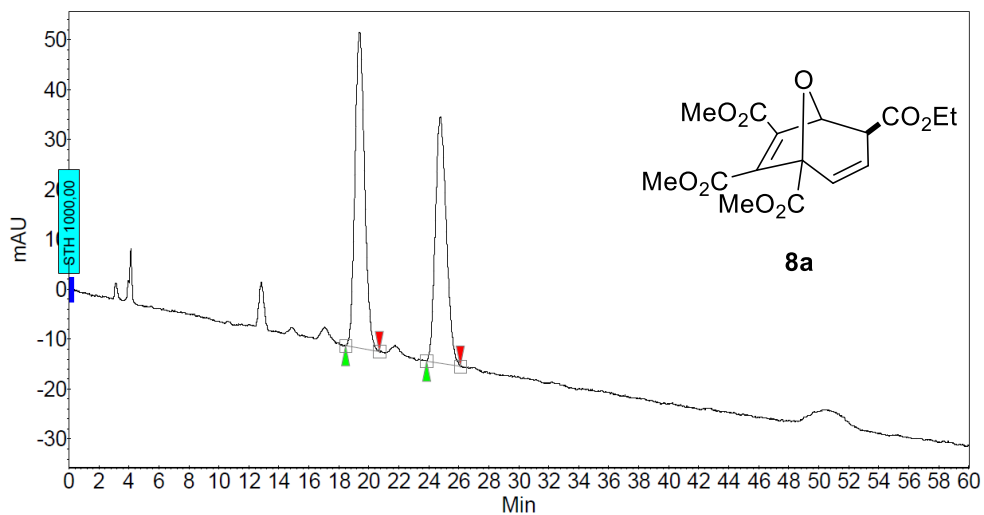

### Peak Results:

| Index        | Time (min) | Area (mAU min) | Area (%) |
|--------------|------------|----------------|----------|
| 1            | 19.38      | 47.2           | 52.911   |
| 2            | 24.77      | 42.0           | 47.089   |
| <i>Total</i> |            | 89.1           | 100.00   |

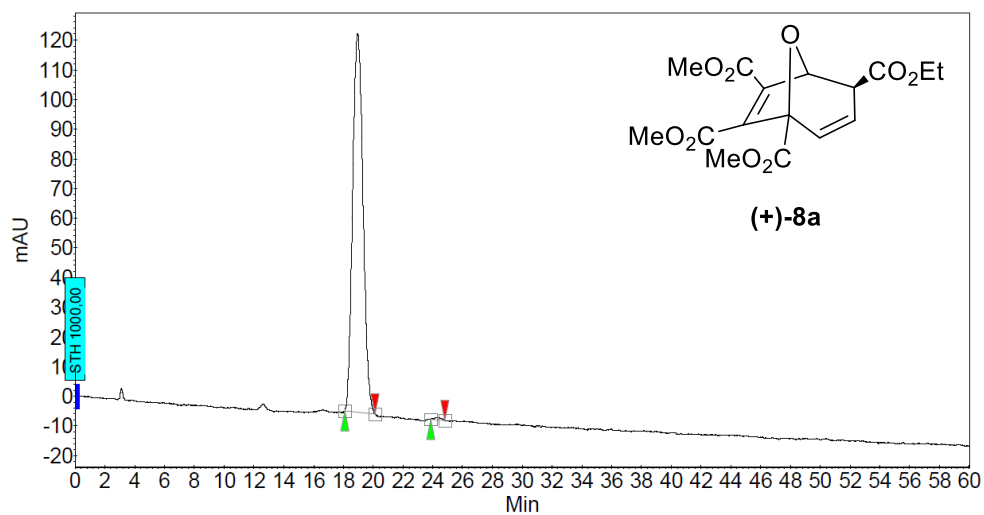

### Peak Results:

| Index        | Time (min) | Area (mAU min) | Area (%) |
|--------------|------------|----------------|----------|
| 1            | 18.96      | 103.2          | 99.544   |
| 2            | 24.37      | 0.5            | 0.456    |
| <i>Total</i> |            | 103.7          | 100.00   |

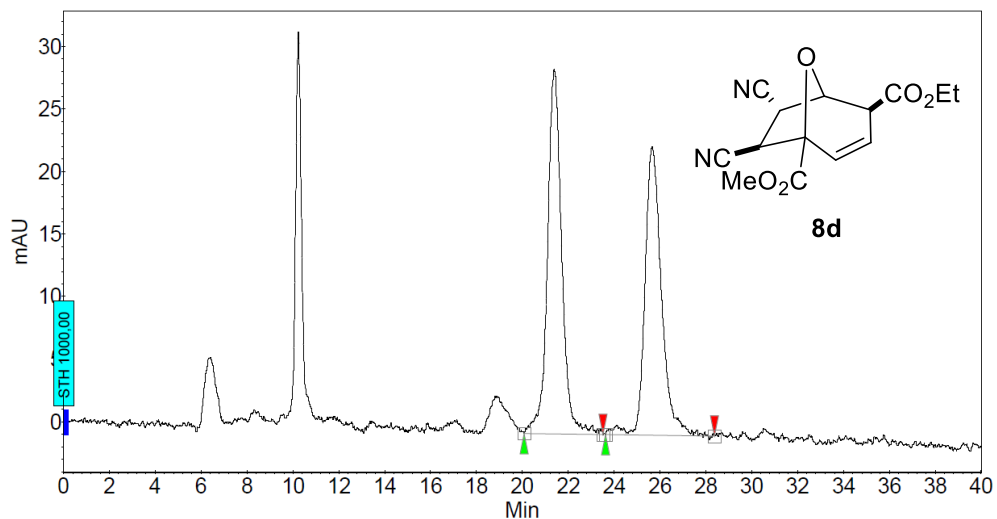

### Peak Results:

| Index        | Time (min) | Area (mAU min) | Area (%) |
|--------------|------------|----------------|----------|
| 1            | 21.39      | 21.0           | 51.997   |
| 2            | 25.66      | 19.4           | 48.003   |
| <i>Total</i> |            | 40.4           | 100.00   |

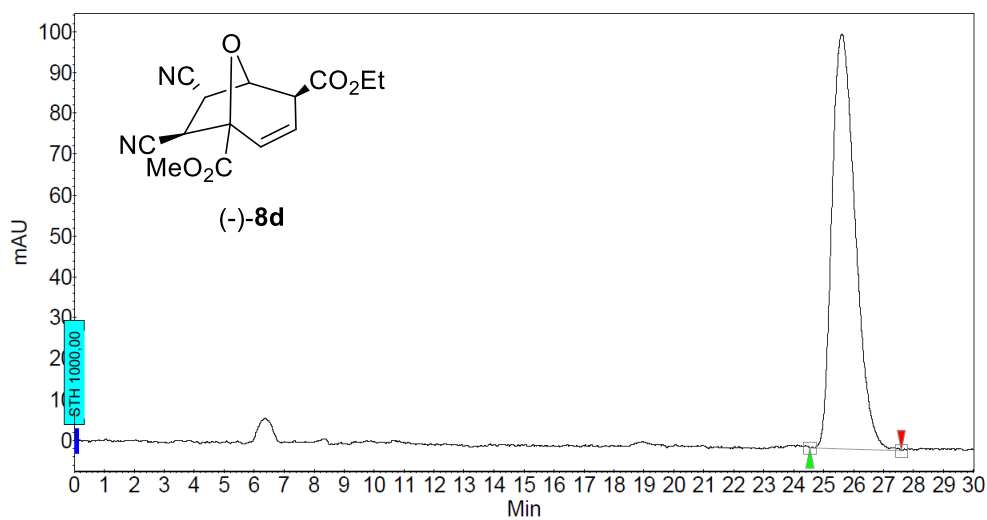

### Peak Results:

| Index | Time (min) | Area (mAU min) | Area (%) |
|-------|------------|----------------|----------|
| 1     | 25.61      | 91.4           | 100.000  |

## 6. References

- [1] R. Manfred, H. Jürgen, L. Annemarie, *Org.Synth.* **1968**, *48*, 36.
- [2] H. N. C. Wong, X. U. E. Long Hou, *Synthesis* **1985**, 1111.
- [3] D. A. Evans, K. A. Woerpel, B. Nosse, A. Schall, Y. Shinde, E. Jezek, E. Mahbubul, M. Haque, R. B. Chhor, O. Reiser, *Org.Synth.* **2006**, *83*, 97.
- [4] N. E. Searle, *Org.Synth.* **1956**, 36.
- [5] C. W. Williams, R. Shenje, S. France, *J. Org. Chem.* **2016**, *81*, 8253.
- [6] L. Grehn, U. Ragnarsson, *Angew. Chem. Int. Ed.* **1984**, *23*, 296.
- [7] L. Waykole, A. L. Paquette, *Org.Synth.* **1989**, 67.
- [8] L. K. A. Pils, T. Ertl, O. Reiser, *Org. Lett.* **2017**, *19*, 2754.
- [9] R. Beumer, University Regensburg, **2000**.
- [10] R. B. Chhor, B. Nosse, S. Sörgel, C. Böhm, M. Seitz, O. Reiser, *Chem. Eur. J.* **2003**, *9*, 260.
- [11] T. K. M. Shing, V. W.-F. Tai, E. K. W. Tam, *Angew. Chem. Int. Ed.* **1994**, *33*, 2312.
